# Supplementary material for: Common peptides shed light on evolution of Olfactory Receptors
Source: PubMed Central journal article supplement (PMC2681464; doi:10.1186/1471-2148-9-91), 2009-05-05
Supplement: 1471-2148-9-91-S3.pdf [file 1471-2148-9-91-S3.pdf]

| Name         | Number of CPs in A1 | Number of novel CPs in A2 | Number of frog novel CPs | Cluster number using CPs in A1 | Cluster number using A2 novel CPs | Cluster number using frog novel CPs | Niimura group |
|--------------|---------------------|---------------------------|--------------------------|--------------------------------|-----------------------------------|-------------------------------------|---------------|
| Xt1OR5856.2  | 22                  | 33                        | 19                       | 1                              | 1                                 | 1                                   | Y             |
| Xt1OR9730.2  | 26                  | 37                        | 15                       | 1                              | 1                                 | 1                                   | Y             |
| Xt1OR24938.1 | 15                  | 28                        | 0                        | 1                              | 1                                 | 1                                   | Y             |
| Xt1OR32249.1 | 17                  | 14                        | 6                        | 1                              | 1                                 | 1                                   | Y             |
| Xt1OR55830.1 | 23                  | 38                        | 22                       | 1                              | 1                                 | 1                                   | Y             |
| Xt1OR5856.1  | 24                  | 28                        | 27                       | 1                              | 2                                 | 1                                   | Y             |
| Xt1OR5856.6  | 15                  | 14                        | 2                        | 1                              | 2                                 | 1                                   | Y             |
| Xt1OR7451.3  | 12                  | 1                         | 5                        | 1                              | 2                                 | 1                                   | Y             |
| Xt1OR27704.1 | 21                  | 29                        | 22                       | 1                              | 2                                 | 1                                   | Y             |
| Xt1OR28450.2 | 14                  | 23                        | 15                       | 1                              | 2                                 | 1                                   | Y             |
| Xt1OR34027.1 | 11                  | 4                         | 1                        | 1                              | 2                                 | 1                                   | Y             |
| Xt1OR40709.1 | 16                  | 25                        | 19                       | 1                              | 2                                 | 1                                   | Y             |
| Xt1OR41009.2 | 18                  | 27                        | 1                        | 1                              | 2                                 | 1                                   | Y             |
| Xt1OR41117.1 | 6                   | 3                         | 13                       | 1                              | 2                                 | 1                                   | Y             |
| Xt1OR27704.1 | 13                  | 17                        | 2                        | 1                              | 2                                 | 1                                   | Y             |
| Xt1OR7451.4  | 23                  | 28                        | 20                       | 1                              | 2                                 | -                                   | Y             |
| Xt1OR7994.1  | 14                  | 23                        | 3                        | 1                              | 2                                 | -                                   | Y             |
| Xt1OR3427.7  | 18                  | 28                        | 8                        | 1                              | 3                                 | 1                                   | Y             |
| Xt1OR7451.2  | 24                  | 30                        | 26                       | 1                              | 3                                 | 1                                   | Y             |
| Xt1OR8740.2  | 13                  | 19                        | 1                        | 1                              | 3                                 | 1                                   | Y             |
| Xt1OR8740.3  | 16                  | 24                        | 2                        | 1                              | 3                                 | 1                                   | Y             |
| Xt1OR10482.4 | 21                  | 26                        | 22                       | 1                              | 3                                 | 1                                   | Y             |
| Xt1OR14126.2 | 22                  | 27                        | 28                       | 1                              | 3                                 | 1                                   | Y             |
| Xt1OR3078.2  | 18                  | 18                        | 6                        | 1                              | 3                                 | 1                                   | Y             |
| Xt1OR3078.3  | 18                  | 20                        | 2                        | 1                              | 3                                 | 1                                   | Y             |
| Xt1OR7422.2  | 27                  | 41                        | 16                       | 1                              | 3                                 | -                                   | Y             |
| Xt1OR3735.1  | 24                  | 32                        | 26                       | 1                              | 5                                 | 1                                   | Y             |
| Xt1OR5358.1  | 15                  | 0                         | 2                        | 1                              | 5                                 | 1                                   | Y             |
| Xt1OR5358.2  | 19                  | 13                        | 2                        | 1                              | 5                                 | 1                                   | Y             |
| Xt1OR5358.3  | 13                  | 9                         | 5                        | 1                              | 5                                 | 1                                   | Y             |
| Xt1OR7422.1  | 14                  | 30                        | 22                       | 1                              | 5                                 | 1                                   | Y             |
| Xt1OR8740.1  | 18                  | 3                         | 3                        | 1                              | 5                                 | 1                                   | Y             |
| Xt1OR9730.3  | 27                  | 39                        | 15                       | 1                              | 5                                 | 1                                   | Y             |
| Xt1OR9939.2  | 24                  | 31                        | 15                       | 1                              | 5                                 | 1                                   | Y             |
| Xt1OR9939.4  | 22                  | 24                        | 10                       | 1                              | 5                                 | 1                                   | Y             |
| Xt1OR10482.3 | 10                  | 13                        | 1                        | 1                              | 5                                 | 1                                   | Y             |
| Xt1OR14126.3 | 22                  | 27                        | 20                       | 1                              | 5                                 | 1                                   | Y             |
| Xt1OR17382.1 | 21                  | 32                        | 17                       | 1                              | 5                                 | 1                                   | Y             |
| Xt1OR17382.2 | 21                  | 26                        | 16                       | 1                              | 5                                 | 1                                   | Y             |
| Xt1OR20244.2 | 19                  | 25                        | 18                       | 1                              | 5                                 | 1                                   | Y             |
| Xt1OR20433.1 | 23                  | 20                        | 20                       | 1                              | 5                                 | 1                                   | Y             |
| Xt1OR22245.1 | 14                  | 16                        | 3                        | 1                              | 5                                 | 1                                   | Y             |
| Xt1OR23570.2 | 13                  | 0                         | 2                        | 1                              | 5                                 | 1                                   | Y             |
| Xt1OR41009.1 | 24                  | 22                        | 2                        | 1                              | 5                                 | 1                                   | Y             |
| Xt1OR51027.1 | 19                  | 11                        | 2                        | 1                              | 5                                 | 1                                   | Y             |
| Xt1OR52090.1 | 21                  | 23                        | 21                       | 1                              | 5                                 | 1                                   | Y             |
| Xt1OR56183.1 | 24                  | 28                        | 11                       | 1                              | 5                                 | 1                                   | Y             |
| Xt1OR56994.1 | 21                  | 17                        | 4                        | 1                              | 5                                 | 1                                   | Y             |
| Xt1OR64627.1 | 12                  | 9                         | 1                        | 1                              | 5                                 | 1                                   | Y             |
| Xt1OR65408.1 | 10                  | 11                        | 5                        | 1                              | 5                                 | 1                                   | Y             |
| Xt1OR23570.2 | 20                  | 13                        | 6                        | 1                              | 5                                 | 1                                   | Y             |

|              |    |    |    |   |   |   |   |
|--------------|----|----|----|---|---|---|---|
| Xt1OR25044.1 | 22 | 29 | 26 | 1 | 5 | - | Y |
| Xt1OR9555.2  | 14 | 16 | 1  | 2 | 1 | 8 | Y |
| Xt1OR9837.2  | 13 | 17 | 0  | 2 | 2 | 8 | Y |
| Xt1OR35491.1 | 18 | 20 | 5  | 2 | 2 | 8 | Y |
| Xt1OR58724.1 | 18 | 7  | 0  | 2 | 2 | 8 | Y |
| Xt1OR68906.1 | 20 | 24 | 9  | 2 | 2 | 8 | Y |
| Xt1OR9357.1  | 21 | 14 | 3  | 2 | 3 | 8 | Y |
| Xt1OR9837.4  | 1  | 0  | 0  | 2 | 3 | 8 | Y |
| Xt1OR20513.1 | 16 | 11 | 6  | 2 | 3 | 8 | Y |
| Xt1OR22013.2 | 16 | 22 | 0  | 2 | 3 | 8 | Y |
| Xt1OR22444.1 | 15 | 18 | 1  | 2 | 3 | 8 | Y |
| Xt1OR25245.1 | 20 | 17 | 7  | 2 | 3 | 8 | Y |
| Xt1OR26834.1 | 11 | 2  | 3  | 2 | 3 | 8 | Y |
| Xt1OR28273.2 | 8  | 16 | 0  | 2 | 3 | 8 | Y |
| Xt1OR36461.1 | 21 | 30 | 21 | 2 | 3 | 8 | Y |
| Xt1OR36933.1 | 22 | 26 | 1  | 2 | 3 | 8 | Y |
| Xt1OR37278.1 | 20 | 10 | 4  | 2 | 3 | 8 | Y |
| Xt1OR41904.2 | 22 | 23 | 9  | 2 | 3 | 8 | Y |
| Xt1OR42735.1 | 9  | 24 | 8  | 2 | 3 | 8 | Y |
| Xt1OR17942.2 | 22 | 25 | 26 | 2 | 4 | 8 | Y |
| Xt1OR17942.3 | 16 | 19 | 7  | 2 | 4 | 8 | Y |
| Xt1OR3458.1  | 17 | 20 | 24 | 2 | 5 | 8 | Y |
| Xt1OR6630.1  | 14 | 30 | 23 | 2 | 5 | 8 | Y |
| Xt1OR8023.4  | 15 | 25 | 7  | 2 | 5 | 8 | Y |
| Xt1OR8319.1  | 24 | 13 | 3  | 2 | 5 | 8 | Y |
| Xt1OR8319.2  | 22 | 6  | 2  | 2 | 5 | 8 | Y |
| Xt1OR11670.1 | 20 | 31 | 24 | 2 | 5 | 8 | Y |
| Xt1OR11742.1 | 21 | 32 | 21 | 2 | 5 | 8 | Y |
| Xt1OR11956.1 | 22 | 34 | 19 | 2 | 5 | 8 | Y |
| Xt1OR11956.2 | 23 | 35 | 23 | 2 | 5 | 8 | Y |
| Xt1OR12109.3 | 17 | 17 | 0  | 2 | 5 | 8 | Y |
| Xt1OR12109.4 | 10 | 11 | 5  | 2 | 5 | 8 | Y |
| Xt1OR14171.2 | 30 | 37 | 16 | 2 | 5 | 8 | Y |
| Xt1OR14754.1 | 9  | 16 | 1  | 2 | 5 | 8 | Y |
| Xt1OR14754.2 | 19 | 14 | 2  | 2 | 5 | 8 | Y |
| Xt1OR14896.3 | 19 | 26 | 1  | 2 | 5 | 8 | Y |
| Xt1OR16080.1 | 6  | 4  | 16 | 2 | 5 | 8 | Y |
| Xt1OR16801.2 | 22 | 30 | 25 | 2 | 5 | 8 | Y |
| Xt1OR17942.1 | 15 | 26 | 3  | 2 | 5 | 8 | Y |
| Xt1OR19253.1 | 25 | 30 | 21 | 2 | 5 | 8 | Y |
| Xt1OR19799.2 | 12 | 13 | 3  | 2 | 5 | 8 | Y |
| Xt1OR22940.1 | 18 | 17 | 19 | 2 | 5 | 8 | Y |
| Xt1OR28345.3 | 17 | 11 | 1  | 2 | 5 | 8 | Y |
| Xt1OR29560.1 | 12 | 0  | 2  | 2 | 5 | 8 | Y |
| Xt1OR29875.1 | 15 | 28 | 1  | 2 | 5 | 8 | Y |
| Xt1OR29919.1 | 15 | 18 | 3  | 2 | 5 | 8 | Y |
| Xt1OR35885.2 | 11 | 11 | 0  | 2 | 5 | 8 | Y |
| Xt1OR36854.1 | 11 | 21 | 1  | 2 | 5 | 8 | Y |
| Xt1OR37065.2 | 21 | 23 | 26 | 2 | 5 | 8 | Y |
| Xt1OR53932.1 | 22 | 29 | 23 | 2 | 5 | 8 | Y |
| Xt1OR57187.1 | 22 | 29 | 29 | 2 | 5 | 8 | Y |
| Xt1OR3389.1  | 20 | 26 | 22 | 3 | 1 | 3 | Y |
| Xt1OR9064.2  | 20 | 25 | 10 | 3 | 1 | 3 | Y |
| Xt1OR22749.1 | 24 | 13 | 4  | 3 | 1 | 3 | Y |
| Xt1OR18276.2 | 12 | 23 | 1  | 3 | 1 | 9 | Y |

|              |    |    |    |   |   |   |   |
|--------------|----|----|----|---|---|---|---|
| Xt1OR22277.1 | 19 | 17 | 6  | 3 | 1 | 9 | Y |
| Xt1OR25568.1 | 17 | 34 | 18 | 3 | 1 | 9 | Y |
| Xt1OR18276.2 | 16 | 27 | 2  | 3 | 1 | 9 | Y |
| Xt1OR22277.1 | 27 | 40 | 16 | 3 | 1 | 9 | Y |
| Xt1OR3374.1  | 21 | 29 | 22 | 3 | 2 | 3 | Y |
| Xt1OR3374.2  | 16 | 14 | 4  | 3 | 2 | 3 | Y |
| Xt1OR3374.4  | 21 | 29 | 22 | 3 | 2 | 3 | Y |
| Xt1OR21725.1 | 18 | 18 | 12 | 3 | 2 | 3 | Y |
| Xt1OR27101.1 | 24 | 33 | 19 | 3 | 2 | 3 | Y |
| Xt1OR27101.2 | 18 | 17 | 10 | 3 | 2 | 3 | Y |
| Xt1OR6349.1  | 15 | 27 | 19 | 3 | 2 | 9 | Y |
| Xt1OR9439.1  | 17 | 13 | 3  | 3 | 2 | 9 | Y |
| Xt1OR11826.2 | 18 | 16 | 2  | 3 | 2 | 9 | Y |
| Xt1OR12839.1 | 11 | 0  | 3  | 3 | 2 | 9 | Y |
| Xt1OR13656.1 | 27 | 30 | 16 | 3 | 2 | 9 | Y |
| Xt1OR17800.1 | 16 | 23 | 4  | 3 | 2 | 9 | Y |
| Xt1OR27472.2 | 22 | 20 | 27 | 3 | 2 | 9 | Y |
| Xt1OR17800.1 | 17 | 21 | 6  | 3 | 2 | 9 | Y |
| Xt1OR30229.2 | 12 | 34 | 2  | 3 | 3 | 3 | Y |
| Xt1OR43871.1 | 19 | 20 | 1  | 3 | 3 | 3 | Y |
| Xt1OR62303.1 | 13 | 10 | 0  | 3 | 3 | 3 | Y |
| Xt1OR14807.2 | 15 | 22 | 5  | 3 | 3 | 9 | Y |
| Xt1OR17800.3 | 13 | 25 | 1  | 3 | 3 | 9 | Y |
| Xt1OR12245.1 | 14 | 22 | 7  | 3 | 5 | 3 | Y |
| Xt1OR15876.1 | 7  | 3  | 17 | 3 | 5 | 3 | Y |
| Xt1OR16668.1 | 22 | 25 | 23 | 3 | 5 | 3 | Y |
| Xt1OR23535.1 | 22 | 29 | 28 | 3 | 5 | 3 | Y |
| Xt1OR23535.2 | 21 | 30 | 27 | 3 | 5 | 3 | Y |
| Xt1OR39273.1 | 21 | 27 | 25 | 3 | 5 | 3 | Y |
| Xt1OR3428.3  | 16 | 19 | 0  | 3 | 5 | 9 | Y |
| Xt1OR9954.1  | 13 | 15 | 1  | 3 | 5 | 9 | Y |
| Xt1OR14807.3 | 23 | 37 | 20 | 3 | 5 | 9 | Y |
| Xt1OR15603.1 | 18 | 11 | 2  | 3 | 5 | 9 | Y |
| Xt1OR15603.2 | 11 | 26 | 4  | 3 | 5 | 9 | Y |
| Xt1OR15603.3 | 10 | 1  | 5  | 3 | 5 | 9 | Y |
| Xt1OR22277.2 | 17 | 28 | 16 | 3 | 5 | 9 | Y |
| Xt1OR22490.2 | 24 | 30 | 22 | 3 | 5 | 9 | Y |
| Xt1OR29421.1 | 15 | 27 | 23 | 3 | 5 | 9 | Y |
| Xt1OR29947.1 | 7  | 4  | 15 | 3 | 5 | 9 | Y |
| Xt1OR30196.1 | 17 | 20 | 0  | 3 | 5 | 9 | Y |
| Xt1OR31127.1 | 23 | 27 | 25 | 3 | 5 | 9 | Y |
| Xt1OR34945.1 | 16 | 27 | 21 | 3 | 5 | 9 | Y |
| Xt1OR35901.1 | 14 | 3  | 2  | 3 | 5 | 9 | Y |
| Xt1OR39494.1 | 21 | 25 | 24 | 3 | 5 | 9 | Y |
| Xt1OR49233.1 | 23 | 30 | 24 | 3 | 5 | 9 | Y |
| Xt1OR52587.1 | 15 | 23 | 4  | 3 | 5 | 9 | Y |
| Xt1OR15603.2 | 16 | 17 | 8  | 3 | 5 | 9 | Y |
| Xt1OR15603.3 | 21 | 32 | 13 | 3 | 5 | 9 | Y |
| Xt1OR3428.3  | 22 | 25 | 22 | 3 | 5 | 9 | Y |
| Xt1OR16390.1 | 22 | 20 | 29 | 3 | 5 | - | Y |
| Xt1OR34566.1 | 18 | 15 | 4  | 3 | 5 | - | Y |
| Xt1OR3116.2  | 18 | 20 | 7  | 4 | 1 | 3 | Y |
| Xt1OR3116.3  | 11 | 20 | 2  | 4 | 1 | 3 | Y |
| Xt1OR9937.1  | 28 | 33 | 18 | 4 | 1 | 3 | Y |
| Xt1OR26158.1 | 21 | 19 | 7  | 4 | 1 | 3 | Y |

|              |    |    |    |   |   |   |   |
|--------------|----|----|----|---|---|---|---|
| Xt1OR17535.3 | 16 | 27 | 22 | 4 | 1 | 6 | Y |
| Xt1OR22035.1 | 14 | 27 | 18 | 4 | 1 | 7 | Y |
| Xt1OR42847.2 | 19 | 16 | 2  | 4 | 1 | 7 | Y |
| Xt1OR5339.2  | 14 | 13 | 2  | 4 | 1 | - | Y |
| Xt1OR9220.2  | 20 | 12 | 3  | 4 | 1 | - | Y |
| Xt1OR14061.1 | 25 | 31 | 15 | 4 | 1 | - | Y |
| Xt1OR20565.1 | 24 | 30 | 23 | 4 | 1 | - | Y |
| Xt1OR22554.1 | 13 | 13 | 3  | 4 | 1 | - | Y |
| Xt1OR25964.1 | 16 | 29 | 7  | 4 | 1 | - | Y |
| Xt1OR29482.2 | 15 | 13 | 4  | 4 | 1 | - | Y |
| Xt1OR45359.1 | 24 | 27 | 24 | 4 | 1 | - | Y |
| Xt1OR25964.1 | 14 | 3  | 4  | 4 | 1 | - | Y |
| Xt1OR4811.2  | 17 | 32 | 0  | 4 | 2 | 3 | Y |
| Xt1OR19403.1 | 14 | 2  | 4  | 4 | 2 | 3 | Y |
| Xt1OR31520.1 | 13 | 28 | 2  | 4 | 2 | 3 | Y |
| Xt1OR62426.1 | 18 | 18 | 6  | 4 | 2 | 3 | Y |
| Xt1OR21356.1 | 21 | 20 | 25 | 4 | 2 | 4 | Y |
| Xt1OR33320.1 | 19 | 19 | 1  | 4 | 2 | 4 | Y |
| Xt1OR18658.3 | 16 | 19 | 2  | 4 | 2 | 8 | Y |
| Xt1OR55629.1 | 20 | 38 | 19 | 4 | 2 | 8 | Y |
| Xt1OR51098.1 | 15 | 0  | 2  | 4 | 2 | 9 | Y |
| Xt1OR3833.2  | 15 | 12 | 4  | 4 | 2 | - | Y |
| Xt1OR5498.1  | 18 | 18 | 3  | 4 | 2 | - | Y |
| Xt1OR9560.4  | 26 | 34 | 15 | 4 | 2 | - | Y |
| Xt1OR10601.3 | 21 | 32 | 7  | 4 | 2 | - | Y |
| Xt1OR13207.1 | 18 | 24 | 22 | 4 | 2 | - | Y |
| Xt1OR15862.1 | 8  | 5  | 9  | 4 | 2 | - | Y |
| Xt1OR19366.1 | 25 | 35 | 15 | 4 | 2 | - | Y |
| Xt1OR21066.1 | 15 | 8  | 4  | 4 | 2 | - | Y |
| Xt1OR25044.3 | 16 | 10 | 0  | 4 | 2 | - | Y |
| Xt1OR26074.1 | 18 | 24 | 9  | 4 | 2 | - | Y |
| Xt1OR26074.2 | 19 | 21 | 0  | 4 | 2 | - | Y |
| Xt1OR26878.2 | 24 | 31 | 26 | 4 | 2 | - | Y |
| Xt1OR27812.1 | 24 | 25 | 22 | 4 | 2 | - | Y |
| Xt1OR45488.1 | 20 | 20 | 27 | 4 | 2 | - | Y |
| Xt1OR50407.1 | 20 | 17 | 1  | 4 | 2 | - | Y |
| Xt1OR29757.2 | 6  | 3  | 16 | 4 | 3 | 7 | Y |
| Xt1OR16474.1 | 24 | 29 | 20 | 4 | 3 | 8 | Y |
| Xt1OR18612.1 | 17 | 14 | 5  | 4 | 3 | 8 | Y |
| Xt1OR9064.1  | 18 | 26 | 6  | 4 | 3 | 9 | Y |
| Xt1OR47891.1 | 23 | 31 | 23 | 4 | 3 | 9 | Y |
| Xt1OR5151.1  | 18 | 25 | 3  | 4 | 3 | - | Y |
| Xt1OR5339.4  | 13 | 3  | 0  | 4 | 3 | - | Y |
| Xt1OR11138.2 | 17 | 23 | 6  | 4 | 3 | - | Y |
| Xt1OR12702.2 | 11 | 3  | 1  | 4 | 3 | - | Y |
| Xt1OR17771.1 | 15 | 24 | 4  | 4 | 3 | - | Y |
| Xt1OR19783.1 | 24 | 31 | 27 | 4 | 3 | - | Y |
| Xt1OR23566.1 | 23 | 26 | 25 | 4 | 3 | - | Y |
| Xt1OR25146.1 | 18 | 17 | 0  | 4 | 3 | - | Y |
| Xt1OR30036.2 | 7  | 4  | 14 | 4 | 3 | - | Y |
| Xt1OR30827.1 | 13 | 15 | 3  | 4 | 3 | - | Y |
| Xt1OR33380.1 | 18 | 21 | 7  | 4 | 3 | - | Y |
| Xt1OR37563.1 | 18 | 29 | 9  | 4 | 3 | - | Y |
| Xt1OR45335.1 | 17 | 3  | 3  | 4 | 3 | - | Y |
| Xt1OR49135.1 | 13 | 22 | 8  | 4 | 3 | - | Y |

|              |    |    |    |   |   |   |   |
|--------------|----|----|----|---|---|---|---|
| Xt1OR49836.1 | 3  | 0  | 0  | 4 | 3 | - | Y |
| Xt1OR50263.1 | 22 | 27 | 28 | 4 | 3 | - | Y |
| Xt1OR61281.1 | 19 | 27 | 26 | 4 | 3 | - | Y |
| Xt1OR45335.1 | 18 | 24 | 7  | 4 | 3 | - | Y |
| Xt1OR61281.1 | 20 | 11 | 0  | 4 | 3 | - | Y |
| Xt1OR47529.2 | 15 | 15 | 6  | 4 | 4 | 8 | Y |
| Xt1OR3795.1  | 16 | 27 | 14 | 4 | 4 | - | Y |
| Xt1OR3833.1  | 15 | 11 | 5  | 4 | 4 | - | Y |
| Xt1OR5104.2  | 15 | 23 | 3  | 4 | 4 | - | Y |
| Xt1OR33122.1 | 10 | 11 | 3  | 4 | 4 | - | Y |
| Xt1OR41875.2 | 20 | 19 | 6  | 4 | 4 | - | Y |
| Xt1OR47982.1 | 16 | 28 | 5  | 4 | 4 | - | Y |
| Xt1OR41875.2 | 16 | 11 | 3  | 4 | 4 | - | Y |
| Xt1OR47982.1 | 16 | 18 | 1  | 4 | 4 | - | Y |
| Xt1OR3795.2  | 15 | 10 | 5  | 4 | 5 | 2 | Y |
| Xt1OR13035.1 | 13 | 22 | 1  | 4 | 5 | 2 | Y |
| Xt1OR25788.1 | 22 | 33 | 21 | 4 | 5 | 2 | Y |
| Xt1OR4811.3  | 20 | 23 | 17 | 4 | 5 | 3 | Y |
| Xt1OR4811.4  | 23 | 29 | 26 | 4 | 5 | 3 | Y |
| Xt1OR15006.1 | 11 | 19 | 0  | 4 | 5 | 3 | Y |
| Xt1OR15478.1 | 17 | 10 | 3  | 4 | 5 | 3 | Y |
| Xt1OR21320.1 | 16 | 12 | 6  | 4 | 5 | 3 | Y |
| Xt1OR22135.1 | 25 | 28 | 27 | 4 | 5 | 3 | Y |
| Xt1OR22644.2 | 21 | 33 | 11 | 4 | 5 | 3 | Y |
| Xt1OR25295.1 | 23 | 37 | 20 | 4 | 5 | 3 | Y |
| Xt1OR31304.1 | 19 | 27 | 9  | 4 | 5 | 3 | Y |
| Xt1OR34718.1 | 17 | 19 | 3  | 4 | 5 | 3 | Y |
| Xt1OR36836.1 | 27 | 31 | 17 | 4 | 5 | 3 | Y |
| Xt1OR43677.1 | 11 | 4  | 4  | 4 | 5 | 3 | Y |
| Xt1OR44345.1 | 19 | 30 | 20 | 4 | 5 | 3 | Y |
| Xt1OR20595.1 | 16 | 20 | 5  | 4 | 5 | 4 | Y |
| Xt1OR20595.2 | 16 | 9  | 4  | 4 | 5 | 4 | Y |
| Xt1OR42256.1 | 15 | 20 | 5  | 4 | 5 | 4 | Y |
| Xt1OR29545.1 | 21 | 35 | 13 | 4 | 5 | 6 | Y |
| Xt1OR12007.1 | 28 | 33 | 20 | 4 | 5 | 7 | Y |
| Xt1OR13598.1 | 10 | 11 | 0  | 4 | 5 | 7 | Y |
| Xt1OR32100.1 | 23 | 21 | 25 | 4 | 5 | 7 | Y |
| Xt1OR36311.2 | 24 | 25 | 15 | 4 | 5 | 7 | Y |
| Xt1OR41326.1 | 22 | 21 | 25 | 4 | 5 | 7 | Y |
| Xt1OR50884.2 | 13 | 16 | 2  | 4 | 5 | 7 | Y |
| Xt1OR60647.1 | 19 | 16 | 6  | 4 | 5 | 7 | Y |
| Xt1OR14618.1 | 15 | 19 | 1  | 4 | 5 | 8 | Y |
| Xt1OR14841.1 | 25 | 35 | 20 | 4 | 5 | 8 | Y |
| Xt1OR20177.1 | 23 | 28 | 21 | 4 | 5 | 8 | Y |
| Xt1OR22779.1 | 18 | 26 | 17 | 4 | 5 | 8 | Y |
| Xt1OR33154.1 | 13 | 10 | 1  | 4 | 5 | 8 | Y |
| Xt1OR42619.1 | 15 | 15 | 2  | 4 | 5 | 8 | Y |
| Xt1OR10411.1 | 12 | 15 | 1  | 4 | 5 | 9 | Y |
| Xt1OR43378.1 | 24 | 33 | 23 | 4 | 5 | 9 | Y |
| Xt1OR3755.1  | 24 | 38 | 17 | 4 | 5 | - | Y |
| Xt1OR4379.1  | 16 | 20 | 22 | 4 | 5 | - | Y |
| Xt1OR4379.2  | 20 | 28 | 23 | 4 | 5 | - | Y |
| Xt1OR4571.2  | 13 | 21 | 4  | 4 | 5 | - | Y |
| Xt1OR5339.1  | 14 | 21 | 18 | 4 | 5 | - | Y |
| Xt1OR5339.3  | 21 | 29 | 3  | 4 | 5 | - | Y |

|              |    |    |    |   |   |   |   |
|--------------|----|----|----|---|---|---|---|
| Xt1OR5992.1  | 19 | 23 | 6  | 4 | 5 | - | Y |
| Xt1OR6270.1  | 14 | 16 | 0  | 4 | 5 | - | Y |
| Xt1OR6343.1  | 18 | 14 | 7  | 4 | 5 | - | Y |
| Xt1OR6343.3  | 16 | 11 | 6  | 4 | 5 | - | Y |
| Xt1OR6697.1  | 13 | 26 | 21 | 4 | 5 | - | Y |
| Xt1OR7451.1  | 26 | 22 | 9  | 4 | 5 | - | Y |
| Xt1OR7764.1  | 12 | 14 | 1  | 4 | 5 | - | Y |
| Xt1OR8327.2  | 17 | 3  | 4  | 4 | 5 | - | Y |
| Xt1OR9040.2  | 16 | 24 | 0  | 4 | 5 | - | Y |
| Xt1OR10073.2 | 8  | 4  | 2  | 4 | 5 | - | Y |
| Xt1OR10073.3 | 12 | 0  | 2  | 4 | 5 | - | Y |
| Xt1OR10336.2 | 15 | 21 | 2  | 4 | 5 | - | Y |
| Xt1OR10528.1 | 21 | 33 | 23 | 4 | 5 | - | Y |
| Xt1OR10601.1 | 11 | 13 | 1  | 4 | 5 | - | Y |
| Xt1OR10609.1 | 18 | 23 | 4  | 4 | 5 | - | Y |
| Xt1OR11058.2 | 14 | 16 | 3  | 4 | 5 | - | Y |
| Xt1OR11058.4 | 18 | 23 | 5  | 4 | 5 | - | Y |
| Xt1OR12356.2 | 11 | 0  | 1  | 4 | 5 | - | Y |
| Xt1OR12702.1 | 9  | 1  | 1  | 4 | 5 | - | Y |
| Xt1OR12702.3 | 12 | 1  | 1  | 4 | 5 | - | Y |
| Xt1OR13035.2 | 18 | 30 | 23 | 4 | 5 | - | Y |
| Xt1OR13241.1 | 20 | 30 | 19 | 4 | 5 | - | Y |
| Xt1OR14239.2 | 27 | 28 | 15 | 4 | 5 | - | Y |
| Xt1OR14549.2 | 20 | 23 | 28 | 4 | 5 | - | Y |
| Xt1OR15020.1 | 13 | 9  | 2  | 4 | 5 | - | Y |
| Xt1OR15020.2 | 18 | 20 | 2  | 4 | 5 | - | Y |
| Xt1OR16736.1 | 21 | 28 | 27 | 4 | 5 | - | Y |
| Xt1OR17001.1 | 16 | 18 | 7  | 4 | 5 | - | Y |
| Xt1OR18602.2 | 17 | 25 | 1  | 4 | 5 | - | Y |
| Xt1OR18653.1 | 22 | 25 | 23 | 4 | 5 | - | Y |
| Xt1OR19892.1 | 14 | 21 | 1  | 4 | 5 | - | Y |
| Xt1OR19892.2 | 19 | 13 | 6  | 4 | 5 | - | Y |
| Xt1OR20350.1 | 18 | 17 | 15 | 4 | 5 | - | Y |
| Xt1OR22739.1 | 25 | 34 | 18 | 4 | 5 | - | Y |
| Xt1OR22739.2 | 17 | 28 | 9  | 4 | 5 | - | Y |
| Xt1OR24353.1 | 20 | 18 | 6  | 4 | 5 | - | Y |
| Xt1OR24374.1 | 15 | 26 | 2  | 4 | 5 | - | Y |
| Xt1OR24468.1 | 20 | 22 | 1  | 4 | 5 | - | Y |
| Xt1OR24775.2 | 22 | 21 | 11 | 4 | 5 | - | Y |
| Xt1OR25354.1 | 12 | 6  | 1  | 4 | 5 | - | Y |
| Xt1OR25888.1 | 12 | 10 | 1  | 4 | 5 | - | Y |
| Xt1OR26205.2 | 16 | 29 | 7  | 4 | 5 | - | Y |
| Xt1OR26941.1 | 15 | 19 | 6  | 4 | 5 | - | Y |
| Xt1OR26941.2 | 17 | 24 | 10 | 4 | 5 | - | Y |
| Xt1OR27832.2 | 16 | 13 | 0  | 4 | 5 | - | Y |
| Xt1OR28491.2 | 17 | 11 | 5  | 4 | 5 | - | Y |
| Xt1OR28977.2 | 23 | 30 | 22 | 4 | 5 | - | Y |
| Xt1OR29026.1 | 15 | 27 | 23 | 4 | 5 | - | Y |
| Xt1OR30827.2 | 13 | 15 | 3  | 4 | 5 | - | Y |
| Xt1OR32907.1 | 14 | 9  | 0  | 4 | 5 | - | Y |
| Xt1OR34203.1 | 20 | 29 | 23 | 4 | 5 | - | Y |
| Xt1OR34772.1 | 10 | 21 | 21 | 4 | 5 | - | Y |
| Xt1OR37736.1 | 24 | 30 | 26 | 4 | 5 | - | Y |
| Xt1OR37794.2 | 14 | 15 | 5  | 4 | 5 | - | Y |
| Xt1OR39782.1 | 19 | 12 | 1  | 4 | 5 | - | Y |

|              |    |    |    |   |   |   |   |
|--------------|----|----|----|---|---|---|---|
| Xt1OR42561.1 | 25 | 35 | 18 | 4 | 5 | - | γ |
| Xt1OR42648.1 | 18 | 12 | 2  | 4 | 5 | - | γ |
| Xt1OR42821.1 | 18 | 26 | 10 | 4 | 5 | - | α |
| Xt1OR43447.1 | 18 | 25 | 2  | 4 | 5 | - | γ |
| Xt1OR43748.1 | 17 | 17 | 3  | 4 | 5 | - | γ |
| Xt1OR43764.1 | 19 | 24 | 9  | 4 | 5 | - | γ |
| Xt1OR43932.1 | 20 | 17 | 23 | 4 | 5 | - | γ |
| Xt1OR43932.2 | 9  | 0  | 2  | 4 | 5 | - | γ |
| Xt1OR49957.1 | 23 | 26 | 21 | 4 | 5 | - | γ |
| Xt1OR51597.1 | 17 | 31 | 25 | 4 | 5 | - | γ |
| Xt1OR55135.1 | 9  | 1  | 14 | 4 | 5 | - | γ |
| Xt1OR56385.1 | 15 | 18 | 7  | 4 | 5 | - | γ |
| Xt1OR58146.1 | 18 | 27 | 7  | 4 | 5 | - | γ |
| Xt1OR60944.1 | 13 | 11 | 2  | 4 | 5 | - | γ |
| Xt1OR72086.1 | 18 | 28 | 4  | 4 | 5 | - | γ |
| Xt1OR30827.2 | 12 | 21 | 2  | 4 | 5 | - | γ |
| Xt1OR37794.2 | 15 | 16 | 0  | 4 | 5 | - | γ |
| Xt1OR49957.1 | 9  | 14 | 1  | 4 | 5 | - | γ |
| Xt1OR27832.2 | 20 | 19 | 28 | 4 | 5 | - | γ |
| Xt1OR42821.1 | 18 | 14 | 1  | 4 | 5 | - | α |
| Xt1OR43932.1 | 11 | 23 | 3  | 4 | 5 | - | γ |
| Xt1OR55135.1 | 18 | 24 | 1  | 4 | 5 | - | γ |
| Xt1OR42561.1 | 24 | 30 | 24 | 4 | 5 | - | γ |
| Xt1OR72086.1 | 16 | 30 | 24 | 4 | 5 | - | γ |
| Xt1OR6017.2  | 20 | 23 | 6  | 4 | - | - | δ |
| Xt1OR6017.3  | 20 | 17 | 6  | 4 | - | - | δ |
| Xt1OR9094.3  | 18 | 16 | 0  | 4 | - | - | δ |
| Xt1OR9183.2  | 12 | 17 | 2  | 4 | - | - | δ |
| Xt1OR9183.3  | 1  | 0  | 0  | 4 | - | - | δ |
| Xt1OR9183.4  | 4  | 0  | 0  | 4 | - | - | δ |
| Xt1OR14152.1 | 17 | 28 | 10 | 4 | - | - | ε |
| Xt1OR18223.2 | 15 | 23 | 3  | 4 | - | - | β |
| Xt1OR23947.1 | 24 | 25 | 19 | 4 | - | - | β |
| Xt1OR26423.1 | 14 | 31 | 22 | 4 | - | - | γ |
| Xt1OR34498.1 | 19 | 36 | 1  | 4 | - | - | γ |
| Xt1OR34965.1 | 20 | 19 | 27 | 4 | - | - | β |
| Xt1OR43348.1 | 12 | 6  | 1  | 4 | - | - | α |
| Xt1OR34498.1 | 15 | 27 | 22 | 4 | - | - | γ |
| Xt1OR6017.2  | 16 | 25 | 0  | 4 | - | - | δ |
| Xt1OR2286.2  | 11 | 12 | 0  | 4 | - | - | β |
| Xt1OR6017.3  | 16 | 15 | 6  | 4 | - | - | δ |
| Xt1OR9094.3  | 26 | 30 | 7  | 4 | - | - | δ |
| Xt1OR9183.2  | 17 | 17 | 1  | 4 | - | - | δ |
| Xt1OR9183.3  | 24 | 31 | 17 | 4 | - | - | δ |
| Xt1OR9183.4  | 21 | 30 | 25 | 4 | - | - | δ |
| Xt1OR18223.2 | 22 | 28 | 28 | 4 | - | - | β |
| Xt1OR23947.1 | 12 | 14 | 2  | 4 | - | - | β |
| Xt1OR34965.1 | 19 | 29 | 0  | 4 | - | - | β |
| Xt1OR34006.1 | 18 | 30 | 0  | 5 | 1 | - | δ |
| Xt1OR11576.2 | 16 | 23 | 0  | 5 | 5 | 5 | δ |
| Xt1OR3578.1  | 25 | 28 | 20 | 5 | - | 5 | δ |
| Xt1OR11576.1 | 15 | 24 | 4  | 5 | - | 5 | δ |
| Xt1OR11576.3 | 15 | 14 | 0  | 5 | - | 5 | δ |
| Xt1OR11576.4 | 21 | 30 | 24 | 5 | - | 5 | δ |
| Xt1OR23967.1 | 12 | 15 | 0  | 5 | - | 5 | δ |

|              |    |    |    |   |   |   |   |
|--------------|----|----|----|---|---|---|---|
| Xt1OR24457.1 | 20 | 14 | 5  | 5 | - | 5 | δ |
| Xt1OR24457.2 | 21 | 27 | 22 | 5 | - | 5 | δ |
| Xt1OR30930.2 | 16 | 22 | 2  | 5 | - | 5 | δ |
| Xt1OR40750.1 | 15 | 1  | 1  | 5 | - | 5 | δ |
| Xt1OR11576.1 | 15 | 5  | 1  | 5 | - | 5 | δ |
| Xt1OR4132.1  | 23 | 26 | 26 | 5 | - | - | ε |
| Xt1OR4132.2  | 25 | 14 | 1  | 5 | - | - | ε |
| Xt1OR9094.2  | 21 | 25 | 11 | 5 | - | - | δ |
| Xt1OR21814.2 | 18 | 15 | 11 | 5 | - | - | δ |
| Xt1OR27949.2 | 20 | 27 | 11 | 5 | - | - | ε |
| Xt1OR30788.1 | 25 | 33 | 20 | 5 | - | - | δ |
| Xt1OR35679.1 | 15 | 16 | 3  | 5 | - | - | ε |
| Xt1OR39249.1 | 21 | 28 | 23 | 5 | - | - | δ |
| Xt1OR53675.1 | 3  | 1  | 0  | 5 | - | - | ε |
| Xt1OR9094.2  | 24 | 36 | 27 | 5 | - | - | δ |
| Xt1OR21814.2 | 14 | 19 | 7  | 5 | - | - | δ |
| Xt1OR65880.1 | 15 | 20 | 3  | - | - | 5 | δ |
| Xt1OR65880.1 | 13 | 20 | 7  | - | - | 5 | δ |
| Xt1OR5329.1  | 16 | 28 | 8  | - | - | - | η |
| Xt1OR5329.2  | 15 | 23 | 6  | - | - | - | η |
| Xt1OR5508.1  | 18 | 18 | 0  | - | - | - | κ |
| Xt1OR36957.1 | 14 | 18 | 2  | - | - | - | θ |
| Xt1OR40237.1 | 20 | 20 | 23 | - | - | - | η |
| Xt1OR5329.1  | 28 | 35 | 17 | - | - | - | η |
| Xt1OR5329.2  | 23 | 38 | 10 | - | - | - | η |
| Xt1OR5508.1  | 3  | 3  | 16 | - | - | - | κ |
| Xt1OR36957.1 | 22 | 30 | 25 | - | - | - | θ |
| Xt1OR40237.1 | 14 | 12 | 4  | - | - | - | η |
