# Supplementary material for: Common peptides shed light on evolution of Olfactory Receptors
Source: PubMed Central journal article supplement (PMC2681464; doi:10.1186/1471-2148-9-91), 2009-05-05
Supplement: 1471-2148-9-91-S4.pdf [file 1471-2148-9-91-S4.pdf]

Legend

|   |                             |
|---|-----------------------------|
| A | Number of A1 CPs            |
| B | Number of A2 novel CPs      |
| C | Number of A3 novel CPs      |
| D | Number of A7 novel CPs      |
| E | Number of chicken novel CPs |
| F | Cluster number A1 CPs       |
| G | Cluster number A2 novel CPs |
| H | Cluster number A3 novel CPs |
| I | Niimura group               |

| Name      | A  | B  | C  | D | E  | F | G | H | I |
|-----------|----|----|----|---|----|---|---|---|---|
| Gg2OR1.2  | 17 | 10 | 18 | 0 | 2  | 1 | 1 | - | α |
| Gg2OR1.3  | 15 | 11 | 17 | 0 | 2  | 1 | 1 | - | α |
| Gg2OR1.7  | 11 | 8  | 10 | 0 | 1  | 1 | 1 | - | α |
| Gg2OR1.8  | 7  | 10 | 9  | 0 | 1  | 1 | 1 | - | α |
| Gg2OR1.12 | 13 | 7  | 5  | 0 | 1  | 1 | 1 | - | α |
| Gg2ORUn.1 | 10 | 9  | 11 | 0 | 2  | 1 | 1 | - | α |
| Gg2OR1.9  | 13 | 5  | 4  | 0 | 0  | 1 | 2 | - | α |
| Gg2OR1.10 | 16 | 7  | 10 | 0 | 4  | 1 | 2 | - | α |
| Gg2OR1.6  | 12 | 4  | 5  | 0 | 1  | 1 | - | - | α |
| Gg2ORUn.1 | 19 | 15 | 6  | 4 | 8  | 2 | 2 | 1 | γ |
| Gg2ORUn.1 | 24 | 13 | 5  | 2 | 9  | 2 | 2 | 1 | γ |
| Gg2ORUn.1 | 24 | 15 | 5  | 2 | 12 | 2 | 2 | 1 | γ |
| Gg2ORUn.1 | 25 | 16 | 4  | 2 | 14 | 2 | 2 | 1 | γ |
| Gg2ORUn.1 | 23 | 20 | 7  | 0 | 12 | 2 | 2 | 1 | γ |
| Gg2ORUn.1 | 24 | 17 | 4  | 2 | 13 | 2 | 2 | 1 | γ |
| Gg2ORUn.1 | 22 | 14 | 4  | 3 | 6  | 2 | 2 | 1 | γ |
| Gg2ORUn.1 | 24 | 13 | 5  | 2 | 8  | 2 | 2 | 1 | γ |
| Gg2ORUn.1 | 19 | 14 | 5  | 5 | 11 | 2 | 2 | 1 | γ |
| Gg2ORUn.1 | 21 | 15 | 4  | 1 | 12 | 2 | 2 | 1 | γ |
| Gg2ORUn.1 | 21 | 17 | 3  | 3 | 8  | 2 | 2 | 1 | γ |
| Gg2ORUn.1 | 24 | 17 | 4  | 3 | 13 | 2 | 2 | 1 | γ |
| Gg2ORUn.1 | 22 | 16 | 3  | 0 | 9  | 2 | 2 | 1 | γ |
| Gg2ORUn.1 | 20 | 17 | 4  | 2 | 15 | 2 | 2 | 1 | γ |
| Gg2ORUn.1 | 23 | 15 | 5  | 2 | 11 | 2 | 2 | 1 | γ |
| Gg2ORUn.1 | 23 | 13 | 4  | 4 | 9  | 2 | 2 | 1 | γ |
| Gg2ORUn.1 | 23 | 11 | 6  | 3 | 8  | 2 | 2 | 1 | γ |
| Gg2ORUn.1 | 20 | 17 | 5  | 2 | 11 | 2 | 2 | 1 | γ |
| Gg2ORUn.1 | 21 | 11 | 4  | 0 | 14 | 2 | 2 | 1 | γ |
| Gg2ORUn.1 | 22 | 12 | 4  | 3 | 10 | 2 | 2 | 1 | γ |
| Gg2ORUn.1 | 23 | 11 | 6  | 3 | 8  | 2 | 2 | 1 | γ |
| Gg2ORUn.1 | 22 | 16 | 4  | 3 | 9  | 2 | 2 | 1 | γ |
| Gg2ORUn.1 | 23 | 18 | 4  | 3 | 15 | 2 | 2 | 1 | γ |
| Gg2ORUn.1 | 23 | 17 | 5  | 3 | 12 | 2 | 2 | 1 | γ |
| Gg2ORUn.1 | 22 | 14 | 5  | 3 | 8  | 2 | 2 | 1 | γ |
| Gg2ORUn.1 | 21 | 10 | 5  | 3 | 9  | 2 | 2 | 1 | γ |
| Gg2ORUn.1 | 22 | 16 | 5  | 2 | 10 | 2 | 2 | 1 | γ |
| Gg2ORUn.1 | 21 | 16 | 5  | 2 | 10 | 2 | 2 | 1 | γ |
| Gg2ORUn.1 | 23 | 19 | 4  | 3 | 13 | 2 | 2 | 1 | γ |
| Gg2ORUn.1 | 24 | 16 | 8  | 3 | 11 | 2 | 2 | 1 | γ |
| Gg2ORUn.1 | 20 | 21 | 4  | 0 | 10 | 2 | 2 | 1 | γ |

|           |    |    |    |   |    |   |   |   |   |
|-----------|----|----|----|---|----|---|---|---|---|
| Gg2ORUn.  | 23 | 11 | 5  | 2 | 7  | 2 | 2 | 1 | Y |
| Gg2ORUn.  | 22 | 18 | 4  | 2 | 11 | 2 | 2 | 1 | Y |
| Gg2ORUn.  | 19 | 14 | 7  | 2 | 7  | 2 | 2 | 1 | Y |
| Gg2ORUn.  | 23 | 16 | 3  | 2 | 12 | 2 | 2 | 1 | Y |
| Gg2ORUn.  | 23 | 13 | 4  | 2 | 14 | 2 | 2 | 1 | Y |
| Gg2ORUn.: | 22 | 20 | 8  | 0 | 7  | 2 | 2 | 2 | Y |
| Gg2ORUn.: | 24 | 15 | 4  | 3 | 7  | 2 | 2 | 2 | Y |
| Gg2ORUn.: | 23 | 18 | 3  | 1 | 7  | 2 | 2 | 2 | Y |
| Gg2OR27.3 | 11 | 25 | 3  | 0 | 0  | 2 | 3 | - | Y |
| Gg2ORUn.  | 23 | 18 | 4  | 2 | 11 | 2 | - | 1 | Y |
| Gg2OR1.1  | 12 | 18 | 2  | 0 | 0  | 3 | 3 | - | Y |
| Gg2OR5.2  | 18 | 14 | 1  | 0 | 1  | 3 | 3 | - | Y |
| Gg2OR5.3  | 16 | 22 | 7  | 0 | 2  | 3 | 3 | - | Y |
| Gg2OR5.4  | 22 | 31 | 4  | 0 | 2  | 3 | 3 | - | Y |
| Gg2OR5.5  | 25 | 36 | 11 | 0 | 0  | 3 | 3 | - | Y |
| Gg2OR5.7  | 27 | 20 | 2  | 0 | 1  | 3 | 3 | - | Y |
| Gg2OR5.8  | 18 | 26 | 6  | 0 | 1  | 3 | 3 | - | Y |
| Gg2OR5.9  | 15 | 20 | 4  | 0 | 5  | 3 | 3 | - | Y |
| Gg2OR5.10 | 16 | 19 | 9  | 0 | 0  | 3 | 3 | - | Y |
| Gg2OR5.11 | 22 | 26 | 6  | 0 | 0  | 3 | 3 | - | Y |
| Gg2OR5.13 | 16 | 19 | 8  | 0 | 5  | 3 | 3 | - | Y |
| Gg2OR5.14 | 16 | 22 | 8  | 0 | 5  | 3 | 3 | - | Y |
| Gg2OR5.15 | 24 | 19 | 3  | 0 | 0  | 3 | 3 | - | Y |
| Gg2OR5.17 | 15 | 19 | 7  | 0 | 6  | 3 | 3 | - | Y |
| Gg2OR5.19 | 21 | 19 | 3  | 0 | 0  | 3 | 3 | - | Y |
| Gg2OR10.1 | 13 | 18 | 1  | 0 | 1  | 3 | 3 | - | Y |
| Gg2OR10.2 | 20 | 21 | 2  | 0 | 0  | 3 | 3 | - | Y |
| Gg2OR10.4 | 18 | 22 | 0  | 0 | 2  | 3 | 3 | - | Y |
| Gg2OR10.5 | 15 | 21 | 1  | 0 | 0  | 3 | 3 | - | Y |
| Gg2OR17.1 | 19 | 27 | 0  | 0 | 1  | 3 | 3 | - | Y |
| Gg2OR27.1 | 18 | 7  | 1  | 0 | 1  | 3 | 3 | - | Y |
| Gg2ORUn.  | 17 | 14 | 2  | 0 | 2  | 3 | 3 | - | Y |
| Gg2ORUn.: | 16 | 13 | 0  | 0 | 1  | 3 | 3 | - | Y |
| Gg2ORUn.  | 19 | 25 | 2  | 0 | 0  | 3 | 3 | - | Y |
| Gg2ORUn.  | 22 | 17 | 5  | 0 | 1  | 3 | 3 | - | Y |
| Gg2ORUn.  | 20 | 20 | 9  | 0 | 0  | 3 | 3 | - | Y |
| Gg2OR10F  | 9  | 16 | 0  | 0 | 1  | 3 | 3 | - | Y |
| Gg2OR10F  | 12 | 21 | 1  | 0 | 0  | 3 | 3 | - | Y |
