# Supplementary material for: Common peptides shed light on evolution of Olfactory Receptors
Source: PubMed Central journal article supplement (PMC2681464; doi:10.1186/1471-2148-9-91), 2009-05-05
Supplement: 1471-2148-9-91-S5.pdf [file 1471-2148-9-91-S5.pdf]

**ancestral (A1) CPs clusters**

| cluster # | CP      | domain |
|-----------|---------|--------|
| 1         | AICNP   | IL2    |
| 1         | ICNPL   | IL2    |
| 1         | NPLRY   | IL2    |
| 2         | AICLPL  | IL2    |
| 2         | ERSLH   | IL1    |
| 2         | FFVFL   | TM2    |
| 2         | IIFSY   | TM5    |
| 2         | KALKT   | TM6    |
| 2         | LACND   | EL2    |
| 2         | LLIIA   | EL1    |
| 2         | LLLVG   | EL2    |
| 2         | LNPII   | TM7    |
| 2         | NPIIY   | TM7    |
| 2         | PLRYH   | IL2    |
| 2         | PMLNP   | TM7    |
| 2         | RLSFC   | EL2    |
| 2         | SLHSP   | EL1    |
| 2         | TCVSH   | TM6    |
| 3         | FLCNL   | TM2    |
| 3         | ICQPL   | IL2    |
| 3         | NNIYG   | EL2    |
| 3         | NPVIY   | TM7    |
| 3         | PMYIF   | IL1    |
| 3         | YCDNWS  | EL2    |
| 4         | DRLIAI  | IL2    |
| 4         | ILLGN   | TM1    |
| 4         | LLGNG   | TM1    |
| 4         | MAIDR   | TM3    |
| 4         | PLINP   | TM7    |
| 4         | RTKEI   | TM7    |
| 4         | TKEIR   | C      |
| 5         | CFVQMFF | TM3    |
| 5         | GFPGL   | N      |
| 5         | ICYPL   | IL2    |
| 5         | ISFLG   | EL1    |
| 5         | KTFSTC  | IL3    |
| 5         | LAVMA   | TM3    |
| 5         | QMFFVH  | TM3    |
| 6         | DRYIA   | IL2    |
| 6         | KALQTC  | IL3    |
| 6         | LHKPM   | IL1    |
| 6         | RYIAI   | IL2    |
| 6         | TCGTHL  | TM6    |
| 6         | YIAIC   | IL2    |
| 7         | AICKP   | IL2    |
| 7         | DLLSE   | TM3    |
| 7         | DRFVA   | IL2    |
| 7         | ICKPL   | IL2    |
| 7         | ILIIC   | EL2    |
| 7         | LHQPM   | IL1    |
| 7         | MAFDR   | TM3    |
| 7         | MALDR   | TM3    |
| 7         | NPLVY   | TM7    |

**zebrafish novel CPs clusters**

| cluster # | CP             | domain |
|-----------|----------------|--------|
| 1         | CTYAVLAYSVTKL  | IL3    |
| 1         | IKYVFC         | EL2    |
| 1         | ITGFDHLQNQKLLG | N      |
| 1         | LAVVDI         | TM2    |
| 1         | LTLMA          | TM3    |
| 1         | NPTVYC         | TM7    |
| 1         | NSSRKQMINTCLSH | IL3    |
| 1         | VSYYSCI        | EL1    |
| 2         | CGNKLWKV       | EL2    |
| 2         | IIPLSLI        | TM5    |
| 2         | ILMLMA         | TM3    |
| 2         | INNAFGL        | EL2    |
| 2         | IRYALF         | TM1    |
| 2         | ISREAC         | EL1    |
| 2         | KLSCDNI        | EL2    |
| 2         | KVYCH          | EL2    |
| 2         | LSVFL          | TM5    |
| 2         | MCGNKL         | EL2    |
| 2         | MLFEN          | N      |
| 2         | PRFLA          | TM3    |
| 2         | SIVRP          | TM3    |
| 2         | TLSRV          | TM6    |
| 2         | VGLSVF         | EL3    |
| 2         | YILIS          | TM2    |
| 3         | SYIKL          | TM5    |
| 4         | GVIQE          | TM6    |
| 4         | IFTYA          | EL2    |
| 4         | LFCSTRTL       | EL2    |
| 4         | LHLIQLGL       | IL3    |
| 4         | QEVIVV         | TM6    |
| 4         | SAKKA          | IL3    |
| 4         | TLRKK          | TM2    |
| 4         | VTPCV          | TM2    |
| 5         | ACLAN          | EL1    |
| 5         | CDHGP          | EL2    |
| 5         | EGRLK          | IL3    |
| 5         | FNLALAD        | TM2    |
| 5         | GETNA          | TM2    |
| 5         | GLSGI          | N      |
| 5         | KITTWE         | IL3    |
| 5         | LALADI         | TM2    |
| 5         | MVSLI          | EL2    |
| 5         | NMFFV          | TM3    |
| 5         | PEYFF          | N      |
| 5         | QSFTLV         | TM3    |
| 5         | RLKAL          | IL3    |
| 5         | SQYISYN        | EL1    |
| 5         | YYYIFL         | TM1    |
| 6         | DRLVAIC        | IL2    |
| 6         | QSLTL          | TM3    |

|    |        |     |
|----|--------|-----|
| 7  | PMYIL  | IL1 |
| 7  | PVLNP  | TM7 |
| 7  | SLEFL  | TM6 |
| 7  | SYVKI  | TM5 |
| 7  | TCIPH  | TM6 |
| 8  | AICRPL | IL2 |
| 8  | DRYVA  | IL2 |
| 8  | LHEPM  | IL1 |
| 8  | LNPLI  | TM7 |
| 8  | LTVMA  | TM3 |
| 8  | MAYDR  | TM3 |
| 8  | MSYDR  | TM3 |
| 8  | NNVFG  | EL2 |
| 8  | NPLIY  | TM7 |
| 8  | RYVAI  | IL2 |
| 8  | TCLPH  | TM6 |
| 8  | VMAYD  | TM3 |
| 8  | YVAIC  | IL2 |
| 9  | TCTSH  | TM6 |
| 9  | TVLGN  | TM1 |
| 10 | ICFPL  | IL2 |
| 10 | LYVNG  | TM2 |
| 10 | PLIYG  | TM7 |
