# Supplementary material for: Common peptides shed light on evolution of Olfactory Receptors
Source: PubMed Central journal article supplement (PMC2681464; doi:10.1186/1471-2148-9-91), 2009-05-05
Supplement: 1471-2148-9-91-S8.pdf [file 1471-2148-9-91-S8.pdf]

## Legend

|   |                                |
|---|--------------------------------|
| A | Number of A1 CPs               |
| B | Number of A2 novel CPs         |
| C | Number of A3 novel CPs         |
| D | Number of A4 novel CPs         |
| E | Number of A5 novel CPs         |
| F | Number of A6 novel CPs         |
| G | Number of mouse novel CPs      |
| H | Cluster number A4 novel CPs    |
| I | Cluster number A5 novel CPs    |
| J | Cluster number mouse novel CPs |
| K | Family                         |

| Name      | A  | B  | C | D  | E  | F | G | H | I  | J | K |
|-----------|----|----|---|----|----|---|---|---|----|---|---|
| MOR245-1  | 17 | 11 | 7 | 5  | 5  | 0 | 0 | 1 | 10 | - | 4 |
| MOR245-22 | 16 | 10 | 5 | 5  | 5  | 0 | 0 | 1 | 10 | - | 4 |
| MOR245-18 | 9  | 13 | 5 | 6  | 3  | 0 | 0 | 1 | -  | - | 4 |
| MOR245-20 | 17 | 10 | 6 | 5  | 4  | 0 | 1 | 1 | -  | - | 4 |
| MOR245-11 | 10 | 12 | 8 | 6  | 3  | 0 | 0 | 1 | -  | - | 4 |
| MOR240-3  | 16 | 18 | 7 | 6  | 1  | 0 | 0 | 1 | -  | - | 4 |
| MOR240-1  | 12 | 15 | 9 | 6  | 3  | 1 | 0 | 1 | -  | - | 4 |
| MOR239-7  | 20 | 17 | 5 | 5  | 0  | 4 | 0 | 1 | -  | - | 4 |
| MOR239-2  | 19 | 16 | 5 | 5  | 1  | 4 | 0 | 1 | -  | - | 4 |
| MOR239-1  | 21 | 17 | 7 | 6  | 0  | 4 | 0 | 1 | -  | - | 4 |
| MOR239-4  | 15 | 20 | 5 | 5  | 1  | 2 | 0 | 1 | -  | - | 4 |
| MOR112-2  | 22 | 22 | 2 | 5  | 6  | 0 | 0 | 2 | 8  | - | 6 |
| MOR114-14 | 24 | 23 | 2 | 10 | 16 | 0 | 0 | 2 | 8  | - | 6 |
| MOR111-13 | 23 | 26 | 3 | 8  | 6  | 0 | 1 | 2 | 8  | - | 6 |
| MOR111-4  | 22 | 21 | 3 | 8  | 5  | 0 | 0 | 2 | 8  | - | 6 |
| MOR111-10 | 22 | 21 | 2 | 9  | 11 | 0 | 0 | 2 | 8  | - | 6 |
| MOR114-11 | 21 | 19 | 2 | 8  | 12 | 1 | 1 | 2 | 8  | - | 6 |
| MOR114-12 | 20 | 18 | 5 | 7  | 13 | 1 | 0 | 2 | 8  | - | 6 |
| MOR110-9  | 19 | 18 | 2 | 9  | 7  | 1 | 2 | 2 | 8  | - | 6 |
| MOR110-6  | 21 | 22 | 2 | 12 | 8  | 1 | 1 | 2 | 8  | - | 6 |
| MOR108-1  | 25 | 22 | 3 | 7  | 5  | 0 | 0 | 2 | 8  | - | 6 |
| MOR117-1  | 23 | 13 | 1 | 5  | 5  | 0 | 0 | 2 | 8  | - | 6 |
| MOR109-1  | 21 | 26 | 3 | 8  | 8  | 1 | 0 | 2 | 8  | - | 6 |
| MOR111-12 | 20 | 20 | 2 | 10 | 8  | 1 | 0 | 2 | 8  | - | 6 |
| MOR114-7  | 20 | 16 | 3 | 6  | 9  | 0 | 0 | 2 | 8  | - | 6 |
| MOR114-8  | 22 | 15 | 2 | 5  | 8  | 1 | 0 | 2 | 8  | - | 6 |
| MOR111-3  | 17 | 27 | 5 | 7  | 8  | 1 | 0 | 2 | 8  | - | 6 |
| MOR110-1  | 23 | 19 | 2 | 12 | 9  | 1 | 2 | 2 | 8  | - | 6 |
| MOR110-2  | 20 | 19 | 3 | 9  | 7  | 1 | 2 | 2 | 8  | - | 6 |
| MOR110-7  | 21 | 15 | 4 | 5  | 9  | 1 | 1 | 2 | 8  | - | 6 |
| MOR110-10 | 21 | 20 | 1 | 11 | 5  | 0 | 1 | 2 | 8  | - | 6 |
| MOR114-3  | 16 | 13 | 5 | 5  | 9  | 0 | 0 | 2 | 8  | - | 6 |
| MOR113-3  | 19 | 19 | 1 | 7  | 5  | 1 | 1 | 2 | 8  | - | 6 |
| MOR114-1  | 21 | 19 | 5 | 7  | 15 | 1 | 0 | 2 | 8  | - | 6 |
| MOR114-9  | 20 | 16 | 3 | 6  | 8  | 0 | 0 | 2 | 8  | - | 6 |
| MOR111-2  | 19 | 23 | 2 | 6  | 10 | 1 | 1 | 2 | 8  | - | 6 |
| MOR111-5  | 25 | 20 | 5 | 9  | 6  | 0 | 0 | 2 | 8  | - | 6 |
| MOR114-5  | 22 | 14 | 3 | 6  | 9  | 2 | 0 | 2 | 8  | - | 6 |
| MOR113-8  | 19 | 20 | 1 | 7  | 6  | 1 | 1 | 2 | 8  | - | 6 |
| MOR110-4  | 21 | 21 | 2 | 12 | 2  | 1 | 2 | 2 | -  | - | 6 |
| MOR112-1  | 26 | 21 | 3 | 12 | 4  | 1 | 0 | 2 | -  | - | 6 |
| MOR115-1  | 21 | 23 | 1 | 11 | 4  | 0 | 0 | 2 | -  | - | 6 |

|           |    |    |    |    |   |   |   |   |    |   |    |
|-----------|----|----|----|----|---|---|---|---|----|---|----|
| MOR116-1  | 23 | 18 | 0  | 9  | 3 | 0 | 0 | 2 | -  | - | 6  |
| MOR108-4  | 22 | 19 | 4  | 9  | 4 | 1 | 0 | 2 | -  | - | 6  |
| MOR110-3  | 19 | 20 | 3  | 13 | 4 | 1 | 2 | 2 | -  | - | 6  |
| MOR111-1  | 25 | 22 | 6  | 8  | 2 | 0 | 0 | 2 | -  | - | 6  |
| MOR115-4  | 23 | 23 | 1  | 11 | 4 | 0 | 0 | 2 | -  | - | 6  |
| MOR113-4  | 18 | 21 | 2  | 6  | 3 | 1 | 0 | 2 | -  | - | 6  |
| MOR108-3  | 22 | 21 | 4  | 9  | 2 | 1 | 0 | 2 | -  | - | 6  |
| MOR171-8  | 18 | 33 | 7  | 5  | 6 | 0 | 1 | 3 | 12 | - | 8  |
| MOR171-47 | 17 | 31 | 7  | 5  | 7 | 1 | 1 | 3 | 12 | - | 8  |
| MOR200-1  | 23 | 25 | 5  | 5  | 3 | 0 | 0 | 3 | -  | - | 5  |
| MOR277-1  | 19 | 21 | 1  | 6  | 2 | 1 | 0 | 3 | -  | - | 2  |
| MOR199-1  | 16 | 27 | 3  | 5  | 3 | 1 | 0 | 3 | -  | - | 5  |
| MOR199-2  | 15 | 25 | 3  | 5  | 3 | 1 | 0 | 3 | -  | - | 5  |
| MOR278-1  | 18 | 15 | 2  | 6  | 0 | 2 | 0 | 3 | -  | - | 2  |
| MOR278-2  | 21 | 17 | 3  | 9  | 0 | 0 | 0 | 3 | -  | - | 2  |
| MOR32-12  | 14 | 6  | 15 | 5  | 5 | 0 | 0 | 4 | 1  | - | 52 |
| MOR31-4   | 11 | 10 | 5  | 5  | 5 | 0 | 0 | 4 | 1  | - | 52 |
| MOR31-12  | 12 | 11 | 8  | 6  | 8 | 0 | 0 | 4 | 1  | - | 52 |
| MOR31-8   | 17 | 6  | 9  | 7  | 7 | 0 | 0 | 4 | 1  | - | 52 |
| MOR32-11  | 18 | 12 | 11 | 6  | 5 | 0 | 0 | 4 | 1  | - | 52 |
| MOR32-10  | 20 | 11 | 13 | 7  | 9 | 0 | 0 | 4 | 1  | - | 52 |
| MOR32-5   | 22 | 7  | 14 | 5  | 5 | 0 | 0 | 4 | 1  | - | 52 |
| MOR34-12  | 6  | 9  | 6  | 6  | 5 | 0 | 0 | 4 | 3  | - | 52 |
| MOR34-3   | 11 | 4  | 9  | 6  | 5 | 1 | 0 | 4 | 3  | - | 52 |
| MOR34-5   | 9  | 9  | 9  | 8  | 6 | 0 | 0 | 4 | 3  | - | 52 |
| MOR13-3   | 15 | 9  | 5  | 8  | 5 | 1 | 0 | 4 | 5  | - | 51 |
| MOR32-4   | 21 | 8  | 16 | 5  | 5 | 0 | 0 | 4 | 5  | - | 52 |
| MOR5-1    | 10 | 10 | 5  | 5  | 6 | 0 | 0 | 4 | 5  | - | 51 |
| MOR7-1    | 13 | 10 | 10 | 5  | 5 | 0 | 0 | 4 | 5  | - | 51 |
| MOR17-2   | 14 | 6  | 10 | 6  | 5 | 0 | 0 | 4 | 5  | - | 51 |
| MOR8-5    | 10 | 10 | 6  | 5  | 7 | 0 | 0 | 4 | 5  | - | 51 |
| MOR6-1    | 11 | 6  | 7  | 8  | 7 | 0 | 0 | 4 | 5  | - | 51 |
| MOR5-2    | 9  | 9  | 5  | 5  | 6 | 0 | 1 | 4 | 5  | - | 51 |
| MOR10-1   | 14 | 7  | 9  | 7  | 5 | 0 | 0 | 4 | 5  | - | 51 |
| MOR17-1   | 14 | 7  | 9  | 9  | 6 | 0 | 0 | 4 | 5  | - | 51 |
| MOR10-2   | 9  | 8  | 13 | 6  | 5 | 0 | 0 | 4 | 6  | - | 51 |
| MOR24-4   | 11 | 8  | 8  | 5  | 1 | 0 | 0 | 4 | -  | - | 52 |
| MOR18-2   | 11 | 6  | 4  | 7  | 1 | 0 | 0 | 4 | -  | - | 51 |
| MOR31-2   | 15 | 9  | 10 | 7  | 3 | 0 | 0 | 4 | -  | - | 52 |
| MOR18-1   | 19 | 8  | 4  | 6  | 2 | 0 | 0 | 4 | -  | - | 51 |
| MOR31-6   | 12 | 10 | 9  | 8  | 4 | 0 | 0 | 4 | -  | - | 52 |
| MOR33-1   | 18 | 10 | 10 | 5  | 1 | 2 | 0 | 4 | -  | - | 52 |
| MOR27-1   | 19 | 8  | 10 | 5  | 0 | 0 | 0 | 4 | -  | - | 52 |
| MOR22-1   | 14 | 9  | 10 | 8  | 4 | 0 | 0 | 4 | -  | - | 52 |
| MOR30-2   | 11 | 9  | 11 | 6  | 1 | 0 | 0 | 4 | -  | - | 52 |
| MOR23-2   | 13 | 8  | 11 | 5  | 2 | 0 | 0 | 4 | -  | - | 52 |
| MOR22-2   | 13 | 7  | 6  | 8  | 2 | 0 | 0 | 4 | -  | - | 52 |
| MOR1-3    | 10 | 4  | 6  | 5  | 2 | 0 | 0 | 4 | -  | - | 51 |
| MOR1-1    | 10 | 4  | 8  | 6  | 0 | 0 | 0 | 4 | -  | - | 51 |
| MOR34-4   | 10 | 9  | 6  | 5  | 4 | 1 | 0 | 4 | -  | - | 52 |
| MOR32-13  | 9  | 12 | 11 | 7  | 2 | 0 | 0 | 4 | -  | - | 52 |
| MOR23-5   | 12 | 8  | 10 | 5  | 3 | 0 | 0 | 4 | -  | - | 52 |
| MOR26-3   | 10 | 8  | 8  | 7  | 2 | 1 | 0 | 4 | -  | - | 52 |
| MOR24-3   | 10 | 4  | 10 | 7  | 4 | 0 | 0 | 4 | -  | - | 52 |
| MOR31-5   | 16 | 7  | 9  | 6  | 4 | 0 | 1 | 4 | -  | - | 52 |
| MOR23-6   | 12 | 8  | 10 | 5  | 3 | 0 | 0 | 4 | -  | - | 52 |

|           |    |    |    |   |   |   |   |   |    |   |    |
|-----------|----|----|----|---|---|---|---|---|----|---|----|
| MOR37-2   | 14 | 7  | 8  | 6 | 1 | 0 | 0 | 4 | -  | - | 52 |
| MOR24-2   | 13 | 9  | 8  | 8 | 1 | 0 | 0 | 4 | -  | - | 52 |
| MOR22-4   | 13 | 9  | 9  | 8 | 4 | 0 | 0 | 4 | -  | - | 52 |
| MOR31-13  | 11 | 9  | 4  | 6 | 1 | 0 | 0 | 4 | -  | - | 52 |
| MOR13-5   | 14 | 6  | 4  | 8 | 4 | 0 | 0 | 4 | -  | - | 51 |
| MOR32-8   | 22 | 7  | 18 | 5 | 4 | 0 | 1 | 4 | -  | - | 52 |
| MOR9-2    | 7  | 8  | 8  | 5 | 4 | 1 | 0 | 4 | -  | - | 51 |
| MOR32-1   | 16 | 10 | 14 | 6 | 3 | 0 | 0 | 4 | -  | - | 52 |
| MOR3-1    | 13 | 3  | 4  | 5 | 2 | 2 | 0 | 4 | -  | - | 51 |
| MOR13-6   | 16 | 4  | 4  | 6 | 4 | 0 | 0 | 4 | -  | - | 51 |
| MOR26-1   | 12 | 9  | 7  | 6 | 2 | 1 | 0 | 4 | -  | - | 52 |
| MOR24-5   | 11 | 5  | 10 | 8 | 3 | 0 | 0 | 4 | -  | - | 52 |
| MOR34-11  | 8  | 3  | 5  | 5 | 4 | 1 | 0 | 4 | -  | - | 52 |
| MOR256-64 | 18 | 26 | 8  | 5 | 0 | 0 | 0 | 5 | -  | - | 2  |
| MOR256-15 | 14 | 32 | 3  | 5 | 3 | 0 | 0 | 5 | -  | - | 2  |
| MOR256-8  | 19 | 18 | 4  | 7 | 0 | 0 | 0 | 5 | -  | - | 2  |
| MOR256-12 | 21 | 27 | 5  | 6 | 0 | 0 | 0 | 5 | -  | - | 2  |
| MOR256-13 | 18 | 26 | 4  | 5 | 0 | 0 | 0 | 5 | -  | - | 2  |
| MOR256-47 | 21 | 26 | 8  | 5 | 0 | 0 | 0 | 5 | -  | - | 2  |
| MOR256-51 | 17 | 21 | 3  | 6 | 0 | 0 | 0 | 5 | -  | - | 2  |
| MOR256-61 | 15 | 27 | 2  | 8 | 1 | 0 | 1 | 5 | -  | - | 2  |
| MOR256-33 | 12 | 28 | 4  | 6 | 0 | 0 | 1 | 5 | -  | - | 2  |
| MOR256-19 | 11 | 28 | 4  | 6 | 0 | 0 | 1 | 5 | -  | - | 2  |
| MOR256-9  | 15 | 23 | 5  | 5 | 0 | 0 | 1 | 5 | -  | - | 2  |
| MOR256-31 | 15 | 24 | 3  | 8 | 1 | 0 | 1 | 5 | -  | - | 2  |
| MOR256-11 | 20 | 27 | 2  | 5 | 3 | 0 | 0 | 5 | -  | - | 2  |
| MOR204-8  | 21 | 33 | 2  | 6 | 6 | 3 | 5 | 6 | 2  | 2 | 5  |
| MOR204-7  | 18 | 21 | 3  | 5 | 5 | 3 | 6 | 6 | 2  | 2 | 5  |
| MOR204-16 | 22 | 31 | 4  | 5 | 4 | 2 | 5 | 6 | -  | 2 | 5  |
| MOR204-35 | 15 | 31 | 2  | 7 | 3 | 3 | 5 | 6 | -  | 2 | 5  |
| MOR204-10 | 22 | 27 | 3  | 5 | 3 | 2 | 7 | 6 | -  | 2 | 5  |
| MOR204-12 | 16 | 27 | 3  | 5 | 3 | 1 | 5 | 6 | -  | 2 | 5  |
| MOR204-9  | 19 | 27 | 2  | 6 | 3 | 1 | 6 | 6 | -  | 2 | 5  |
| MOR204-13 | 17 | 27 | 3  | 7 | 3 | 2 | 3 | 6 | -  | - | 5  |
| MOR204-38 | 14 | 27 | 2  | 5 | 0 | 1 | 2 | 6 | -  | - | 5  |
| MOR204-11 | 23 | 30 | 3  | 6 | 2 | 1 | 0 | 6 | -  | - | 5  |
| MOR204-33 | 18 | 29 | 2  | 7 | 0 | 1 | 2 | 6 | -  | - | 5  |
| MOR204-6  | 16 | 34 | 3  | 7 | 2 | 0 | 0 | 6 | -  | - | 5  |
| MOR204-29 | 18 | 25 | 3  | 6 | 3 | 1 | 3 | 6 | -  | - | 5  |
| MOR204-19 | 13 | 25 | 4  | 6 | 2 | 1 | 2 | 6 | -  | - | 5  |
| MOR204-32 | 17 | 32 | 4  | 5 | 2 | 0 | 0 | 6 | -  | - | 5  |
| MOR40-1   | 16 | 2  | 3  | 9 | 5 | 0 | 1 | 7 | -  | - | 56 |
| MOR40-15  | 13 | 8  | 1  | 6 | 2 | 0 | 0 | 7 | -  | - | 56 |
| MOR40-13  | 13 | 7  | 1  | 6 | 2 | 1 | 0 | 7 | -  | - | 56 |
| MOR38-2   | 13 | 4  | 3  | 5 | 1 | 0 | 0 | 7 | -  | - | 52 |
| MOR40-17  | 16 | 2  | 3  | 9 | 4 | 0 | 1 | 7 | -  | - | 56 |
| MOR40-14  | 13 | 2  | 4  | 9 | 6 | 0 | 0 | 7 | -  | - | 56 |
| MOR40-2   | 13 | 3  | 4  | 9 | 6 | 0 | 0 | 7 | -  | - | 56 |
| MOR40-4   | 13 | 4  | 2  | 5 | 1 | 0 | 0 | 7 | -  | - | 56 |
| MOR185-4  | 19 | 30 | 4  | 6 | 6 | 0 | 0 | 8 | 2  | - | 8  |
| MOR185-6  | 18 | 33 | 5  | 6 | 5 | 1 | 0 | 8 | 2  | - | 8  |
| MOR185-11 | 13 | 29 | 6  | 5 | 5 | 0 | 1 | 8 | 12 | - | 8  |
| MOR196-2  | 17 | 34 | 5  | 6 | 1 | 1 | 0 | 8 | -  | - | 5  |
| MOR185-3  | 11 | 34 | 6  | 7 | 3 | 1 | 0 | 8 | -  | - | 8  |
| MOR185-2  | 18 | 32 | 7  | 5 | 3 | 0 | 0 | 8 | -  | - | 8  |
| MOR274-1  | 16 | 23 | 1  | 6 | 6 | 0 | 0 | 8 | -  | - | 2  |

|           |    |    |    |    |    |   |   |    |    |   |    |
|-----------|----|----|----|----|----|---|---|----|----|---|----|
| MOR185-12 | 19 | 22 | 6  | 6  | 1  | 0 | 1 | 8  | -  | - | 8  |
| MOR171-52 | 25 | 34 | 6  | 9  | 2  | 0 | 0 | 8  | -  | - | 8  |
| MOR185-5  | 22 | 23 | 5  | 6  | 1  | 0 | 1 | 8  | -  | - | 8  |
| MOR256-59 | 17 | 22 | 0  | 5  | 3  | 0 | 1 | 8  | -  | - | 2  |
| MOR187-4  | 16 | 28 | 4  | 7  | 1  | 0 | 1 | 8  | -  | - | 8  |
| MOR256-3  | 13 | 29 | 3  | 6  | 3  | 0 | 0 | 8  | -  | - | 2  |
| MOR275-1  | 18 | 21 | 1  | 7  | 3  | 1 | 0 | 8  | -  | - | 2  |
| MOR276-1  | 19 | 19 | 2  | 6  | 1  | 2 | 0 | 8  | -  | - | 2  |
| MOR256-60 | 22 | 25 | 2  | 7  | 4  | 1 | 0 | 8  | -  | - | 2  |
| MOR256-35 | 22 | 27 | 2  | 7  | 3  | 1 | 0 | 8  | -  | - | 2  |
| MOR256-7  | 18 | 22 | 0  | 5  | 3  | 0 | 1 | 8  | -  | - | 2  |
| MOR256-55 | 13 | 27 | 5  | 6  | 6  | 0 | 0 | 9  | 1  | - | 2  |
| MOR256-25 | 9  | 27 | 6  | 6  | 6  | 0 | 0 | 9  | 1  | - | 2  |
| MOR268-2  | 17 | 25 | 1  | 5  | 2  | 2 | 3 | 9  | -  | - | 10 |
| MOR264-17 | 24 | 21 | 3  | 6  | 1  | 0 | 1 | 9  | -  | - | 10 |
| MOR256-2  | 14 | 20 | 2  | 7  | 2  | 0 | 0 | 9  | -  | - | 2  |
| MOR264-22 | 20 | 29 | 1  | 5  | 0  | 0 | 1 | 9  | -  | - | 10 |
| MOR256-30 | 21 | 12 | 4  | 5  | 0  | 0 | 0 | 9  | -  | - | 2  |
| MOR265-1  | 17 | 22 | 0  | 5  | 3  | 0 | 0 | 9  | -  | - | 10 |
| MOR256-56 | 11 | 25 | 2  | 5  | 3  | 0 | 2 | 9  | -  | - | 2  |
| MOR256-41 | 9  | 33 | 7  | 6  | 5  | 0 | 0 | 9  | -  | - | 2  |
| MOR256-27 | 13 | 24 | 5  | 5  | 4  | 0 | 1 | 9  | -  | - | 2  |
| MOR188-3  | 17 | 22 | 5  | 5  | 5  | 0 | 0 | 10 | 4  | - | 8  |
| MOR171-16 | 22 | 35 | 10 | 6  | 11 | 0 | 1 | 10 | 12 | - | 8  |
| MOR171-7  | 20 | 29 | 7  | 5  | 13 | 0 | 1 | 10 | 12 | - | 8  |
| MOR171-13 | 21 | 36 | 8  | 5  | 10 | 1 | 0 | 10 | 12 | - | 8  |
| MOR171-17 | 23 | 32 | 6  | 5  | 6  | 0 | 0 | 10 | 12 | - | 8  |
| MOR171-14 | 23 | 33 | 9  | 6  | 11 | 2 | 0 | 10 | 12 | - | 8  |
| MOR171-48 | 22 | 30 | 9  | 5  | 16 | 0 | 0 | 10 | 12 | - | 8  |
| MOR189-1  | 18 | 28 | 5  | 5  | 5  | 0 | 0 | 10 | 12 | - | 8  |
| MOR171-10 | 19 | 27 | 7  | 5  | 3  | 0 | 1 | 10 | -  | - | 8  |
| MOR171-11 | 23 | 26 | 7  | 5  | 3  | 0 | 1 | 10 | -  | - | 8  |
| MOR188-8  | 15 | 24 | 2  | 8  | 2  | 0 | 0 | 10 | -  | - | 8  |
| MOR189-3  | 18 | 28 | 3  | 7  | 4  | 0 | 0 | 10 | -  | - | 8  |
| MOR193-1  | 17 | 16 | 3  | 5  | 2  | 0 | 0 | 10 | -  | - | 8  |
| MOR188-2  | 20 | 24 | 1  | 6  | 4  | 1 | 0 | 10 | -  | - | 8  |
| MOR187-1  | 19 | 23 | 9  | 5  | 3  | 0 | 1 | 10 | -  | - | 8  |
| MOR188-9  | 14 | 25 | 1  | 6  | 2  | 0 | 0 | 10 | -  | - | 8  |
| MOR189-2  | 15 | 29 | 5  | 6  | 4  | 0 | 1 | 10 | -  | - | 8  |
| MOR191-1  | 14 | 27 | 5  | 5  | 2  | 0 | 0 | 10 | -  | - | 8  |
| MOR187-5  | 19 | 23 | 9  | 5  | 3  | 0 | 1 | 10 | -  | - | 8  |
| MOR228-3  | 23 | 24 | 5  | 5  | 0  | 0 | 0 | 11 | -  | - | 4  |
| MOR230-2  | 25 | 14 | 6  | 7  | 4  | 3 | 0 | 11 | -  | - | 4  |
| MOR225-6  | 27 | 20 | 6  | 5  | 0  | 1 | 1 | 11 | -  | - | 4  |
| MOR232-1  | 22 | 22 | 7  | 10 | 2  | 0 | 0 | 11 | -  | - | 4  |
| MOR238-1  | 19 | 16 | 3  | 5  | 1  | 0 | 0 | 11 | -  | - | 4  |
| MOR232-7  | 22 | 26 | 6  | 11 | 3  | 0 | 1 | 11 | -  | - | 4  |
| MOR232-6  | 24 | 25 | 6  | 11 | 2  | 0 | 1 | 11 | -  | - | 4  |
| MOR230-1  | 24 | 13 | 6  | 6  | 3  | 2 | 0 | 11 | -  | - | 4  |
| MOR231-13 | 23 | 22 | 5  | 9  | 0  | 4 | 1 | 11 | -  | - | 4  |
| MOR232-3  | 27 | 23 | 8  | 11 | 0  | 0 | 0 | 11 | -  | - | 4  |
| MOR225-13 | 13 | 14 | 3  | 6  | 1  | 1 | 0 | 11 | -  | - | 4  |
| MOR230-6  | 25 | 15 | 7  | 11 | 2  | 1 | 0 | 11 | -  | - | 4  |
| MOR231-2  | 22 | 18 | 5  | 10 | 3  | 2 | 0 | 11 | -  | - | 4  |
| MOR234-3  | 24 | 17 | 5  | 9  | 1  | 0 | 0 | 11 | -  | - | 4  |
| MOR230-3  | 24 | 13 | 10 | 10 | 3  | 4 | 0 | 11 | -  | - | 4  |

|           |    |    |    |    |   |   |   |    |    |   |    |
|-----------|----|----|----|----|---|---|---|----|----|---|----|
| MOR230-5  | 21 | 15 | 13 | 10 | 1 | 2 | 0 | 11 | -  | - | 4  |
| MOR174-10 | 16 | 28 | 3  | 5  | 4 | 0 | 0 | 11 | -  | - | 5  |
| MOR233-18 | 23 | 17 | 7  | 5  | 0 | 0 | 1 | 11 | -  | - | 4  |
| MOR234-1  | 24 | 19 | 4  | 9  | 2 | 0 | 0 | 11 | -  | - | 4  |
| MOR235-2  | 27 | 16 | 6  | 8  | 1 | 0 | 0 | 11 | -  | - | 4  |
| MOR231-3  | 27 | 24 | 8  | 8  | 2 | 2 | 0 | 11 | -  | - | 4  |
| MOR232-5  | 23 | 25 | 5  | 8  | 1 | 0 | 0 | 11 | -  | - | 4  |
| MOR232-2  | 27 | 26 | 5  | 10 | 0 | 0 | 0 | 11 | -  | - | 4  |
| MOR233-11 | 20 | 24 | 7  | 6  | 3 | 2 | 2 | 11 | -  | - | 4  |
| MOR233-22 | 20 | 18 | 8  | 8  | 0 | 2 | 2 | 11 | -  | - | 4  |
| MOR231-12 | 27 | 17 | 7  | 8  | 1 | 1 | 0 | 11 | -  | - | 4  |
| MOR231-10 | 25 | 15 | 5  | 8  | 0 | 3 | 1 | 11 | -  | - | 4  |
| MOR228-2  | 25 | 26 | 5  | 5  | 0 | 0 | 0 | 11 | -  | - | 4  |
| MOR232-4  | 24 | 21 | 7  | 8  | 2 | 1 | 0 | 11 | -  | - | 4  |
| MOR225-2  | 22 | 5  | 4  | 7  | 1 | 3 | 0 | 11 | -  | - | 4  |
| MOR231-8  | 26 | 13 | 5  | 9  | 1 | 4 | 1 | 11 | -  | - | 4  |
| MOR230-7  | 28 | 20 | 9  | 10 | 1 | 2 | 0 | 11 | -  | - | 4  |
| MOR233-9  | 19 | 22 | 4  | 5  | 2 | 1 | 1 | 11 | -  | - | 4  |
| MOR233-12 | 18 | 17 | 6  | 6  | 1 | 1 | 2 | 11 | -  | - | 4  |
| MOR231-9  | 24 | 14 | 5  | 6  | 1 | 2 | 2 | 11 | -  | - | 4  |
| MOR237-2  | 19 | 17 | 5  | 8  | 0 | 0 | 0 | 11 | -  | - | 4  |
| MOR235-1  | 21 | 15 | 7  | 6  | 1 | 1 | 0 | 11 | -  | - | 4  |
| MOR231-6  | 24 | 15 | 4  | 10 | 0 | 5 | 0 | 11 | -  | - | 4  |
| MOR231-1  | 25 | 17 | 4  | 6  | 2 | 2 | 0 | 11 | -  | - | 4  |
| MOR231-18 | 23 | 16 | 6  | 6  | 1 | 1 | 2 | 11 | -  | - | 4  |
| MOR231-14 | 27 | 19 | 3  | 8  | 0 | 2 | 0 | 11 | -  | - | 4  |
| MOR230-8  | 25 | 15 | 9  | 9  | 1 | 2 | 0 | 11 | -  | - | 4  |
| MOR232-9  | 24 | 22 | 7  | 7  | 1 | 1 | 0 | 11 | -  | - | 4  |
| MOR225-4  | 19 | 13 | 3  | 5  | 1 | 2 | 0 | 11 | -  | - | 4  |
| MOR231-11 | 29 | 21 | 7  | 8  | 1 | 3 | 2 | 11 | -  | - | 4  |
| MOR233-7  | 24 | 26 | 11 | 6  | 1 | 0 | 0 | 11 | -  | - | 4  |
| MOR231-4  | 22 | 13 | 5  | 5  | 0 | 2 | 1 | 11 | -  | - | 4  |
| MOR233-4  | 22 | 24 | 7  | 6  | 2 | 3 | 1 | 11 | -  | - | 4  |
| MOR237-1  | 21 | 21 | 4  | 8  | 0 | 1 | 1 | 11 | -  | - | 4  |
| MOR230-11 | 21 | 15 | 7  | 10 | 2 | 1 | 0 | 11 | -  | - | 4  |
| MOR264-25 | 23 | 34 | 5  | 6  | 5 | 0 | 2 | 12 | 9  | - | 13 |
| MOR136-7  | 25 | 28 | 1  | 5  | 6 | 2 | 5 | 12 | 11 | 3 | 1  |
| MOR136-13 | 26 | 29 | 0  | 7  | 7 | 0 | 0 | 12 | 11 | - | 1  |
| MOR135-29 | 19 | 31 | 7  | 6  | 8 | 4 | 2 | 12 | 11 | - | 1  |
| MOR135-11 | 23 | 34 | 6  | 6  | 8 | 3 | 2 | 12 | 11 | - | 1  |
| MOR135-12 | 19 | 31 | 7  | 6  | 8 | 4 | 2 | 12 | 11 | - | 1  |
| MOR139-4  | 13 | 27 | 4  | 6  | 6 | 2 | 0 | 12 | 12 | - | 7  |
| MOR144-1  | 18 | 32 | 2  | 7  | 2 | 1 | 0 | 12 | -  | - | 7  |
| MOR131-1  | 25 | 36 | 2  | 6  | 1 | 0 | 1 | 12 | -  | - | 1  |
| MOR138-1  | 18 | 31 | 3  | 5  | 3 | 0 | 0 | 12 | -  | - | 1  |
| MOR138-7  | 18 | 30 | 4  | 5  | 2 | 0 | 0 | 12 | -  | - | 1  |
| MOR141-1  | 23 | 35 | 1  | 7  | 2 | 3 | 1 | 12 | -  | - | 7  |
| MOR153-1  | 17 | 20 | 3  | 5  | 1 | 2 | 1 | 12 | -  | - | 7  |
| MOR139-6  | 20 | 26 | 5  | 7  | 2 | 2 | 0 | 12 | -  | - | 7  |
| MOR139-1  | 21 | 38 | 4  | 8  | 6 | 2 | 0 | 12 | -  | - | 7  |
| MOR132-1  | 25 | 27 | 3  | 5  | 1 | 0 | 0 | 12 | -  | - | 1  |
| MOR152-3  | 13 | 22 | 1  | 7  | 3 | 3 | 0 | 12 | -  | - | 7  |
| MOR128-4  | 19 | 32 | 3  | 6  | 1 | 3 | 0 | 12 | -  | - | 1  |
| MOR139-3  | 17 | 35 | 4  | 5  | 4 | 2 | 0 | 12 | -  | - | 7  |
| MOR140-1  | 23 | 24 | 5  | 8  | 5 | 4 | 1 | 12 | -  | - | 7  |
| MOR134-1  | 22 | 18 | 1  | 7  | 1 | 0 | 0 | 12 | -  | - | 1  |

|           |    |    |    |   |   |   |   |    |   |   |    |
|-----------|----|----|----|---|---|---|---|----|---|---|----|
| MOR139-2  | 15 | 28 | 4  | 6 | 5 | 3 | 0 | 12 | - | - | 7  |
| MOR130-1  | 25 | 31 | 2  | 6 | 3 | 0 | 0 | 12 | - | - | 1  |
| MOR149-2  | 18 | 15 | 3  | 5 | 0 | 1 | 1 | 12 | - | - | 7  |
| MOR32-3   | 13 | 13 | 9  | 4 | 6 | 1 | 0 | -  | 1 | - | 52 |
| MOR32-9   | 14 | 6  | 15 | 4 | 5 | 0 | 0 | -  | 1 | - | 52 |
| MOR31-7   | 15 | 12 | 7  | 4 | 8 | 1 | 0 | -  | 1 | - | 52 |
| MOR31-11  | 18 | 8  | 8  | 4 | 5 | 1 | 0 | -  | 1 | - | 52 |
| MOR262-14 | 26 | 36 | 0  | 4 | 6 | 3 | 0 | -  | 1 | - | 13 |
| MOR262-5  | 26 | 36 | 0  | 4 | 6 | 2 | 0 | -  | 1 | - | 13 |
| MOR202-16 | 11 | 27 | 5  | 2 | 8 | 2 | 1 | -  | 2 | - | 5  |
| MOR202-37 | 18 | 33 | 6  | 4 | 8 | 3 | 3 | -  | 2 | - | 5  |
| MOR202-44 | 15 | 31 | 7  | 1 | 8 | 3 | 1 | -  | 2 | - | 5  |
| MOR202-18 | 14 | 35 | 7  | 4 | 8 | 2 | 2 | -  | 2 | - | 5  |
| MOR202-2  | 11 | 28 | 5  | 1 | 5 | 1 | 0 | -  | 2 | - | 5  |
| MOR202-33 | 16 | 31 | 4  | 2 | 6 | 0 | 0 | -  | 2 | - | 5  |
| MOR202-11 | 13 | 31 | 8  | 1 | 9 | 1 | 2 | -  | 2 | - | 5  |
| MOR202-10 | 16 | 28 | 7  | 4 | 8 | 3 | 2 | -  | 2 | - | 5  |
| MOR202-39 | 16 | 29 | 5  | 2 | 7 | 2 | 1 | -  | 2 | - | 5  |
| MOR202-34 | 15 | 30 | 3  | 2 | 7 | 0 | 0 | -  | 2 | - | 5  |
| MOR202-14 | 10 | 30 | 4  | 2 | 9 | 3 | 3 | -  | 2 | - | 5  |
| MOR202-8  | 17 | 23 | 4  | 2 | 7 | 1 | 0 | -  | 2 | - | 5  |
| MOR202-46 | 11 | 27 | 5  | 2 | 8 | 2 | 1 | -  | 2 | - | 5  |
| MOR202-17 | 10 | 32 | 4  | 1 | 9 | 2 | 2 | -  | 2 | - | 5  |
| MOR204-23 | 19 | 26 | 2  | 4 | 5 | 1 | 4 | -  | 2 | - | 5  |
| MOR202-1  | 20 | 20 | 5  | 2 | 7 | 0 | 1 | -  | 2 | - | 5  |
| MOR202-40 | 20 | 20 | 5  | 2 | 7 | 0 | 1 | -  | 2 | - | 5  |
| MOR202-35 | 19 | 33 | 7  | 1 | 6 | 0 | 1 | -  | 2 | - | 5  |
| MOR202-20 | 12 | 25 | 5  | 0 | 5 | 1 | 1 | -  | 2 | - | 5  |
| MOR213-5  | 17 | 22 | 6  | 1 | 6 | 0 | 0 | -  | 2 | - | 9  |
| MOR202-42 | 14 | 28 | 6  | 3 | 9 | 2 | 3 | -  | 2 | - | 5  |
| MOR202-45 | 18 | 33 | 6  | 4 | 8 | 3 | 3 | -  | 2 | - | 5  |
| MOR202-3  | 9  | 23 | 4  | 2 | 6 | 0 | 0 | -  | 2 | - | 5  |
| MOR202-13 | 15 | 23 | 3  | 1 | 7 | 3 | 2 | -  | 2 | - | 5  |
| MOR202-4  | 18 | 42 | 3  | 2 | 9 | 0 | 0 | -  | 2 | - | 5  |
| MOR204-17 | 19 | 26 | 3  | 4 | 5 | 3 | 3 | -  | 2 | - | 5  |
| MOR202-28 | 13 | 26 | 3  | 1 | 6 | 1 | 0 | -  | 2 | - | 5  |
| MOR213-2  | 15 | 19 | 9  | 1 | 5 | 0 | 0 | -  | 2 | - | 9  |
| MOR202-12 | 16 | 27 | 8  | 1 | 9 | 2 | 1 | -  | 2 | - | 5  |
| MOR34-7   | 11 | 6  | 6  | 4 | 5 | 0 | 1 | -  | 3 | - | 52 |
| MOR34-6   | 12 | 10 | 9  | 4 | 5 | 1 | 0 | -  | 3 | - | 52 |
| MOR176-1  | 15 | 43 | 5  | 3 | 6 | 0 | 0 | -  | 4 | - | 5  |
| MOR223-1  | 15 | 22 | 1  | 4 | 6 | 4 | 0 | -  | 4 | - | 10 |
| MOR223-3  | 17 | 22 | 1  | 4 | 6 | 5 | 0 | -  | 4 | - | 10 |
| MOR224-6  | 24 | 12 | 1  | 2 | 8 | 0 | 0 | -  | 4 | - | 10 |
| MOR224-3  | 25 | 12 | 2  | 2 | 7 | 1 | 0 | -  | 4 | - | 10 |
| MOR224-13 | 17 | 12 | 0  | 2 | 5 | 0 | 0 | -  | 4 | - | 10 |
| MOR224-8  | 24 | 12 | 1  | 2 | 6 | 0 | 0 | -  | 4 | - | 10 |
| MOR224-2  | 22 | 19 | 0  | 3 | 5 | 0 | 0 | -  | 4 | - | 10 |
| MOR177-8  | 16 | 28 | 8  | 3 | 5 | 2 | 1 | -  | 4 | - | 8  |
| MOR186-2  | 15 | 23 | 7  | 4 | 5 | 0 | 0 | -  | 4 | - | 8  |
| MOR190-1  | 20 | 29 | 5  | 3 | 5 | 0 | 0 | -  | 4 | - | 8  |
| MOR177-20 | 13 | 22 | 6  | 2 | 5 | 2 | 1 | -  | 4 | - | 8  |
| MOR208-1  | 18 | 28 | 6  | 3 | 8 | 1 | 1 | -  | 4 | - | 9  |
| MOR224-5  | 15 | 10 | 0  | 2 | 5 | 0 | 0 | -  | 4 | - | 10 |
| MOR176-2  | 15 | 46 | 5  | 3 | 6 | 0 | 0 | -  | 4 | - | 5  |
| MOR177-7  | 17 | 28 | 4  | 4 | 5 | 3 | 1 | -  | 4 | - | 8  |

|           |    |    |    |   |    |   |   |   |   |   |    |
|-----------|----|----|----|---|----|---|---|---|---|---|----|
| MOR208-2  | 15 | 21 | 6  | 2 | 7  | 1 | 1 | - | 4 | - | 9  |
| MOR208-5  | 17 | 28 | 6  | 1 | 6  | 0 | 1 | - | 4 | - | 9  |
| MOR177-3  | 12 | 19 | 4  | 2 | 5  | 2 | 1 | - | 4 | - | 8  |
| MOR177-14 | 14 | 30 | 8  | 1 | 5  | 2 | 1 | - | 4 | - | 8  |
| MOR177-12 | 11 | 22 | 9  | 3 | 5  | 1 | 0 | - | 4 | - | 8  |
| MOR14-2   | 15 | 11 | 5  | 3 | 6  | 0 | 0 | - | 5 | - | 51 |
| MOR14-7   | 20 | 6  | 6  | 3 | 6  | 0 | 1 | - | 5 | - | 51 |
| MOR14-1   | 14 | 12 | 6  | 4 | 10 | 0 | 1 | - | 5 | - | 51 |
| MOR14-6   | 15 | 7  | 7  | 3 | 6  | 0 | 1 | - | 5 | - | 51 |
| MOR14-4   | 18 | 7  | 6  | 3 | 5  | 0 | 1 | - | 5 | - | 51 |
| MOR23-1   | 17 | 9  | 15 | 2 | 6  | 0 | 0 | - | 5 | - | 52 |
| MOR8-1    | 10 | 11 | 7  | 3 | 6  | 0 | 0 | - | 5 | - | 51 |
| MOR7-2    | 13 | 10 | 5  | 3 | 5  | 0 | 0 | - | 5 | - | 51 |
| MOR4-1    | 17 | 3  | 7  | 4 | 5  | 0 | 0 | - | 5 | - | 51 |
| MOR9-1    | 9  | 8  | 9  | 4 | 6  | 0 | 0 | - | 5 | - | 51 |
| MOR8-3    | 11 | 9  | 8  | 4 | 5  | 0 | 0 | - | 5 | - | 51 |
| MOR2-1    | 11 | 1  | 3  | 3 | 7  | 0 | 0 | - | 5 | - | 51 |
| MOR182-5  | 15 | 17 | 6  | 2 | 7  | 5 | 1 | - | 6 | - | 5  |
| MOR183-9  | 15 | 21 | 9  | 1 | 5  | 5 | 1 | - | 6 | - | 5  |
| MOR183-5  | 16 | 21 | 5  | 1 | 5  | 1 | 0 | - | 6 | - | 5  |
| MOR182-8  | 14 | 21 | 6  | 2 | 5  | 3 | 2 | - | 6 | - | 5  |
| MOR182-13 | 15 | 17 | 6  | 2 | 7  | 5 | 1 | - | 6 | - | 5  |
| MOR182-14 | 12 | 21 | 4  | 1 | 6  | 2 | 1 | - | 6 | - | 5  |
| MOR267-13 | 21 | 18 | 4  | 1 | 5  | 2 | 1 | - | 6 | - | 10 |
| MOR184-3  | 16 | 16 | 2  | 0 | 7  | 0 | 0 | - | 6 | - | 5  |
| MOR183-2  | 14 | 20 | 7  | 0 | 6  | 0 | 0 | - | 6 | - | 5  |
| MOR184-1  | 18 | 16 | 2  | 1 | 6  | 0 | 0 | - | 6 | - | 5  |
| MOR182-12 | 13 | 21 | 6  | 2 | 7  | 5 | 1 | - | 6 | - | 5  |
| MOR182-1  | 18 | 17 | 7  | 2 | 6  | 2 | 1 | - | 6 | - | 5  |
| MOR183-8  | 17 | 22 | 3  | 1 | 7  | 2 | 0 | - | 6 | - | 5  |
| MOR182-10 | 8  | 21 | 6  | 2 | 5  | 3 | 2 | - | 6 | - | 5  |
| MOR106-13 | 17 | 22 | 5  | 2 | 5  | 2 | 5 | - | 6 | - | 11 |
| MOR184-7  | 19 | 16 | 1  | 1 | 6  | 0 | 0 | - | 6 | - | 5  |
| MOR184-5  | 18 | 14 | 3  | 1 | 5  | 0 | 0 | - | 6 | - | 5  |
| MOR183-4  | 15 | 19 | 5  | 1 | 6  | 0 | 0 | - | 6 | - | 5  |
| MOR106-11 | 18 | 24 | 3  | 0 | 6  | 0 | 0 | - | 6 | - | 11 |
| MOR253-7  | 21 | 18 | 1  | 3 | 10 | 1 | 5 | - | 7 | 1 | 13 |
| MOR253-6  | 20 | 18 | 1  | 3 | 11 | 1 | 5 | - | 7 | 1 | 13 |
| MOR253-10 | 19 | 14 | 2  | 2 | 9  | 2 | 5 | - | 7 | 1 | 13 |
| MOR253-8  | 22 | 17 | 1  | 3 | 9  | 0 | 7 | - | 7 | 1 | 13 |
| MOR253-3  | 21 | 15 | 1  | 3 | 10 | 2 | 7 | - | 7 | 1 | 13 |
| MOR253-1  | 20 | 16 | 1  | 3 | 10 | 2 | 5 | - | 7 | 1 | 13 |
| MOR4-2    | 14 | 5  | 7  | 4 | 5  | 0 | 0 | - | 7 | - | 51 |
| MOR253-2  | 19 | 14 | 0  | 3 | 8  | 2 | 2 | - | 7 | - | 13 |
| MOR253-5  | 20 | 16 | 2  | 3 | 11 | 2 | 3 | - | 7 | - | 13 |
| MOR262-8  | 25 | 30 | 1  | 3 | 5  | 1 | 0 | - | 7 | - | 13 |
| MOR253-9  | 23 | 20 | 0  | 3 | 5  | 1 | 0 | - | 7 | - | 13 |
| MOR253-4  | 20 | 15 | 1  | 3 | 10 | 1 | 3 | - | 7 | - | 13 |
| MOR252-2  | 17 | 9  | 2  | 1 | 5  | 0 | 0 | - | 7 | - | 13 |
| MOR113-2  | 19 | 24 | 1  | 4 | 5  | 3 | 0 | - | 8 | - | 6  |
| MOR114-6  | 16 | 17 | 3  | 3 | 9  | 1 | 0 | - | 8 | - | 6  |
| MOR114-2  | 17 | 17 | 3  | 3 | 9  | 1 | 0 | - | 8 | - | 6  |
| MOR114-13 | 13 | 12 | 5  | 4 | 8  | 0 | 0 | - | 8 | - | 6  |
| MOR103-6  | 14 | 13 | 1  | 0 | 6  | 0 | 0 | - | 9 | - | 6  |
| MOR103-8  | 15 | 20 | 7  | 1 | 6  | 0 | 0 | - | 9 | - | 6  |
| MOR103-7  | 13 | 23 | 5  | 0 | 6  | 0 | 0 | - | 9 | - | 6  |

|           |    |    |    |   |    |   |   |   |    |   |    |
|-----------|----|----|----|---|----|---|---|---|----|---|----|
| MOR103-9  | 13 | 19 | 6  | 0 | 6  | 0 | 0 | - | 9  | - | 6  |
| MOR247-4  | 16 | 19 | 7  | 4 | 5  | 0 | 0 | - | 10 | - | 4  |
| MOR245-6  | 17 | 11 | 7  | 2 | 5  | 1 | 0 | - | 10 | - | 4  |
| MOR248-7  | 15 | 15 | 6  | 2 | 5  | 1 | 1 | - | 10 | - | 4  |
| MOR245-5  | 15 | 9  | 4  | 4 | 5  | 0 | 0 | - | 10 | - | 4  |
| MOR245-21 | 18 | 13 | 6  | 4 | 6  | 0 | 0 | - | 10 | - | 4  |
| MOR245-3  | 19 | 14 | 7  | 4 | 5  | 0 | 0 | - | 10 | - | 4  |
| MOR247-2  | 16 | 19 | 7  | 4 | 5  | 0 | 0 | - | 10 | - | 4  |
| MOR248-4  | 23 | 16 | 6  | 0 | 5  | 1 | 1 | - | 10 | - | 4  |
| MOR274-2  | 16 | 17 | 0  | 3 | 6  | 0 | 0 | - | 10 | - | 2  |
| MOR248-10 | 18 | 18 | 5  | 1 | 5  | 1 | 1 | - | 10 | - | 4  |
| MOR248-3  | 19 | 14 | 7  | 4 | 5  | 1 | 1 | - | 10 | - | 4  |
| MOR245-4  | 23 | 16 | 4  | 4 | 7  | 0 | 0 | - | 10 | - | 4  |
| MOR245-12 | 13 | 13 | 2  | 2 | 5  | 0 | 0 | - | 10 | - | 4  |
| MOR136-2  | 25 | 20 | 1  | 0 | 7  | 1 | 6 | - | 11 | 3 | 1  |
| MOR136-4  | 26 | 24 | 1  | 3 | 7  | 1 | 6 | - | 11 | 3 | 1  |
| MOR136-3  | 25 | 25 | 1  | 4 | 6  | 0 | 5 | - | 11 | 3 | 1  |
| MOR136-11 | 24 | 27 | 1  | 2 | 5  | 0 | 5 | - | 11 | 3 | 1  |
| MOR135-13 | 21 | 28 | 3  | 2 | 5  | 3 | 2 | - | 11 | - | 1  |
| MOR13-2   | 15 | 6  | 1  | 4 | 6  | 1 | 0 | - | 11 | - | 51 |
| MOR136-6  | 26 | 29 | 1  | 0 | 7  | 1 | 3 | - | 11 | - | 1  |
| MOR136-12 | 22 | 26 | 2  | 4 | 5  | 0 | 4 | - | 11 | - | 1  |
| MOR136-1  | 27 | 24 | 1  | 2 | 6  | 1 | 4 | - | 11 | - | 1  |
| MOR136-10 | 26 | 27 | 0  | 1 | 8  | 1 | 1 | - | 11 | - | 1  |
| MOR136-9  | 25 | 23 | 1  | 1 | 8  | 1 | 4 | - | 11 | - | 1  |
| MOR136-8  | 25 | 24 | 0  | 2 | 8  | 0 | 0 | - | 11 | - | 1  |
| MOR136-5  | 26 | 21 | 0  | 1 | 8  | 0 | 4 | - | 11 | - | 1  |
| MOR171-46 | 14 | 25 | 6  | 3 | 5  | 0 | 0 | - | 12 | - | 8  |
| MOR171-24 | 19 | 30 | 12 | 4 | 11 | 2 | 0 | - | 12 | - | 8  |
| MOR167-1  | 19 | 25 | 4  | 1 | 11 | 1 | 1 | - | 12 | - | 8  |
| MOR171-23 | 20 | 31 | 7  | 4 | 11 | 1 | 0 | - | 12 | - | 8  |
| MOR171-19 | 16 | 19 | 5  | 1 | 7  | 1 | 2 | - | 12 | - | 8  |
| MOR162-13 | 13 | 29 | 1  | 0 | 6  | 2 | 2 | - | 12 | - | 8  |
| MOR162-4  | 14 | 29 | 3  | 1 | 11 | 3 | 1 | - | 12 | - | 8  |
| MOR107-1  | 16 | 28 | 0  | 1 | 6  | 2 | 0 | - | 12 | - | 11 |
| MOR171-4  | 17 | 32 | 5  | 3 | 6  | 0 | 0 | - | 12 | - | 8  |
| MOR171-1  | 18 | 31 | 6  | 3 | 7  | 2 | 0 | - | 12 | - | 8  |
| MOR171-12 | 23 | 23 | 6  | 2 | 9  | 0 | 0 | - | 12 | - | 8  |
| MOR164-3  | 16 | 28 | 5  | 1 | 9  | 1 | 0 | - | 12 | - | 8  |
| MOR164-2  | 18 | 26 | 3  | 1 | 10 | 1 | 0 | - | 12 | - | 8  |
| MOR171-28 | 17 | 33 | 5  | 3 | 7  | 2 | 0 | - | 12 | - | 8  |
| MOR167-2  | 16 | 34 | 3  | 1 | 16 | 0 | 0 | - | 12 | - | 8  |
| MOR164-1  | 18 | 28 | 5  | 0 | 12 | 0 | 0 | - | 12 | - | 8  |
| MOR171-22 | 15 | 25 | 6  | 2 | 5  | 0 | 0 | - | 12 | - | 8  |
| MOR165-5  | 16 | 24 | 2  | 1 | 6  | 1 | 2 | - | 12 | - | 8  |
| MOR170-5  | 15 | 26 | 1  | 3 | 5  | 1 | 1 | - | 12 | - | 8  |
| MOR170-6  | 21 | 22 | 2  | 3 | 6  | 1 | 0 | - | 12 | - | 8  |
| MOR165-4  | 20 | 34 | 6  | 2 | 9  | 0 | 2 | - | 12 | - | 8  |
| MOR170-4  | 18 | 22 | 0  | 2 | 8  | 1 | 1 | - | 12 | - | 8  |
| MOR171-20 | 19 | 29 | 6  | 3 | 7  | 2 | 3 | - | 12 | - | 8  |
| MOR168-1  | 12 | 32 | 2  | 3 | 6  | 0 | 0 | - | 12 | - | 8  |
| MOR171-50 | 15 | 21 | 7  | 2 | 7  | 2 | 1 | - | 12 | - | 8  |
| MOR171-25 | 17 | 20 | 7  | 3 | 9  | 1 | 1 | - | 12 | - | 8  |
| MOR171-21 | 12 | 20 | 7  | 1 | 6  | 2 | 1 | - | 12 | - | 8  |
| MOR171-41 | 16 | 25 | 6  | 2 | 6  | 1 | 3 | - | 12 | - | 8  |
| MOR171-5  | 19 | 27 | 11 | 4 | 13 | 2 | 3 | - | 12 | - | 8  |



|           |    |    |    |   |    |   |   |   |    |   |    |
|-----------|----|----|----|---|----|---|---|---|----|---|----|
| MOR171-2  | 21 | 36 | 4  | 2 | 6  | 0 | 0 | - | 12 | - | 8  |
| MOR171-44 | 19 | 25 | 7  | 2 | 7  | 1 | 2 | - | 12 | - | 8  |
| MOR165-10 | 16 | 29 | 4  | 1 | 10 | 0 | 2 | - | 12 | - | 8  |
| MOR161-3  | 15 | 34 | 2  | 1 | 7  | 1 | 0 | - | 12 | - | 8  |
| MOR165-8  | 20 | 29 | 5  | 1 | 8  | 1 | 1 | - | 12 | - | 8  |
| MOR165-1  | 16 | 34 | 3  | 3 | 10 | 1 | 3 | - | 12 | - | 8  |
| MOR167-3  | 17 | 35 | 3  | 1 | 16 | 0 | 0 | - | 12 | - | 8  |
| MOR171-9  | 15 | 22 | 6  | 3 | 5  | 0 | 0 | - | 12 | - | 8  |
| MOR161-4  | 22 | 28 | 7  | 3 | 9  | 1 | 1 | - | 12 | - | 8  |
| MOR161-1  | 21 | 26 | 9  | 4 | 12 | 1 | 0 | - | 12 | - | 8  |
| MOR162-7  | 14 | 27 | 3  | 2 | 5  | 2 | 3 | - | 12 | - | 8  |
| MOR165-7  | 20 | 32 | 3  | 1 | 10 | 1 | 2 | - | 12 | - | 8  |
| MOR161-6  | 22 | 30 | 9  | 1 | 16 | 1 | 1 | - | 12 | - | 8  |
| MOR170-13 | 19 | 20 | 2  | 2 | 6  | 1 | 0 | - | 12 | - | 8  |
| MOR171-18 | 20 | 28 | 7  | 4 | 10 | 1 | 0 | - | 12 | - | 8  |
| MOR171-51 | 19 | 27 | 7  | 3 | 7  | 1 | 2 | - | 12 | - | 8  |
| MOR179-3  | 14 | 26 | 6  | 2 | 5  | 0 | 1 | - | 12 | - | 5  |
| MOR168-2  | 12 | 28 | 3  | 1 | 5  | 0 | 0 | - | 12 | - | 8  |
| MOR162-6  | 14 | 24 | 3  | 1 | 11 | 3 | 4 | - | 12 | - | 8  |
| MOR163-1  | 19 | 33 | 4  | 1 | 9  | 1 | 0 | - | 12 | - | 8  |
| MOR169-1  | 14 | 28 | 2  | 1 | 6  | 0 | 0 | - | 12 | - | 8  |
| MOR162-5  | 16 | 35 | 3  | 2 | 8  | 1 | 2 | - | 12 | - | 8  |
| MOR161-2  | 22 | 25 | 4  | 3 | 13 | 0 | 1 | - | 12 | - | 8  |
| MOR283-3  | 18 | 11 | 1  | 3 | 5  | 6 | 3 | - | 12 | - | 2  |
| MOR260-6  | 21 | 25 | 4  | 4 | 5  | 3 | 0 | - | 12 | - | 2  |
| MOR170-1  | 18 | 22 | 0  | 2 | 7  | 0 | 1 | - | 12 | - | 8  |
| MOR170-10 | 15 | 17 | 1  | 1 | 5  | 1 | 1 | - | 12 | - | 8  |
| MOR161-5  | 16 | 30 | 5  | 3 | 13 | 1 | 0 | - | 12 | - | 8  |
| MOR202-5  | 14 | 40 | 4  | 3 | 5  | 1 | 0 | - | 12 | - | 5  |
| MOR283-2  | 18 | 10 | 2  | 3 | 5  | 3 | 3 | - | 12 | - | 2  |
| MOR170-11 | 17 | 20 | 0  | 0 | 5  | 2 | 0 | - | 12 | - | 8  |
| MOR261-12 | 20 | 11 | 5  | 3 | 6  | 0 | 0 | - | 12 | - | 2  |
| MOR283-6  | 18 | 8  | 0  | 3 | 6  | 6 | 4 | - | 12 | - | 2  |
| MOR283-9  | 19 | 10 | 1  | 4 | 5  | 6 | 4 | - | 12 | - | 2  |
| MOR256-18 | 13 | 21 | 3  | 4 | 5  | 0 | 1 | - | 12 | - | 2  |
| MOR225-14 | 15 | 17 | 3  | 3 | 6  | 2 | 2 | - | 12 | - | 4  |
| MOR162-8  | 18 | 29 | 4  | 1 | 5  | 3 | 0 | - | 12 | - | 8  |
| MOR162-2  | 13 | 31 | 3  | 0 | 10 | 2 | 4 | - | 12 | - | 8  |
| MOR162-12 | 14 | 26 | 2  | 2 | 6  | 2 | 2 | - | 12 | - | 8  |
| MOR225-12 | 13 | 16 | 3  | 2 | 5  | 1 | 2 | - | 12 | - | 4  |
| MOR225-5  | 15 | 17 | 3  | 3 | 6  | 2 | 2 | - | 12 | - | 4  |
| MOR225-15 | 15 | 16 | 3  | 3 | 6  | 2 | 2 | - | 12 | - | 4  |
| MOR204-22 | 16 | 24 | 3  | 4 | 2  | 4 | 6 | - | -  | 2 | 5  |
| MOR204-36 | 14 | 22 | 3  | 2 | 2  | 1 | 6 | - | -  | 2 | 5  |
| MOR204-34 | 21 | 22 | 2  | 3 | 3  | 1 | 6 | - | -  | 2 | 5  |
| MOR204-14 | 19 | 28 | 2  | 3 | 2  | 1 | 6 | - | -  | 2 | 5  |
| MOR25-2   | 11 | 8  | 10 | 2 | 2  | 0 | 0 | - | -  | - | 52 |
| MOR28-1   | 15 | 11 | 7  | 4 | 1  | 0 | 0 | - | -  | - | 52 |
| MOR32-2   | 16 | 10 | 17 | 4 | 4  | 0 | 0 | - | -  | - | 52 |
| MOR39-1   | 12 | 3  | 1  | 4 | 0  | 0 | 0 | - | -  | - | 52 |
| MOR12-4   | 8  | 12 | 8  | 2 | 3  | 0 | 0 | - | -  | - | 51 |
| MOR30-3   | 7  | 9  | 9  | 2 | 1  | 0 | 0 | - | -  | - | 52 |
| MOR29-1   | 14 | 10 | 4  | 3 | 1  | 0 | 0 | - | -  | - | 52 |
| MOR19-1   | 13 | 8  | 3  | 4 | 3  | 0 | 0 | - | -  | - | 51 |
| MOR33-2   | 19 | 14 | 15 | 2 | 1  | 1 | 0 | - | -  | - | 52 |
| MOR15-3   | 10 | 7  | 5  | 4 | 3  | 1 | 0 | - | -  | - | 51 |

|           |    |    |    |   |   |   |   |   |   |   |    |
|-----------|----|----|----|---|---|---|---|---|---|---|----|
| MOR20-1   | 8  | 7  | 5  | 2 | 2 | 0 | 1 | - | - | - | 51 |
| MOR31-10  | 13 | 12 | 13 | 3 | 2 | 0 | 1 | - | - | - | 52 |
| MOR19-2   | 6  | 4  | 3  | 3 | 0 | 0 | 0 | - | - | - | 51 |
| MOR262-12 | 28 | 36 | 1  | 4 | 4 | 2 | 0 | - | - | - | 13 |
| MOR262-6  | 26 | 35 | 0  | 4 | 3 | 2 | 0 | - | - | - | 13 |
| MOR11-2   | 10 | 5  | 5  | 4 | 3 | 0 | 0 | - | - | - | 51 |
| MOR13-4   | 13 | 7  | 11 | 3 | 3 | 0 | 0 | - | - | - | 51 |
| MOR13-1   | 15 | 6  | 4  | 4 | 3 | 1 | 0 | - | - | - | 51 |
| MOR31-9   | 13 | 9  | 10 | 4 | 3 | 1 | 1 | - | - | - | 52 |
| MOR258-6  | 19 | 27 | 1  | 1 | 4 | 0 | 0 | - | - | - | 13 |
| MOR258-1  | 17 | 24 | 1  | 2 | 3 | 1 | 1 | - | - | - | 13 |
| MOR38-1   | 7  | 8  | 3  | 1 | 2 | 0 | 0 | - | - | - | 52 |
| MOR26-2   | 11 | 8  | 9  | 4 | 0 | 2 | 0 | - | - | - | 52 |
| MOR18-3   | 11 | 5  | 11 | 3 | 1 | 1 | 0 | - | - | - | 51 |
| MOR16-1   | 12 | 5  | 4  | 1 | 2 | 0 | 0 | - | - | - | 51 |
| MOR135-28 | 19 | 31 | 6  | 4 | 3 | 3 | 0 | - | - | - | 1  |
| MOR42-1   | 11 | 3  | 0  | 1 | 0 | 0 | 0 | - | - | - | 55 |
| MOR42-3   | 11 | 4  | 0  | 1 | 0 | 0 | 0 | - | - | - | 55 |
| MOR11-1   | 10 | 6  | 5  | 4 | 4 | 0 | 0 | - | - | - | 51 |
| MOR15-4   | 11 | 7  | 4  | 4 | 3 | 1 | 0 | - | - | - | 51 |
| MOR35-1   | 7  | 8  | 7  | 4 | 3 | 0 | 0 | - | - | - | 52 |
| MOR12-1   | 12 | 7  | 9  | 4 | 2 | 0 | 0 | - | - | - | 51 |
| MOR187-2  | 14 | 22 | 4  | 3 | 4 | 0 | 2 | - | - | - | 8  |
| MOR150-1  | 21 | 27 | 3  | 2 | 0 | 6 | 0 | - | - | - | 7  |
| MOR266-3  | 12 | 15 | 2  | 2 | 2 | 0 | 0 | - | - | - | 10 |
| MOR127-1  | 19 | 26 | 1  | 4 | 3 | 1 | 0 | - | - | - | 1  |
| MOR14-11  | 14 | 13 | 6  | 2 | 4 | 1 | 0 | - | - | - | 51 |
| MOR264-6  | 20 | 30 | 4  | 4 | 4 | 0 | 1 | - | - | - | 10 |
| MOR217-1  | 14 | 34 | 3  | 1 | 2 | 0 | 0 | - | - | - | 13 |
| MOR218-1  | 16 | 11 | 3  | 3 | 0 | 0 | 2 | - | - | - | 5  |
| MOR103-4  | 17 | 32 | 3  | 0 | 1 | 0 | 0 | - | - | - | 6  |
| MOR103-2  | 15 | 28 | 3  | 0 | 2 | 0 | 0 | - | - | - | 6  |
| MOR267-8  | 17 | 21 | 4  | 0 | 2 | 1 | 0 | - | - | - | 10 |
| MOR186-1  | 16 | 25 | 2  | 4 | 5 | 0 | 0 | - | - | - | 8  |
| MOR243-1  | 20 | 32 | 6  | 1 | 0 | 0 | 0 | - | - | - | 4  |
| MOR174-9  | 16 | 33 | 6  | 3 | 2 | 0 | 1 | - | - | - | 5  |
| MOR105-7  | 18 | 13 | 0  | 1 | 0 | 0 | 0 | - | - | - | 6  |
| MOR101-1  | 17 | 16 | 1  | 0 | 2 | 0 | 0 | - | - | - | 2  |
| MOR233-2  | 23 | 28 | 8  | 3 | 3 | 2 | 3 | - | - | - | 4  |
| MOR213-3  | 14 | 26 | 8  | 2 | 0 | 0 | 0 | - | - | - | 9  |
| MOR40-12  | 8  | 4  | 2  | 4 | 1 | 1 | 0 | - | - | - | 56 |
| MOR10-4   | 13 | 7  | 7  | 4 | 2 | 0 | 0 | - | - | - | 51 |
| MOR21-1   | 11 | 2  | 3  | 0 | 1 | 0 | 0 | - | - | - | 51 |
| MOR223-2  | 12 | 19 | 1  | 4 | 4 | 4 | 0 | - | - | - | 10 |
| MOR223-6  | 19 | 25 | 3  | 2 | 3 | 0 | 0 | - | - | - | 10 |
| MOR104-2  | 10 | 30 | 1  | 1 | 2 | 0 | 0 | - | - | - | 11 |
| MOR260-2  | 25 | 25 | 1  | 4 | 3 | 4 | 0 | - | - | - | 2  |
| MOR244-3  | 18 | 28 | 8  | 3 | 0 | 0 | 0 | - | - | - | 4  |
| MOR246-2  | 18 | 22 | 4  | 2 | 2 | 1 | 0 | - | - | - | 4  |
| MOR165-6  | 20 | 32 | 3  | 2 | 4 | 1 | 4 | - | - | - | 8  |
| MOR171-49 | 10 | 26 | 5  | 2 | 4 | 0 | 1 | - | - | - | 8  |
| MOR171-53 | 18 | 21 | 5  | 2 | 4 | 0 | 1 | - | - | - | 8  |
| MOR223-4  | 18 | 20 | 3  | 2 | 3 | 1 | 0 | - | - | - | 10 |
| MOR222-1  | 12 | 17 | 0  | 0 | 2 | 0 | 1 | - | - | - | 9  |
| MOR224-9  | 19 | 21 | 0  | 1 | 4 | 0 | 1 | - | - | - | 10 |
| MOR268-1  | 16 | 23 | 1  | 4 | 2 | 1 | 1 | - | - | - | 10 |

|           |    |    |    |   |   |   |   |   |   |   |    |
|-----------|----|----|----|---|---|---|---|---|---|---|----|
| MOR227-1  | 23 | 23 | 6  | 1 | 1 | 0 | 0 | - | - | - | 4  |
| MOR223-9  | 18 | 26 | 3  | 2 | 2 | 0 | 0 | - | - | - | 10 |
| MOR264-5  | 22 | 27 | 4  | 2 | 2 | 0 | 2 | - | - | - | 10 |
| MOR218-3  | 12 | 11 | 3  | 1 | 1 | 0 | 1 | - | - | - | 5  |
| MOR256-4  | 16 | 26 | 3  | 4 | 3 | 0 | 0 | - | - | - | 2  |
| MOR266-4  | 19 | 12 | 3  | 2 | 3 | 0 | 0 | - | - | - | 10 |
| MOR224-10 | 19 | 19 | 2  | 4 | 4 | 0 | 0 | - | - | - | 10 |
| MOR264-19 | 26 | 21 | 4  | 1 | 3 | 0 | 1 | - | - | - | 10 |
| MOR267-17 | 16 | 24 | 2  | 4 | 3 | 0 | 0 | - | - | - | 10 |
| MOR175-2  | 25 | 26 | 6  | 2 | 1 | 0 | 0 | - | - | - | 5  |
| MOR261-10 | 25 | 26 | 4  | 3 | 1 | 2 | 0 | - | - | - | 2  |
| MOR202-7  | 12 | 39 | 3  | 3 | 4 | 1 | 0 | - | - | - | 5  |
| MOR264-26 | 18 | 27 | 3  | 0 | 2 | 1 | 0 | - | - | - | 11 |
| MOR172-7  | 13 | 26 | 0  | 1 | 1 | 0 | 0 | - | - | - | 5  |
| MOR152-1  | 15 | 19 | 1  | 4 | 2 | 4 | 0 | - | - | - | 7  |
| MOR252-3  | 17 | 10 | 2  | 0 | 3 | 0 | 0 | - | - | - | 13 |
| MOR223-5  | 18 | 16 | 2  | 2 | 3 | 0 | 0 | - | - | - | 10 |
| MOR258-3  | 20 | 21 | 3  | 2 | 2 | 0 | 0 | - | - | - | 13 |
| MOR258-2  | 19 | 28 | 4  | 2 | 2 | 1 | 0 | - | - | - | 13 |
| MOR172-1  | 21 | 40 | 8  | 0 | 1 | 0 | 0 | - | - | - | 5  |
| MOR233-14 | 22 | 20 | 7  | 4 | 3 | 1 | 0 | - | - | - | 4  |
| MOR233-10 | 23 | 24 | 5  | 4 | 3 | 2 | 2 | - | - | - | 4  |
| MOR233-20 | 23 | 19 | 7  | 4 | 2 | 1 | 1 | - | - | - | 4  |
| MOR228-5  | 19 | 20 | 5  | 4 | 1 | 1 | 0 | - | - | - | 4  |
| MOR228-4  | 19 | 21 | 5  | 4 | 1 | 1 | 0 | - | - | - | 4  |
| MOR248-2  | 18 | 14 | 3  | 1 | 3 | 1 | 2 | - | - | - | 4  |
| MOR248-18 | 20 | 19 | 2  | 3 | 1 | 1 | 2 | - | - | - | 4  |
| MOR246-4  | 21 | 22 | 4  | 2 | 3 | 1 | 0 | - | - | - | 4  |
| MOR267-15 | 14 | 13 | 2  | 4 | 0 | 0 | 0 | - | - | - | 10 |
| MOR267-3  | 22 | 20 | 3  | 2 | 3 | 0 | 0 | - | - | - | 10 |
| MOR233-13 | 26 | 21 | 9  | 4 | 1 | 2 | 2 | - | - | - | 4  |
| MOR146-1  | 19 | 18 | 2  | 1 | 0 | 2 | 3 | - | - | - | 7  |
| MOR102-2  | 16 | 14 | 1  | 1 | 1 | 0 | 0 | - | - | - | 13 |
| MOR170-9  | 9  | 17 | 1  | 1 | 4 | 1 | 0 | - | - | - | 8  |
| MOR204-15 | 20 | 27 | 3  | 4 | 2 | 1 | 3 | - | - | - | 5  |
| MOR202-43 | 16 | 19 | 3  | 1 | 1 | 0 | 0 | - | - | - | 5  |
| MOR202-32 | 16 | 19 | 3  | 1 | 1 | 0 | 0 | - | - | - | 5  |
| MOR248-11 | 17 | 15 | 5  | 4 | 3 | 0 | 1 | - | - | - | 4  |
| MOR184-6  | 17 | 16 | 2  | 1 | 4 | 0 | 0 | - | - | - | 5  |
| MOR160-4  | 18 | 19 | 1  | 0 | 0 | 0 | 0 | - | - | - | 8  |
| MOR206-6  | 18 | 23 | 4  | 1 | 0 | 0 | 0 | - | - | - | 8  |
| MOR174-1  | 20 | 33 | 3  | 3 | 0 | 0 | 0 | - | - | - | 5  |
| MOR185-7  | 20 | 19 | 1  | 3 | 1 | 0 | 1 | - | - | - | 8  |
| MOR190-2  | 21 | 22 | 4  | 4 | 3 | 0 | 0 | - | - | - | 8  |
| MOR194-1  | 24 | 29 | 4  | 4 | 3 | 1 | 0 | - | - | - | 8  |
| MOR185-1  | 17 | 31 | 8  | 3 | 4 | 0 | 1 | - | - | - | 8  |
| MOR182-2  | 13 | 23 | 4  | 3 | 4 | 2 | 1 | - | - | - | 5  |
| MOR146-9  | 15 | 21 | 1  | 2 | 1 | 2 | 3 | - | - | - | 7  |
| MOR257-5  | 25 | 24 | 3  | 1 | 2 | 1 | 0 | - | - | - | 2  |
| MOR196-1  | 20 | 25 | 2  | 2 | 0 | 0 | 0 | - | - | - | 5  |
| MOR215-1  | 20 | 36 | 5  | 2 | 1 | 0 | 0 | - | - | - | 5  |
| MOR195-1  | 15 | 32 | 5  | 3 | 0 | 0 | 0 | - | - | - | 5  |
| MOR196-4  | 25 | 33 | 4  | 2 | 0 | 0 | 0 | - | - | - | 5  |
| MOR175-3  | 21 | 28 | 10 | 3 | 0 | 1 | 0 | - | - | - | 5  |
| MOR215-3  | 19 | 29 | 7  | 2 | 1 | 0 | 0 | - | - | - | 5  |
| MOR174-11 | 15 | 25 | 3  | 1 | 2 | 0 | 0 | - | - | - | 5  |

|           |    |    |   |   |   |   |   |   |   |   |    |
|-----------|----|----|---|---|---|---|---|---|---|---|----|
| MOR210-2  | 20 | 28 | 6 | 0 | 1 | 0 | 0 | - | - | - | 9  |
| MOR215-2  | 16 | 26 | 7 | 1 | 0 | 0 | 0 | - | - | - | 5  |
| MOR259-9  | 15 | 21 | 3 | 1 | 3 | 1 | 1 | - | - | - | 10 |
| MOR259-12 | 17 | 25 | 3 | 0 | 4 | 2 | 0 | - | - | - | 10 |
| MOR203-1  | 20 | 26 | 4 | 2 | 1 | 0 | 0 | - | - | - | 5  |
| MOR184-4  | 16 | 16 | 3 | 0 | 4 | 0 | 0 | - | - | - | 5  |
| MOR259-11 | 19 | 19 | 3 | 2 | 4 | 2 | 0 | - | - | - | 10 |
| MOR178-1  | 19 | 28 | 6 | 2 | 2 | 0 | 0 | - | - | - | 5  |
| MOR214-5  | 17 | 30 | 6 | 2 | 1 | 0 | 1 | - | - | - | 5  |
| MOR136-14 | 26 | 27 | 0 | 4 | 3 | 1 | 0 | - | - | - | 1  |
| MOR135-1  | 21 | 31 | 3 | 4 | 2 | 2 | 1 | - | - | - | 1  |
| MOR206-2  | 18 | 24 | 4 | 1 | 1 | 0 | 1 | - | - | - | 8  |
| MOR188-4  | 16 | 28 | 3 | 4 | 3 | 0 | 0 | - | - | - | 8  |
| MOR206-3  | 20 | 29 | 3 | 1 | 1 | 0 | 0 | - | - | - | 8  |
| MOR135-6  | 22 | 35 | 2 | 3 | 3 | 3 | 1 | - | - | - | 1  |
| MOR255-4  | 22 | 21 | 1 | 1 | 3 | 1 | 1 | - | - | - | 3  |
| MOR173-2  | 20 | 30 | 8 | 2 | 1 | 0 | 1 | - | - | - | 9  |
| MOR181-2  | 11 | 25 | 4 | 1 | 1 | 3 | 0 | - | - | - | 5  |
| MOR172-5  | 21 | 36 | 2 | 1 | 1 | 0 | 2 | - | - | - | 5  |
| MOR213-6  | 13 | 21 | 6 | 0 | 6 | 0 | 0 | - | - | - | 9  |
| MOR203-2  | 22 | 23 | 2 | 1 | 2 | 1 | 0 | - | - | - | 5  |
| MOR267-4  | 19 | 18 | 2 | 0 | 2 | 0 | 0 | - | - | - | 10 |
| MOR248-15 | 19 | 13 | 2 | 1 | 4 | 1 | 1 | - | - | - | 4  |
| MOR177-9  | 15 | 30 | 5 | 1 | 3 | 1 | 0 | - | - | - | 8  |
| MOR176-3  | 15 | 31 | 3 | 2 | 3 | 0 | 0 | - | - | - | 5  |
| MOR214-2  | 13 | 32 | 7 | 1 | 2 | 0 | 1 | - | - | - | 5  |
| MOR204-5  | 16 | 32 | 2 | 3 | 3 | 0 | 1 | - | - | - | 5  |
| MOR271-1  | 17 | 17 | 3 | 1 | 1 | 2 | 0 | - | - | - | 2  |
| MOR204-3  | 23 | 31 | 4 | 4 | 1 | 0 | 1 | - | - | - | 5  |
| MOR204-1  | 15 | 17 | 2 | 2 | 0 | 0 | 1 | - | - | - | 5  |
| MOR204-4  | 19 | 30 | 4 | 4 | 3 | 0 | 1 | - | - | - | 5  |
| MOR214-3  | 17 | 26 | 5 | 2 | 2 | 0 | 1 | - | - | - | 5  |
| MOR227-5  | 23 | 23 | 5 | 1 | 0 | 0 | 0 | - | - | - | 4  |
| MOR236-1  | 20 | 19 | 5 | 4 | 2 | 1 | 0 | - | - | - | 4  |
| MOR145-1  | 24 | 25 | 3 | 3 | 4 | 2 | 1 | - | - | - | 7  |
| MOR147-3  | 22 | 20 | 0 | 3 | 2 | 2 | 0 | - | - | - | 7  |
| MOR152-4  | 22 | 23 | 2 | 2 | 1 | 2 | 0 | - | - | - | 7  |
| MOR262-7  | 17 | 24 | 1 | 2 | 3 | 1 | 1 | - | - | - | 13 |
| MOR147-1  | 22 | 19 | 2 | 4 | 0 | 2 | 0 | - | - | - | 7  |
| MOR151-1  | 26 | 24 | 3 | 3 | 0 | 0 | 1 | - | - | - | 7  |
| MOR143-1  | 15 | 21 | 1 | 2 | 2 | 2 | 0 | - | - | - | 7  |
| MOR262-2  | 22 | 26 | 1 | 1 | 4 | 0 | 0 | - | - | - | 13 |
| MOR106-12 | 16 | 23 | 3 | 1 | 4 | 1 | 0 | - | - | - | 11 |
| MOR138-6  | 24 | 31 | 4 | 1 | 3 | 0 | 0 | - | - | - | 1  |
| MOR154-1  | 24 | 29 | 3 | 2 | 2 | 4 | 0 | - | - | - | 7  |
| MOR174-6  | 16 | 19 | 3 | 0 | 2 | 0 | 0 | - | - | - | 5  |
| MOR172-2  | 17 | 33 | 4 | 1 | 2 | 0 | 2 | - | - | - | 5  |
| MOR248-9  | 16 | 14 | 5 | 2 | 4 | 0 | 1 | - | - | - | 4  |
| MOR279-2  | 21 | 11 | 3 | 2 | 3 | 1 | 0 | - | - | - | 2  |
| MOR281-1  | 20 | 22 | 3 | 2 | 2 | 0 | 0 | - | - | - | 2  |
| MOR224-12 | 17 | 13 | 0 | 2 | 4 | 0 | 0 | - | - | - | 10 |
| MOR175-5  | 18 | 25 | 4 | 1 | 0 | 0 | 0 | - | - | - | 5  |
| MOR201-2  | 20 | 37 | 7 | 4 | 1 | 0 | 0 | - | - | - | 5  |
| MOR175-4  | 23 | 26 | 2 | 0 | 2 | 0 | 0 | - | - | - | 5  |
| MOR209-1  | 16 | 32 | 4 | 1 | 1 | 1 | 1 | - | - | - | 9  |
| MOR133-6  | 19 | 22 | 2 | 4 | 2 | 0 | 0 | - | - | - | 1  |

|           |    |    |    |   |   |   |   |   |   |   |    |
|-----------|----|----|----|---|---|---|---|---|---|---|----|
| MOR129-2  | 21 | 32 | 3  | 2 | 3 | 0 | 0 | - | - | - | 1  |
| MOR105-5  | 22 | 15 | 0  | 1 | 2 | 1 | 0 | - | - | - | 6  |
| MOR135-8  | 17 | 31 | 3  | 4 | 2 | 3 | 2 | - | - | - | 1  |
| MOR267-19 | 18 | 20 | 5  | 1 | 2 | 0 | 0 | - | - | - | 10 |
| MOR104-1  | 21 | 20 | 0  | 0 | 2 | 1 | 0 | - | - | - | 6  |
| MOR225-11 | 22 | 13 | 8  | 3 | 2 | 1 | 0 | - | - | - | 4  |
| MOR223-8  | 13 | 24 | 4  | 1 | 3 | 0 | 0 | - | - | - | 10 |
| MOR174-3  | 19 | 32 | 4  | 2 | 3 | 0 | 0 | - | - | - | 5  |
| MOR177-10 | 8  | 11 | 4  | 1 | 2 | 1 | 0 | - | - | - | 8  |
| MOR121-1  | 22 | 17 | 2  | 0 | 1 | 0 | 0 | - | - | - | 11 |
| MOR160-2  | 19 | 24 | 4  | 2 | 0 | 1 | 1 | - | - | - | 8  |
| MOR255-6  | 19 | 20 | 1  | 1 | 3 | 1 | 1 | - | - | - | 3  |
| MOR262-10 | 18 | 22 | 2  | 3 | 1 | 0 | 0 | - | - | - | 13 |
| MOR138-2  | 28 | 29 | 3  | 3 | 1 | 0 | 1 | - | - | - | 1  |
| MOR160-1  | 23 | 21 | 3  | 1 | 0 | 3 | 0 | - | - | - | 8  |
| MOR260-10 | 25 | 28 | 1  | 3 | 3 | 2 | 0 | - | - | - | 2  |
| MOR177-1  | 19 | 28 | 6  | 4 | 4 | 3 | 1 | - | - | - | 8  |
| MOR177-6  | 18 | 29 | 5  | 1 | 4 | 0 | 0 | - | - | - | 8  |
| MOR208-3  | 15 | 24 | 7  | 2 | 4 | 1 | 1 | - | - | - | 9  |
| MOR260-4  | 21 | 25 | 1  | 4 | 3 | 0 | 0 | - | - | - | 2  |
| MOR260-3  | 24 | 21 | 1  | 2 | 2 | 0 | 0 | - | - | - | 2  |
| MOR174-16 | 16 | 21 | 3  | 0 | 2 | 1 | 0 | - | - | - | 5  |
| MOR211-2  | 21 | 28 | 4  | 1 | 3 | 0 | 2 | - | - | - | 9  |
| MOR174-13 | 16 | 20 | 3  | 1 | 3 | 0 | 0 | - | - | - | 5  |
| MOR174-2  | 19 | 32 | 2  | 3 | 3 | 0 | 1 | - | - | - | 5  |
| MOR212-1  | 18 | 26 | 1  | 2 | 1 | 0 | 0 | - | - | - | 9  |
| MOR212-5  | 18 | 24 | 2  | 2 | 1 | 0 | 0 | - | - | - | 9  |
| MOR216-1  | 15 | 22 | 0  | 1 | 1 | 0 | 0 | - | - | - | 5  |
| MOR260-7  | 24 | 21 | 6  | 3 | 4 | 3 | 0 | - | - | - | 2  |
| MOR192-1  | 19 | 32 | 4  | 3 | 3 | 0 | 0 | - | - | - | 8  |
| MOR179-5  | 12 | 21 | 8  | 1 | 2 | 0 | 1 | - | - | - | 5  |
| MOR173-1  | 20 | 27 | 8  | 2 | 1 | 0 | 1 | - | - | - | 9  |
| MOR264-23 | 23 | 26 | 4  | 3 | 3 | 0 | 2 | - | - | - | 10 |
| MOR174-5  | 19 | 13 | 2  | 2 | 2 | 0 | 0 | - | - | - | 5  |
| MOR245-14 | 15 | 22 | 8  | 3 | 3 | 1 | 0 | - | - | - | 5  |
| MOR245-25 | 17 | 22 | 8  | 3 | 1 | 1 | 0 | - | - | - | 5  |
| MOR36-1   | 12 | 5  | 8  | 2 | 4 | 0 | 0 | - | - | - | 52 |
| MOR218-8  | 19 | 9  | 0  | 1 | 0 | 0 | 0 | - | - | - | 5  |
| MOR213-4  | 15 | 28 | 7  | 1 | 2 | 0 | 0 | - | - | - | 9  |
| MOR127-4  | 23 | 20 | 1  | 3 | 3 | 0 | 0 | - | - | - | 1  |
| MOR160-5  | 15 | 22 | 5  | 3 | 1 | 5 | 0 | - | - | - | 8  |
| MOR135-27 | 18 | 27 | 4  | 4 | 3 | 3 | 1 | - | - | - | 1  |
| MOR135-10 | 22 | 35 | 3  | 3 | 3 | 2 | 0 | - | - | - | 1  |
| MOR225-3  | 17 | 15 | 6  | 2 | 2 | 0 | 0 | - | - | - | 4  |
| MOR103-14 | 14 | 33 | 4  | 0 | 0 | 0 | 0 | - | - | - | 6  |
| MOR130-2  | 20 | 20 | 0  | 1 | 3 | 0 | 0 | - | - | - | 1  |
| MOR257-10 | 24 | 23 | 4  | 1 | 2 | 0 | 0 | - | - | - | 2  |
| MOR260-5  | 24 | 32 | 2  | 4 | 1 | 0 | 0 | - | - | - | 2  |
| MOR227-3  | 23 | 21 | 10 | 1 | 0 | 0 | 0 | - | - | - | 4  |
| MOR30-1   | 10 | 10 | 9  | 4 | 1 | 0 | 0 | - | - | - | 52 |
| MOR261-2  | 17 | 18 | 1  | 2 | 3 | 1 | 1 | - | - | - | 2  |
| MOR135-26 | 18 | 30 | 3  | 3 | 4 | 3 | 2 | - | - | - | 1  |
| MOR183-1  | 17 | 21 | 5  | 1 | 4 | 1 | 0 | - | - | - | 5  |
| MOR135-7  | 18 | 34 | 2  | 4 | 4 | 2 | 1 | - | - | - | 1  |
| MOR263-10 | 16 | 20 | 2  | 0 | 0 | 0 | 0 | - | - | - | 10 |
| MOR245-8  | 20 | 9  | 4  | 3 | 2 | 0 | 1 | - | - | - | 4  |

|           |    |    |   |   |   |   |   |   |   |   |    |
|-----------|----|----|---|---|---|---|---|---|---|---|----|
| MOR41-1   | 16 | 7  | 0 | 1 | 2 | 0 | 0 | - | - | - | 52 |
| MOR283-8  | 18 | 10 | 0 | 4 | 4 | 1 | 2 | - | - | - | 2  |
| MOR106-6  | 18 | 23 | 5 | 2 | 2 | 2 | 3 | - | - | - | 11 |
| MOR106-14 | 14 | 24 | 3 | 3 | 3 | 0 | 5 | - | - | - | 11 |
| MOR118-1  | 20 | 24 | 0 | 2 | 1 | 0 | 0 | - | - | - | 6  |
| MOR244-1  | 21 | 18 | 6 | 0 | 2 | 0 | 0 | - | - | - | 4  |
| MOR256-62 | 17 | 18 | 5 | 3 | 1 | 0 | 0 | - | - | - | 2  |
| MOR42-2   | 20 | 3  | 0 | 1 | 1 | 0 | 0 | - | - | - | 55 |
| MOR25-1   | 11 | 6  | 8 | 3 | 4 | 0 | 0 | - | - | - | 52 |
| MOR40-3   | 11 | 4  | 1 | 4 | 1 | 1 | 0 | - | - | - | 56 |
| MOR155-1  | 19 | 22 | 3 | 1 | 1 | 2 | 1 | - | - | - | 7  |
| MOR259-3  | 18 | 19 | 4 | 2 | 4 | 2 | 0 | - | - | - | 10 |
| MOR267-20 | 16 | 24 | 2 | 4 | 3 | 0 | 0 | - | - | - | 10 |
| MOR267-1  | 14 | 11 | 0 | 3 | 4 | 0 | 0 | - | - | - | 10 |
| MOR254-2  | 21 | 25 | 2 | 0 | 3 | 0 | 2 | - | - | - | 3  |
| MOR248-5  | 20 | 16 | 6 | 2 | 3 | 2 | 1 | - | - | - | 4  |
| MOR267-16 | 18 | 22 | 3 | 2 | 4 | 0 | 0 | - | - | - | 10 |
| MOR256-39 | 17 | 20 | 1 | 3 | 1 | 0 | 0 | - | - | - | 2  |
| MOR261-1  | 30 | 23 | 1 | 0 | 0 | 2 | 0 | - | - | - | 2  |
| MOR103-17 | 20 | 28 | 4 | 1 | 1 | 0 | 0 | - | - | - | 6  |
| MOR40-16  | 14 | 3  | 1 | 4 | 1 | 0 | 0 | - | - | - | 56 |
| MOR232-8  | 17 | 15 | 2 | 1 | 1 | 0 | 1 | - | - | - | 10 |
| MOR241-2  | 14 | 15 | 6 | 3 | 0 | 0 | 0 | - | - | - | 4  |
| MOR172-3  | 18 | 29 | 5 | 2 | 3 | 0 | 2 | - | - | - | 5  |
| MOR221-4  | 18 | 20 | 3 | 1 | 1 | 0 | 2 | - | - | - | 5  |
| MOR222-3  | 15 | 18 | 1 | 1 | 1 | 0 | 0 | - | - | - | 9  |
| MOR206-1  | 19 | 23 | 2 | 1 | 1 | 0 | 0 | - | - | - | 8  |
| MOR101-2  | 16 | 15 | 1 | 1 | 4 | 0 | 0 | - | - | - | 2  |
| MOR256-29 | 18 | 20 | 2 | 3 | 0 | 0 | 0 | - | - | - | 2  |
| MOR145-4  | 21 | 17 | 1 | 2 | 2 | 0 | 0 | - | - | - | 7  |
| MOR135-4  | 21 | 29 | 4 | 2 | 3 | 1 | 1 | - | - | - | 1  |
| MOR241-1  | 16 | 18 | 5 | 4 | 0 | 0 | 0 | - | - | - | 4  |
| MOR159-3  | 20 | 19 | 1 | 0 | 1 | 0 | 0 | - | - | - | 12 |
| MOR146-2  | 21 | 21 | 1 | 2 | 1 | 2 | 3 | - | - | - | 7  |
| MOR219-5  | 15 | 16 | 4 | 0 | 1 | 2 | 0 | - | - | - | 5  |
| MOR219-2  | 16 | 14 | 4 | 1 | 1 | 2 | 0 | - | - | - | 5  |
| MOR219-4  | 11 | 15 | 3 | 0 | 0 | 2 | 0 | - | - | - | 5  |
| MOR219-3  | 15 | 14 | 3 | 0 | 1 | 1 | 0 | - | - | - | 5  |
| MOR251-4  | 13 | 19 | 2 | 0 | 2 | 2 | 1 | - | - | - | 13 |
| MOR203-7  | 17 | 22 | 4 | 1 | 3 | 0 | 0 | - | - | - | 5  |
| MOR207-1  | 15 | 27 | 3 | 4 | 2 | 0 | 0 | - | - | - | 8  |
| MOR192-3  | 19 | 34 | 5 | 2 | 4 | 0 | 0 | - | - | - | 8  |
| MOR212-3  | 20 | 24 | 6 | 1 | 2 | 0 | 0 | - | - | - | 9  |
| MOR182-6  | 18 | 21 | 4 | 1 | 3 | 1 | 1 | - | - | - | 5  |
| MOR255-3  | 21 | 25 | 1 | 1 | 3 | 3 | 0 | - | - | - | 3  |
| MOR210-4  | 16 | 30 | 2 | 0 | 4 | 0 | 1 | - | - | - | 9  |
| MOR146-8  | 19 | 18 | 2 | 2 | 1 | 2 | 2 | - | - | - | 7  |
| MOR148-1  | 18 | 22 | 2 | 3 | 0 | 2 | 1 | - | - | - | 7  |
| MOR261-5  | 26 | 24 | 4 | 3 | 0 | 2 | 0 | - | - | - | 2  |
| MOR173-3  | 20 | 17 | 7 | 1 | 2 | 0 | 1 | - | - | - | 9  |
| MOR129-3  | 22 | 32 | 1 | 1 | 2 | 0 | 0 | - | - | - | 1  |
| MOR197-1  | 26 | 20 | 2 | 4 | 0 | 0 | 0 | - | - | - | 5  |
| MOR106-1  | 24 | 24 | 1 | 0 | 2 | 0 | 0 | - | - | - | 11 |
| MOR213-9  | 17 | 21 | 3 | 0 | 2 | 0 | 0 | - | - | - | 9  |
| MOR202-6  | 9  | 24 | 4 | 2 | 4 | 3 | 2 | - | - | - | 5  |
| MOR174-8  | 20 | 26 | 7 | 1 | 1 | 0 | 0 | - | - | - | 5  |

|           |    |    |    |   |   |   |   |   |   |   |    |
|-----------|----|----|----|---|---|---|---|---|---|---|----|
| MOR106-2  | 15 | 27 | 4  | 2 | 2 | 1 | 4 | - | - | - | 11 |
| MOR177-2  | 18 | 25 | 4  | 1 | 4 | 3 | 1 | - | - | - | 8  |
| MOR177-5  | 15 | 28 | 10 | 2 | 4 | 2 | 1 | - | - | - | 8  |
| MOR127-5  | 20 | 22 | 5  | 4 | 1 | 0 | 1 | - | - | - | 1  |
| MOR220-2  | 17 | 19 | 2  | 1 | 1 | 0 | 2 | - | - | - | 5  |
| MOR221-2  | 18 | 16 | 2  | 1 | 1 | 0 | 2 | - | - | - | 5  |
| MOR175-1  | 24 | 27 | 6  | 4 | 1 | 0 | 0 | - | - | - | 5  |
| MOR211-9  | 17 | 26 | 3  | 0 | 2 | 0 | 1 | - | - | - | 9  |
| MOR262-1  | 22 | 24 | 1  | 2 | 4 | 1 | 0 | - | - | - | 2  |
| MOR203-4  | 21 | 28 | 1  | 2 | 2 | 1 | 0 | - | - | - | 5  |
| MOR219-1  | 18 | 13 | 3  | 0 | 0 | 2 | 0 | - | - | - | 5  |
| MOR103-18 | 20 | 19 | 3  | 0 | 2 | 0 | 0 | - | - | - | 6  |
| MOR150-3  | 21 | 13 | 0  | 4 | 0 | 0 | 1 | - | - | - | 7  |
| MOR251-2  | 16 | 12 | 3  | 1 | 3 | 2 | 2 | - | - | - | 13 |
| MOR129-1  | 24 | 30 | 5  | 2 | 2 | 0 | 0 | - | - | - | 1  |
| MOR246-6  | 18 | 15 | 4  | 4 | 2 | 0 | 1 | - | - | - | 4  |
| MOR264-7  | 22 | 20 | 7  | 2 | 4 | 0 | 1 | - | - | - | 10 |
| MOR160-3  | 17 | 17 | 1  | 1 | 0 | 2 | 0 | - | - | - | 8  |
| MOR261-9  | 24 | 27 | 5  | 1 | 1 | 1 | 0 | - | - | - | 2  |
| MOR224-4  | 18 | 17 | 3  | 0 | 2 | 0 | 0 | - | - | - | 10 |
| MOR266-9  | 19 | 18 | 3  | 0 | 2 | 0 | 1 | - | - | - | 10 |
| MOR119-2  | 11 | 13 | 1  | 1 | 2 | 0 | 0 | - | - | - | 6  |
| MOR174-14 | 19 | 28 | 8  | 1 | 1 | 0 | 0 | - | - | - | 5  |
| MOR122-3  | 19 | 28 | 2  | 1 | 0 | 0 | 1 | - | - | - | 11 |
| MOR104-4  | 22 | 21 | 5  | 1 | 0 | 0 | 0 | - | - | - | 6  |
| MOR254-1  | 21 | 26 | 3  | 0 | 3 | 0 | 2 | - | - | - | 3  |
| MOR264-21 | 22 | 27 | 1  | 4 | 0 | 0 | 1 | - | - | - | 10 |
| MOR156-5  | 22 | 16 | 3  | 0 | 0 | 1 | 1 | - | - | - | 1  |
| MOR156-3  | 24 | 15 | 2  | 0 | 1 | 1 | 1 | - | - | - | 1  |
| MOR249-2  | 14 | 24 | 4  | 1 | 1 | 0 | 0 | - | - | - | 5  |
| MOR267-2  | 18 | 20 | 2  | 2 | 2 | 0 | 0 | - | - | - | 10 |
| MOR147-2  | 25 | 21 | 0  | 4 | 1 | 2 | 1 | - | - | - | 7  |
| MOR179-7  | 11 | 27 | 10 | 1 | 3 | 1 | 1 | - | - | - | 5  |
| MOR175-9  | 22 | 28 | 3  | 0 | 2 | 0 | 0 | - | - | - | 5  |
| MOR135-3  | 21 | 25 | 3  | 2 | 3 | 3 | 1 | - | - | - | 1  |
| MOR172-4  | 17 | 32 | 4  | 2 | 3 | 0 | 2 | - | - | - | 5  |
| MOR202-19 | 12 | 33 | 8  | 3 | 4 | 2 | 2 | - | - | - | 5  |
| MOR255-2  | 22 | 18 | 2  | 1 | 4 | 1 | 0 | - | - | - | 3  |
| MOR255-1  | 25 | 19 | 1  | 0 | 3 | 0 | 0 | - | - | - | 3  |
| MOR215-4  | 15 | 34 | 4  | 1 | 0 | 0 | 0 | - | - | - | 5  |
| MOR261-13 | 22 | 20 | 3  | 2 | 2 | 0 | 1 | - | - | - | 2  |
| MOR256-5  | 18 | 21 | 0  | 4 | 2 | 0 | 0 | - | - | - | 2  |
| MOR106-16 | 24 | 24 | 1  | 0 | 1 | 0 | 0 | - | - | - | 11 |
| MOR174-4  | 17 | 28 | 5  | 3 | 3 | 0 | 1 | - | - | - | 5  |
| MOR214-4  | 17 | 22 | 5  | 1 | 3 | 0 | 1 | - | - | - | 5  |
| MOR267-10 | 16 | 24 | 2  | 4 | 3 | 0 | 0 | - | - | - | 10 |
| MOR149-1  | 20 | 18 | 1  | 1 | 1 | 1 | 1 | - | - | - | 7  |
| MOR264-24 | 25 | 33 | 1  | 1 | 3 | 0 | 0 | - | - | - | 13 |
| MOR251-1  | 17 | 10 | 3  | 1 | 1 | 1 | 1 | - | - | - | 13 |
| MOR267-6  | 10 | 21 | 2  | 0 | 2 | 0 | 0 | - | - | - | 10 |
| MOR141-3  | 21 | 33 | 2  | 4 | 3 | 1 | 0 | - | - | - | 7  |
| MOR242-1  | 16 | 21 | 7  | 0 | 2 | 0 | 0 | - | - | - | 4  |
| MOR266-8  | 19 | 22 | 5  | 3 | 2 | 0 | 1 | - | - | - | 10 |
| MOR256-17 | 15 | 23 | 5  | 2 | 3 | 0 | 0 | - | - | - | 2  |
| MOR225-1  | 20 | 11 | 5  | 3 | 2 | 1 | 0 | - | - | - | 4  |
| MOR251-5  | 14 | 22 | 4  | 2 | 2 | 1 | 0 | - | - | - | 13 |

|           |    |    |    |   |   |   |   |   |   |   |    |
|-----------|----|----|----|---|---|---|---|---|---|---|----|
| MOR149-3  | 16 | 19 | 2  | 4 | 0 | 2 | 0 | - | - | - | 7  |
| MOR143-2  | 15 | 27 | 3  | 1 | 2 | 1 | 0 | - | - | - | 7  |
| MOR146-3  | 18 | 22 | 2  | 2 | 1 | 2 | 3 | - | - | - | 7  |
| MOR264-1  | 24 | 25 | 1  | 4 | 0 | 0 | 2 | - | - | - | 10 |
| MOR145-2  | 18 | 28 | 1  | 1 | 1 | 1 | 0 | - | - | - | 7  |
| MOR258-5  | 23 | 24 | 3  | 3 | 1 | 1 | 1 | - | - | - | 13 |
| MOR262-9  | 26 | 40 | 1  | 2 | 2 | 0 | 0 | - | - | - | 13 |
| MOR145-3  | 21 | 21 | 1  | 1 | 2 | 1 | 0 | - | - | - | 7  |
| MOR264-2  | 18 | 25 | 5  | 3 | 3 | 0 | 1 | - | - | - | 10 |
| MOR264-18 | 16 | 21 | 4  | 1 | 1 | 0 | 2 | - | - | - | 10 |
| MOR152-2  | 15 | 16 | 1  | 4 | 3 | 2 | 0 | - | - | - | 7  |
| MOR126-1  | 24 | 20 | 2  | 1 | 0 | 0 | 0 | - | - | - | 1  |
| MOR267-18 | 15 | 24 | 2  | 4 | 3 | 0 | 0 | - | - | - | 10 |
| MOR155-2  | 15 | 17 | 1  | 1 | 1 | 2 | 0 | - | - | - | 7  |
| MOR227-6  | 15 | 23 | 3  | 1 | 2 | 0 | 2 | - | - | - | 5  |
| MOR125-1  | 17 | 16 | 1  | 4 | 1 | 0 | 0 | - | - | - | 1  |
| MOR135-9  | 26 | 32 | 3  | 1 | 4 | 2 | 2 | - | - | - | 1  |
| MOR145-6  | 20 | 21 | 1  | 2 | 2 | 1 | 0 | - | - | - | 7  |
| MOR103-1  | 18 | 23 | 2  | 1 | 0 | 0 | 0 | - | - | - | 6  |
| MOR257-3  | 18 | 16 | 3  | 2 | 0 | 0 | 0 | - | - | - | 2  |
| MOR138-3  | 19 | 22 | 3  | 4 | 3 | 0 | 1 | - | - | - | 1  |
| MOR122-1  | 17 | 24 | 4  | 1 | 0 | 0 | 0 | - | - | - | 11 |
| MOR233-1  | 23 | 26 | 7  | 3 | 3 | 0 | 3 | - | - | - | 4  |
| MOR156-1  | 25 | 15 | 4  | 0 | 0 | 1 | 1 | - | - | - | 1  |
| MOR240-2  | 16 | 17 | 5  | 2 | 2 | 1 | 0 | - | - | - | 4  |
| MOR119-1  | 17 | 13 | 2  | 1 | 2 | 0 | 0 | - | - | - | 6  |
| MOR103-10 | 15 | 22 | 1  | 1 | 1 | 0 | 0 | - | - | - | 6  |
| MOR103-5  | 19 | 25 | 0  | 0 | 0 | 0 | 0 | - | - | - | 6  |
| MOR256-48 | 18 | 20 | 0  | 4 | 2 | 0 | 0 | - | - | - | 2  |
| MOR273-2  | 14 | 16 | 2  | 2 | 2 | 0 | 0 | - | - | - | 2  |
| MOR285-2  | 19 | 11 | 2  | 2 | 0 | 0 | 0 | - | - | - | 2  |
| MOR233-3  | 22 | 25 | 8  | 3 | 2 | 2 | 2 | - | - | - | 4  |
| MOR233-8  | 25 | 21 | 7  | 2 | 1 | 2 | 1 | - | - | - | 4  |
| MOR279-1  | 18 | 11 | 3  | 2 | 2 | 1 | 1 | - | - | - | 2  |
| MOR260-1  | 26 | 29 | 1  | 4 | 3 | 2 | 0 | - | - | - | 2  |
| MOR248-6  | 20 | 16 | 5  | 1 | 4 | 1 | 1 | - | - | - | 4  |
| MOR267-5  | 17 | 21 | 2  | 0 | 3 | 0 | 0 | - | - | - | 10 |
| MOR282-1  | 18 | 17 | 1  | 3 | 1 | 0 | 0 | - | - | - | 2  |
| MOR220-3  | 15 | 15 | 2  | 1 | 2 | 0 | 3 | - | - | - | 5  |
| MOR261-11 | 21 | 15 | 0  | 1 | 3 | 0 | 1 | - | - | - | 2  |
| MOR261-6  | 29 | 20 | 1  | 0 | 1 | 0 | 0 | - | - | - | 2  |
| MOR266-6  | 12 | 16 | 1  | 2 | 2 | 0 | 1 | - | - | - | 10 |
| MOR270-1  | 15 | 19 | 3  | 1 | 1 | 2 | 0 | - | - | - | 2  |
| MOR280-1  | 15 | 8  | 1  | 3 | 1 | 0 | 1 | - | - | - | 2  |
| MOR256-23 | 13 | 24 | 3  | 2 | 2 | 0 | 2 | - | - | - | 2  |
| MOR256-14 | 19 | 19 | 4  | 4 | 1 | 1 | 0 | - | - | - | 2  |
| MOR264-11 | 24 | 20 | 5  | 1 | 3 | 0 | 1 | - | - | - | 10 |
| MOR103-16 | 16 | 27 | 0  | 0 | 3 | 0 | 0 | - | - | - | 6  |
| MOR128-2  | 21 | 22 | 6  | 2 | 1 | 1 | 0 | - | - | - | 1  |
| MOR103-15 | 21 | 34 | 2  | 0 | 1 | 0 | 0 | - | - | - | 6  |
| MOR210-1  | 20 | 29 | 6  | 0 | 1 | 0 | 0 | - | - | - | 9  |
| MOR179-4  | 14 | 29 | 10 | 2 | 2 | 2 | 0 | - | - | - | 5  |
| MOR283-7  | 20 | 8  | 2  | 1 | 3 | 6 | 4 | - | - | - | 2  |
| MOR257-4  | 19 | 26 | 1  | 0 | 2 | 0 | 0 | - | - | - | 2  |
| MOR268-5  | 16 | 23 | 1  | 4 | 3 | 2 | 3 | - | - | - | 10 |
| MOR120-1  | 12 | 16 | 4  | 0 | 0 | 0 | 1 | - | - | - | 9  |



|           |    |    |    |   |   |   |   |   |   |   |    |
|-----------|----|----|----|---|---|---|---|---|---|---|----|
| MOR106-9  | 16 | 23 | 3  | 1 | 4 | 1 | 0 | - | - | - | 11 |
| MOR158-1  | 7  | 18 | 1  | 3 | 2 | 0 | 0 | - | - | - | 1  |
| MOR133-1  | 20 | 16 | 1  | 4 | 0 | 0 | 0 | - | - | - | 1  |
| MOR248-8  | 19 | 16 | 7  | 2 | 3 | 1 | 2 | - | - | - | 4  |
| MOR272-1  | 17 | 20 | 2  | 0 | 1 | 2 | 1 | - | - | - | 2  |
| MOR276-2  | 18 | 11 | 0  | 3 | 1 | 0 | 0 | - | - | - | 2  |
| MOR284-2  | 18 | 11 | 0  | 0 | 1 | 0 | 1 | - | - | - | 2  |
| MOR206-4  | 17 | 29 | 4  | 0 | 1 | 0 | 0 | - | - | - | 8  |
| MOR202-9  | 19 | 19 | 4  | 1 | 3 | 0 | 0 | - | - | - | 5  |
| MOR282-2  | 18 | 15 | 1  | 3 | 1 | 0 | 0 | - | - | - | 2  |
| MOR283-11 | 15 | 12 | 2  | 0 | 2 | 6 | 1 | - | - | - | 2  |
| MOR283-4  | 17 | 12 | 2  | 2 | 3 | 5 | 3 | - | - | - | 2  |
| MOR250-4  | 22 | 13 | 1  | 0 | 2 | 0 | 0 | - | - | - | 12 |
| MOR239-5  | 20 | 13 | 4  | 4 | 1 | 0 | 0 | - | - | - | 4  |
| MOR266-1  | 21 | 23 | 4  | 3 | 2 | 0 | 1 | - | - | - | 10 |
| MOR246-1  | 16 | 20 | 6  | 2 | 1 | 0 | 1 | - | - | - | 4  |
| MOR266-5  | 19 | 17 | 2  | 1 | 3 | 1 | 0 | - | - | - | 10 |
| MOR263-5  | 17 | 31 | 4  | 2 | 2 | 0 | 0 | - | - | - | 10 |
| MOR283-1  | 19 | 10 | 2  | 2 | 3 | 6 | 1 | - | - | - | 2  |
| MOR283-12 | 18 | 11 | 1  | 4 | 4 | 7 | 4 | - | - | - | 2  |
| MOR122-2  | 20 | 25 | 1  | 0 | 0 | 0 | 0 | - | - | - | 11 |
| MOR263-12 | 16 | 30 | 4  | 2 | 2 | 0 | 0 | - | - | - | 10 |
| MOR263-9  | 16 | 21 | 2  | 2 | 0 | 0 | 0 | - | - | - | 10 |
| MOR212-2  | 17 | 26 | 5  | 1 | 2 | 0 | 0 | - | - | - | 9  |
| MOR179-6  | 15 | 34 | 8  | 3 | 3 | 0 | 0 | - | - | - | 5  |
| MOR283-5  | 13 | 9  | 1  | 2 | 3 | 5 | 1 | - | - | - | 2  |
| MOR256-63 | 12 | 21 | 1  | 3 | 1 | 0 | 1 | - | - | - | 2  |
| MOR239-6  | 17 | 17 | 8  | 3 | 3 | 0 | 0 | - | - | - | 4  |
| MOR179-2  | 16 | 28 | 8  | 2 | 3 | 1 | 0 | - | - | - | 5  |
| MOR222-2  | 14 | 23 | 0  | 0 | 2 | 0 | 1 | - | - | - | 9  |
| MOR102-1  | 13 | 22 | 2  | 0 | 2 | 0 | 0 | - | - | - | 13 |
| MOR170-14 | 16 | 17 | 4  | 0 | 3 | 0 | 0 | - | - | - | 8  |
| MOR159-4  | 21 | 22 | 1  | 0 | 0 | 0 | 0 | - | - | - | 12 |
| MOR233-15 | 21 | 26 | 6  | 4 | 2 | 2 | 2 | - | - | - | 4  |
| MOR283-10 | 18 | 15 | 1  | 1 | 4 | 4 | 1 | - | - | - | 2  |
| MOR267-14 | 12 | 9  | 4  | 2 | 0 | 1 | 0 | - | - | - | 10 |
| MOR256-54 | 8  | 22 | 2  | 3 | 4 | 0 | 2 | - | - | - | 2  |
| MOR256-22 | 11 | 26 | 6  | 3 | 4 | 0 | 1 | - | - | - | 2  |
| MOR256-1  | 16 | 31 | 2  | 4 | 2 | 0 | 1 | - | - | - | 2  |
| MOR256-58 | 10 | 23 | 4  | 3 | 3 | 0 | 1 | - | - | - | 2  |
| MOR256-57 | 11 | 24 | 4  | 3 | 2 | 0 | 1 | - | - | - | 2  |
| MOR256-26 | 11 | 24 | 3  | 3 | 3 | 0 | 1 | - | - | - | 2  |
| MOR251-3  | 15 | 22 | 4  | 2 | 0 | 1 | 0 | - | - | - | 13 |
| MOR239-3  | 18 | 15 | 4  | 3 | 1 | 1 | 0 | - | - | - | 4  |
| MOR123-1  | 15 | 13 | 1  | 1 | 2 | 0 | 0 | - | - | - | 10 |
| MOR123-2  | 13 | 16 | 0  | 1 | 2 | 0 | 0 | - | - | - | 10 |
| MOR105-10 | 18 | 17 | 2  | 0 | 1 | 0 | 0 | - | - | - | 6  |
| MOR106-3  | 18 | 28 | 6  | 3 | 3 | 2 | 4 | - | - | - | 11 |
| MOR256-20 | 19 | 19 | 1  | 2 | 1 | 0 | 0 | - | - | - | 2  |
| MOR248-19 | 19 | 15 | 3  | 2 | 4 | 1 | 2 | - | - | - | 4  |
| MOR248-20 | 19 | 15 | 3  | 2 | 4 | 1 | 2 | - | - | - | 4  |
| MOR245-9  | 16 | 13 | 4  | 3 | 3 | 1 | 0 | - | - | - | 4  |
| MOR177-4  | 14 | 29 | 10 | 2 | 4 | 1 | 0 | - | - | - | 8  |
| MOR106-5  | 16 | 19 | 2  | 1 | 4 | 0 | 0 | - | - | - | 11 |
| MOR105-1  | 24 | 26 | 1  | 1 | 3 | 0 | 0 | - | - | - | 6  |
| MOR220-1  | 18 | 16 | 2  | 0 | 1 | 0 | 2 | - | - | - | 5  |

|           |    |    |    |   |   |   |   |   |   |   |    |
|-----------|----|----|----|---|---|---|---|---|---|---|----|
| MOR245-13 | 13 | 19 | 1  | 2 | 4 | 1 | 0 | - | - | - | 4  |
| MOR105-2  | 19 | 13 | 0  | 1 | 2 | 1 | 0 | - | - | - | 6  |
| MOR233-5  | 26 | 26 | 11 | 3 | 2 | 2 | 2 | - | - | - | 4  |
| MOR218-2  | 16 | 13 | 4  | 1 | 0 | 0 | 3 | - | - | - | 5  |
| MOR120-2  | 11 | 12 | 4  | 0 | 0 | 0 | 0 | - | - | - | 9  |
| MOR233-21 | 21 | 20 | 10 | 4 | 1 | 1 | 1 | - | - | - | 4  |
| MOR257-9  | 18 | 21 | 0  | 1 | 2 | 1 | 0 | - | - | - | 2  |
| MOR266-10 | 23 | 14 | 3  | 1 | 2 | 0 | 0 | - | - | - | 10 |
| MOR218-10 | 13 | 17 | 4  | 1 | 0 | 0 | 2 | - | - | - | 5  |
| MOR205-2  | 16 | 16 | 4  | 0 | 1 | 0 | 0 | - | - | - | 5  |
| MOR285-5  | 19 | 13 | 1  | 2 | 1 | 1 | 0 | - | - | - | 2  |
| MOR256-49 | 8  | 18 | 2  | 4 | 1 | 0 | 1 | - | - | - | 2  |
| MOR222-4  | 12 | 22 | 0  | 0 | 1 | 0 | 1 | - | - | - | 9  |
| MOR269-2  | 14 | 15 | 2  | 0 | 2 | 0 | 1 | - | - | - | 10 |
| MOR105-4  | 19 | 15 | 0  | 0 | 1 | 0 | 0 | - | - | - | 6  |
| MOR106-15 | 16 | 21 | 5  | 2 | 2 | 2 | 3 | - | - | - | 11 |
| MOR218-12 | 18 | 12 | 4  | 3 | 0 | 0 | 3 | - | - | - | 5  |
| MOR218-13 | 16 | 13 | 4  | 3 | 0 | 0 | 2 | - | - | - | 5  |
| MOR262-4  | 20 | 29 | 5  | 3 | 3 | 0 | 0 | - | - | - | 13 |
| MOR268-3  | 15 | 27 | 1  | 4 | 4 | 3 | 2 | - | - | - | 10 |
| MOR105-11 | 20 | 13 | 0  | 1 | 2 | 0 | 0 | - | - | - | 6  |
| MOR225-7  | 14 | 14 | 8  | 1 | 1 | 0 | 0 | - | - | - | 4  |
| MOR231-5  | 20 | 12 | 3  | 4 | 0 | 3 | 1 | - | - | - | 4  |
| MOR218-11 | 13 | 13 | 4  | 3 | 0 | 0 | 2 | - | - | - | 5  |
| MOR157-1  | 10 | 12 | 1  | 1 | 1 | 0 | 0 | - | - | - | 1  |
| MOR245-2  | 16 | 11 | 4  | 2 | 4 | 0 | 0 | - | - | - | 4  |
| MOR250-1  | 22 | 19 | 2  | 0 | 1 | 0 | 0 | - | - | - | 12 |
| MOR268-4  | 18 | 22 | 1  | 3 | 0 | 4 | 2 | - | - | - | 10 |
| MOR267-7  | 2  | 19 | 0  | 1 | 2 | 0 | 1 | - | - | - | 10 |
| MOR202-41 | 16 | 19 | 3  | 1 | 1 | 0 | 0 | - | - | - | 5  |
| MOR248-1  | 20 | 21 | 4  | 3 | 3 | 1 | 2 | - | - | - | 4  |
| MOR268-6  | 7  | 16 | 1  | 1 | 2 | 1 | 0 | - | - | - | 10 |
| MOR204-20 | 8  | 21 | 1  | 3 | 3 | 0 | 0 | - | - | - | 5  |
| MOR218-9  | 12 | 16 | 4  | 3 | 0 | 0 | 2 | - | - | - | 5  |
| MOR269-1  | 18 | 17 | 1  | 1 | 1 | 0 | 0 | - | - | - | 10 |
| MOR124-1  | 18 | 10 | 0  | 1 | 1 | 0 | 0 | - | - | - | 2  |
| MOR241-3  | 15 | 17 | 5  | 2 | 1 | 1 | 0 | - | - | - | 4  |
| MOR246-5  | 21 | 14 | 2  | 2 | 4 | 0 | 0 | - | - | - | 4  |
| MOR245-7  | 19 | 11 | 6  | 4 | 4 | 1 | 0 | - | - | - | 4  |
| MOR247-1  | 16 | 12 | 2  | 1 | 2 | 0 | 0 | - | - | - | 4  |
