# Supplementary material for: Common peptides shed light on evolution of Olfactory Receptors
Source: PubMed Central journal article supplement (PMC2681464; doi:10.1186/1471-2148-9-91), 2009-05-05
Supplement: 1471-2148-9-91-S10.pdf [file 1471-2148-9-91-S10.pdf]

| Name        | Number of A1 CPs | Number of A8 novel CPs | Number of pufferfish novel CPs | Cluster number A1 novel CPs |
|-------------|------------------|------------------------|--------------------------------|-----------------------------|
| Fr3OR117.2  | 9                | 0                      | 1                              | 1                           |
| Fr3OR2346.1 | 10               | 0                      | 0                              | 1                           |
| Fr3OR2346.3 | 17               | 2                      | 4                              | 1                           |
| Fr3OR2346.4 | 12               | 1                      | 0                              | 1                           |
| Fr3OR3630.1 | 21               | 0                      | 1                              | 1                           |
| Fr3OR4429.2 | 20               | 0                      | 1                              | 1                           |
| Fr3OR7149.1 | 10               | 0                      | 0                              | 1                           |
| Fr3OR3905.1 | 8                | 1                      | 1                              | 2                           |
| AB031380    | 11               | 1                      | 6                              | 3                           |
| AB031383    | 10               | 1                      | 6                              | 3                           |
| AB031384    | 7                | 1                      | 6                              | 3                           |
| Fr3OR4479.2 | 10               | 1                      | 7                              | 3                           |
| Fr3OR6269.1 | 8                | 1                      | 6                              | 3                           |
| Fr3OR119.1  | 10               | 1                      | 0                              | 4                           |
| Fr3OR142.7  | 9                | 0                      | 0                              | 4                           |
| Fr3OR4429.1 | 7                | 0                      | 0                              | 5                           |
| Fr3OR5287.2 | 16               | 0                      | 0                              | 5                           |
| Fr3OR117.1  | 19               | 2                      | 0                              | 6                           |
| Fr3OR123.1  | 18               | 3                      | 2                              | 6                           |
| Fr3OR2346.2 | 15               | 3                      | 2                              | 6                           |
| Fr3OR2346.7 | 18               | 1                      | 6                              | 6                           |
| Fr3OR3763.1 | 17               | 1                      | 5                              | 6                           |
| Fr3OR3763.2 | 17               | 2                      | 8                              | 6                           |
| Fr3OR4133.2 | 20               | 2                      | 7                              | 6                           |
| Fr3OR6765.1 | 18               | 1                      | 5                              | 6                           |
| Fr3OR142.1  | 10               | 0                      | 0                              | 7                           |
| Fr3OR6818.1 | 5                | 1                      | 1                              | 7                           |
| Fr3OR7011.1 | 7                | 1                      | 0                              | 7                           |
| AB031385    | 14               | 2                      | 1                              | 8                           |
| Fr3OR123.2  | 13               | 0                      | 0                              | 8                           |
| Fr3OR5510.2 | 19               | 0                      | 1                              | 8                           |
| Fr3OR5511.2 | 18               | 0                      | 0                              | 8                           |
| Fr3OR142.3  | 12               | 0                      | 2                              | 9                           |
| Fr3OR142.6  | 9                | 0                      | 0                              | 9                           |
| Fr3OR1026.2 | 16               | 1                      | 2                              | 10                          |
| Fr3OR2346.5 | 9                | 0                      | 0                              | 10                          |
| Fr3OR4563.4 | 12               | 0                      | 2                              | 10                          |
| Fr3OR4563.5 | 14               | 1                      | 1                              | 10                          |
| Fr3OR8298.1 | 17               | 1                      | 1                              | 10                          |
| Fr3OR18.1   | 3                | 0                      | 0                              | -                           |
| Fr3OR217.1  | 4                | 1                      | 1                              | -                           |
| Fr3OR59.1   | 1                | 0                      | 1                              | -                           |
| Fr3OR6030.1 | 1                | 0                      | 0                              | -                           |
| Fr3OR633.1  | 0                | 0                      | 1                              | -                           |
