# Supplementary material for: Common peptides shed light on evolution of Olfactory Receptors
Source: Springer Nature journal article supplement (doi:10.1186/1471-2148-9-91), 2009-01-01
Supplement: Additional file 12 [file 1471-2148-9-91-s12.pdf]

Legend

|   |                              |
|---|------------------------------|
| A | Number of A1 CPs             |
| B | Number of A2 novel CPs       |
| C | Number of A3 novel CPs       |
| D | Number of A4 novel CPs       |
| E | Number of platypus novel CPs |
| F | Cluster number A3 novel CPs  |
| G | Cluster number A4 novel CPs  |

| Name       | A  | B  | C  | D  | E | F | G |
|------------|----|----|----|----|---|---|---|
| Plat_OR599 | 25 | 18 | 5  | 8  | 0 | 1 | 3 |
| Plat_OR609 | 23 | 18 | 7  | 11 | 0 | 1 | 3 |
| Plat_OR610 | 28 | 20 | 6  | 6  | 0 | 1 | 3 |
| Plat_OR611 | 22 | 18 | 7  | 12 | 0 | 1 | 3 |
| Plat_OR613 | 21 | 21 | 5  | 5  | 0 | 1 | 3 |
| Plat_OR616 | 24 | 16 | 8  | 7  | 0 | 1 | 3 |
| Plat_OR593 | 25 | 25 | 9  | 4  | 0 | 1 | - |
| Plat_OR136 | 20 | 20 | 5  | 6  | 4 | 2 | 6 |
| Plat_OR357 | 19 | 16 | 7  | 5  | 3 | 2 | 6 |
| Plat_OR476 | 24 | 21 | 5  | 6  | 5 | 2 | 6 |
| Plat_OR477 | 20 | 17 | 5  | 2  | 6 | 2 | 6 |
| Plat_OR371 | 24 | 21 | 5  | 3  | 0 | 2 | - |
| Plat_OR396 | 15 | 33 | 5  | 2  | 0 | 2 | - |
| Plat_OR406 | 22 | 20 | 7  | 3  | 5 | 2 | - |
| Plat_OR475 | 27 | 21 | 7  | 6  | 3 | 2 | - |
| Plat_OR493 | 25 | 22 | 6  | 3  | 3 | 2 | - |
| Plat_OR542 | 11 | 8  | 5  | 4  | 1 | 2 | - |
| Plat_OR553 | 22 | 18 | 5  | 4  | 6 | 2 | - |
| Plat_OR556 | 17 | 13 | 6  | 4  | 7 | 2 | - |
| Plat_OR583 | 24 | 23 | 7  | 2  | 4 | 2 | - |
| Plat_OR712 | 19 | 23 | 6  | 3  | 4 | 2 | - |
| Plat_OR713 | 22 | 25 | 5  | 2  | 5 | 2 | - |
| Plat_OR714 | 25 | 25 | 6  | 3  | 5 | 2 | - |
| Plat_OR715 | 20 | 28 | 6  | 3  | 2 | 2 | - |
| Plat_OR244 | 17 | 24 | 7  | 2  | 0 | 3 | - |
| Plat_OR479 | 22 | 29 | 8  | 3  | 0 | 3 | - |
| Plat_OR689 | 15 | 43 | 6  | 4  | 0 | 3 | - |
| Plat_OR697 | 20 | 38 | 8  | 0  | 0 | 3 | - |
| Plat_OR728 | 21 | 43 | 6  | 1  | 0 | 3 | - |
| Plat_OR729 | 21 | 44 | 6  | 2  | 0 | 3 | - |
| Plat_OR738 | 15 | 26 | 6  | 2  | 0 | 3 | - |
| Plat_OR739 | 20 | 29 | 6  | 2  | 1 | 3 | - |
| Plat_OR744 | 19 | 29 | 7  | 1  | 0 | 3 | - |
| Plat_OR745 | 20 | 38 | 5  | 1  | 1 | 3 | - |
| Plat_OR746 | 22 | 35 | 6  | 3  | 0 | 3 | - |
| Plat_OR334 | 13 | 7  | 8  | 5  | 0 | 4 | 1 |
| Plat_OR202 | 10 | 7  | 6  | 8  | 1 | 4 | 2 |
| Plat_OR39  | 16 | 8  | 11 | 9  | 0 | 4 | 6 |
| Plat_OR403 | 19 | 7  | 13 | 6  | 0 | 4 | 6 |
| Plat_OR344 | 11 | 7  | 8  | 4  | 0 | 4 | - |
| Plat_OR379 | 12 | 2  | 5  | 5  | 0 | 4 | - |
| Plat_OR430 | 17 | 5  | 9  | 5  | 0 | 4 | - |

|            |    |    |    |    |    |    |   |
|------------|----|----|----|----|----|----|---|
| Plat_OR687 | 27 | 26 | 6  | 11 | 0  | 5  | 3 |
| Plat_OR348 | 23 | 25 | 5  | 2  | 0  | 5  | - |
| Plat_OR349 | 22 | 28 | 5  | 2  | 0  | 5  | - |
| Plat_OR199 | 17 | 18 | 9  | 8  | 0  | 6  | 3 |
| Plat_OR205 | 20 | 15 | 8  | 6  | 1  | 6  | 3 |
| Plat_OR378 | 19 | 20 | 9  | 6  | 1  | 6  | 3 |
| Plat_OR424 | 20 | 15 | 6  | 7  | 1  | 6  | 3 |
| Plat_OR500 | 19 | 11 | 7  | 9  | 1  | 6  | 3 |
| Plat_OR520 | 18 | 13 | 9  | 10 | 0  | 6  | 3 |
| Plat_OR162 | 19 | 17 | 7  | 3  | 0  | 6  | - |
| Plat_OR591 | 21 | 23 | 6  | 1  | 0  | 6  | - |
| Plat_OR702 | 17 | 15 | 6  | 4  | 1  | 6  | - |
| Plat_OR230 | 22 | 27 | 6  | 6  | 1  | 7  | 1 |
| Plat_OR531 | 25 | 36 | 5  | 9  | 0  | 7  | 1 |
| Plat_OR517 | 17 | 21 | 6  | 6  | 0  | 7  | 5 |
| Plat_OR337 | 14 | 24 | 6  | 7  | 0  | 7  | - |
| Plat_OR91  | 25 | 26 | 5  | 3  | 4  | 7  | - |
| Plat_OR596 | 19 | 20 | 8  | 5  | 0  | 8  | 3 |
| Plat_OR600 | 27 | 23 | 7  | 9  | 0  | 8  | 3 |
| Plat_OR618 | 25 | 15 | 8  | 8  | 0  | 8  | 3 |
| Plat_OR594 | 19 | 25 | 6  | 3  | 0  | 8  | - |
| Plat_OR606 | 23 | 14 | 5  | 4  | 0  | 8  | - |
| Plat_OR659 | 22 | 35 | 8  | 7  | 0  | 9  | - |
| Plat_OR719 | 19 | 27 | 6  | 4  | 0  | 9  | - |
| Plat_OR725 | 12 | 38 | 11 | 3  | 0  | 9  | - |
| Plat_OR726 | 16 | 35 | 11 | 2  | 0  | 9  | - |
| Plat_OR742 | 16 | 26 | 5  | 3  | 0  | 9  | - |
| Plat_OR204 | 16 | 17 | 5  | 5  | 7  | 10 | 6 |
| Plat_OR289 | 22 | 20 | 6  | 8  | 5  | 10 | 6 |
| Plat_OR374 | 20 | 20 | 6  | 8  | 6  | 10 | 6 |
| Plat_OR397 | 21 | 20 | 5  | 8  | 6  | 10 | 6 |
| Plat_OR446 | 14 | 17 | 5  | 5  | 7  | 10 | 6 |
| Plat_OR101 | 25 | 23 | 5  | 2  | 4  | 10 | - |
| Plat_OR181 | 14 | 17 | 6  | 2  | 11 | 10 | - |
| Plat_OR227 | 15 | 15 | 6  | 2  | 10 | 10 | - |
| Plat_OR251 | 15 | 17 | 6  | 2  | 10 | 10 | - |
| Plat_OR298 | 16 | 15 | 6  | 2  | 11 | 10 | - |
| Plat_OR317 | 20 | 21 | 5  | 3  | 0  | 10 | - |
| Plat_OR459 | 17 | 14 | 6  | 2  | 8  | 10 | - |
| Plat_OR214 | 9  | 11 | 7  | 8  | 0  | 11 | 1 |
| Plat_OR196 | 17 | 16 | 11 | 5  | 0  | 11 | 5 |
| Plat_OR208 | 12 | 6  | 6  | 6  | 0  | 11 | 5 |
| Plat_OR325 | 10 | 8  | 5  | 5  | 0  | 11 | 5 |
| Plat_OR342 | 12 | 9  | 10 | 8  | 0  | 11 | 5 |
| Plat_OR389 | 15 | 14 | 8  | 5  | 0  | 11 | 5 |
| Plat_OR193 | 11 | 9  | 8  | 2  | 0  | 11 | - |
| Plat_OR250 | 17 | 11 | 12 | 4  | 0  | 11 | - |
| Plat_OR254 | 16 | 17 | 13 | 2  | 0  | 11 | - |
| Plat_OR528 | 14 | 6  | 7  | 4  | 0  | 11 | - |
| Plat_OR305 | 10 | 22 | 5  | 2  | 2  | 12 | - |
| Plat_OR335 | 11 | 23 | 6  | 2  | 2  | 12 | - |
| Plat_OR639 | 21 | 25 | 6  | 2  | 2  | 12 | - |

|            |    |    |   |    |   |    |   |
|------------|----|----|---|----|---|----|---|
| Plat_OR734 | 22 | 26 | 6 | 4  | 2 | 12 | - |
| Plat_OR215 | 26 | 29 | 1 | 6  | 2 | -  | 1 |
| Plat_OR328 | 25 | 33 | 0 | 10 | 2 | -  | 1 |
| Plat_OR355 | 23 | 31 | 1 | 5  | 2 | -  | 1 |
| Plat_OR414 | 20 | 34 | 1 | 10 | 1 | -  | 1 |
| Plat_OR435 | 22 | 36 | 1 | 6  | 1 | -  | 1 |
| Plat_OR484 | 17 | 36 | 0 | 6  | 3 | -  | 1 |
| Plat_OR50  | 25 | 34 | 1 | 7  | 3 | -  | 1 |
| Plat_OR80  | 20 | 26 | 0 | 7  | 1 | -  | 1 |
| Plat_OR245 | 14 | 3  | 4 | 8  | 5 | -  | 2 |
| Plat_OR422 | 14 | 4  | 3 | 8  | 4 | -  | 2 |
| Plat_OR423 | 13 | 5  | 3 | 6  | 0 | -  | 2 |
| Plat_OR525 | 15 | 4  | 4 | 8  | 3 | -  | 2 |
| Plat_OR540 | 13 | 4  | 3 | 5  | 4 | -  | 2 |
| Plat_OR548 | 13 | 4  | 4 | 9  | 4 | -  | 2 |
| Plat_OR67  | 13 | 3  | 3 | 9  | 0 | -  | 2 |
| Plat_OR213 | 19 | 11 | 2 | 7  | 0 | -  | 3 |
| Plat_OR224 | 18 | 8  | 4 | 6  | 1 | -  | 3 |
| Plat_OR598 | 28 | 22 | 3 | 10 | 0 | -  | 3 |
| Plat_OR602 | 18 | 17 | 4 | 6  | 0 | -  | 3 |
| Plat_OR607 | 24 | 14 | 3 | 7  | 1 | -  | 3 |
| Plat_OR608 | 20 | 27 | 4 | 7  | 0 | -  | 3 |
| Plat_OR614 | 22 | 12 | 6 | 6  | 0 | -  | 3 |
| Plat_OR749 | 25 | 29 | 2 | 8  | 0 | -  | 3 |
| Plat_OR751 | 24 | 21 | 4 | 8  | 0 | -  | 3 |
| Plat_OR764 | 25 | 22 | 4 | 7  | 0 | -  | 3 |
| Plat_OR257 | 25 | 24 | 1 | 11 | 0 | -  | 4 |
| Plat_OR288 | 19 | 22 | 2 | 17 | 0 | -  | 4 |
| Plat_OR297 | 16 | 16 | 3 | 16 | 0 | -  | 4 |
| Plat_OR322 | 19 | 26 | 2 | 10 | 0 | -  | 4 |
| Plat_OR326 | 16 | 20 | 3 | 8  | 0 | -  | 4 |
| Plat_OR426 | 20 | 22 | 2 | 7  | 0 | -  | 4 |
| Plat_OR427 | 25 | 25 | 3 | 6  | 0 | -  | 4 |
| Plat_OR545 | 13 | 24 | 4 | 9  | 0 | -  | 4 |
| Plat_OR552 | 17 | 23 | 4 | 11 | 0 | -  | 4 |
| Plat_OR58  | 24 | 23 | 1 | 11 | 0 | -  | 4 |
| Plat_OR158 | 10 | 2  | 4 | 6  | 0 | -  | 5 |
| Plat_OR388 | 14 | 4  | 5 | 7  | 0 | -  | 5 |
| Plat_OR437 | 6  | 17 | 3 | 10 | 1 | -  | 5 |
| Plat_OR490 | 17 | 22 | 3 | 7  | 0 | -  | 5 |
| Plat_OR568 | 17 | 30 | 0 | 8  | 0 | -  | 5 |
| Plat_OR681 | 17 | 30 | 4 | 7  | 0 | -  | 5 |
| Plat_OR691 | 15 | 22 | 4 | 7  | 0 | -  | 5 |
| Plat_OR692 | 15 | 26 | 2 | 5  | 0 | -  | 5 |
| Plat_OR151 | 31 | 28 | 3 | 5  | 8 | -  | 6 |
| Plat_OR165 | 20 | 18 | 2 | 7  | 4 | -  | 6 |
| Plat_OR562 | 13 | 13 | 4 | 5  | 4 | -  | 6 |
| Plat_OR118 | 17 | 25 | 3 | 1  | 0 | -  | - |
| Plat_OR123 | 19 | 26 | 3 | 2  | 0 | -  | - |
| Plat_OR131 | 22 | 18 | 4 | 2  | 0 | -  | - |
| Plat_OR145 | 16 | 14 | 4 | 8  | 0 | -  | - |
| Plat_OR152 | 21 | 15 | 1 | 0  | 0 | -  | - |

|            |    |    |   |   |    |   |   |
|------------|----|----|---|---|----|---|---|
| Plat_OR157 | 30 | 20 | 4 | 3 | 9  | - | - |
| Plat_OR167 | 17 | 17 | 1 | 0 | 0  | - | - |
| Plat_OR168 | 17 | 20 | 0 | 3 | 0  | - | - |
| Plat_OR184 | 23 | 27 | 2 | 2 | 2  | - | - |
| Plat_OR189 | 18 | 20 | 4 | 3 | 0  | - | - |
| Plat_OR190 | 13 | 13 | 4 | 1 | 2  | - | - |
| Plat_OR201 | 17 | 14 | 4 | 6 | 0  | - | - |
| Plat_OR212 | 22 | 26 | 3 | 2 | 0  | - | - |
| Plat_OR233 | 17 | 29 | 2 | 3 | 1  | - | - |
| Plat_OR238 | 20 | 20 | 3 | 4 | 0  | - | - |
| Plat_OR260 | 19 | 27 | 4 | 3 | 5  | - | - |
| Plat_OR262 | 25 | 19 | 4 | 4 | 5  | - | - |
| Plat_OR271 | 15 | 25 | 3 | 1 | 1  | - | - |
| Plat_OR278 | 13 | 17 | 4 | 3 | 4  | - | - |
| Plat_OR281 | 30 | 22 | 4 | 3 | 7  | - | - |
| Plat_OR282 | 10 | 23 | 4 | 1 | 2  | - | - |
| Plat_OR290 | 15 | 22 | 4 | 3 | 6  | - | - |
| Plat_OR30  | 16 | 9  | 3 | 0 | 1  | - | - |
| Plat_OR308 | 17 | 22 | 3 | 1 | 0  | - | - |
| Plat_OR314 | 18 | 22 | 3 | 3 | 6  | - | - |
| Plat_OR330 | 19 | 19 | 2 | 4 | 8  | - | - |
| Plat_OR336 | 18 | 18 | 3 | 1 | 0  | - | - |
| Plat_OR34  | 18 | 21 | 2 | 3 | 5  | - | - |
| Plat_OR347 | 12 | 23 | 5 | 3 | 0  | - | - |
| Plat_OR35  | 20 | 17 | 4 | 1 | 0  | - | - |
| Plat_OR363 | 10 | 19 | 4 | 2 | 0  | - | - |
| Plat_OR369 | 18 | 25 | 3 | 3 | 0  | - | - |
| Plat_OR382 | 22 | 12 | 1 | 0 | 0  | - | - |
| Plat_OR383 | 15 | 22 | 4 | 4 | 0  | - | - |
| Plat_OR399 | 15 | 23 | 3 | 4 | 0  | - | - |
| Plat_OR405 | 18 | 25 | 4 | 2 | 0  | - | - |
| Plat_OR44  | 30 | 20 | 4 | 3 | 10 | - | - |
| Plat_OR460 | 11 | 16 | 0 | 2 | 0  | - | - |
| Plat_OR488 | 15 | 17 | 2 | 1 | 0  | - | - |
| Plat_OR491 | 24 | 23 | 3 | 4 | 10 | - | - |
| Plat_OR510 | 20 | 16 | 4 | 4 | 8  | - | - |
| Plat_OR519 | 8  | 2  | 1 | 2 | 0  | - | - |
| Plat_OR527 | 20 | 11 | 4 | 0 | 0  | - | - |
| Plat_OR536 | 25 | 18 | 2 | 1 | 0  | - | - |
| Plat_OR539 | 13 | 12 | 0 | 0 | 2  | - | - |
| Plat_OR558 | 13 | 18 | 1 | 2 | 0  | - | - |
| Plat_OR560 | 15 | 18 | 2 | 3 | 0  | - | - |
| Plat_OR563 | 14 | 12 | 0 | 3 | 0  | - | - |
| Plat_OR566 | 21 | 18 | 1 | 3 | 0  | - | - |
| Plat_OR570 | 16 | 31 | 2 | 3 | 0  | - | - |
| Plat_OR571 | 13 | 17 | 2 | 3 | 0  | - | - |
| Plat_OR573 | 16 | 14 | 1 | 2 | 0  | - | - |
| Plat_OR575 | 18 | 31 | 2 | 3 | 0  | - | - |
| Plat_OR578 | 15 | 23 | 2 | 0 | 0  | - | - |
| Plat_OR579 | 16 | 31 | 1 | 2 | 0  | - | - |
| Plat_OR584 | 26 | 15 | 4 | 2 | 2  | - | - |
| Plat_OR585 | 27 | 18 | 4 | 2 | 4  | - | - |

|            |    |    |   |   |   |   |   |
|------------|----|----|---|---|---|---|---|
| Plat_OR590 | 15 | 21 | 3 | 3 | 0 | - | - |
| Plat_OR601 | 27 | 18 | 4 | 2 | 0 | - | - |
| Plat_OR612 | 20 | 20 | 3 | 3 | 0 | - | - |
| Plat_OR619 | 17 | 30 | 2 | 4 | 3 | - | - |
| Plat_OR621 | 17 | 28 | 3 | 3 | 4 | - | - |
| Plat_OR623 | 19 | 29 | 4 | 3 | 3 | - | - |
| Plat_OR624 | 20 | 24 | 1 | 2 | 4 | - | - |
| Plat_OR626 | 20 | 27 | 2 | 3 | 2 | - | - |
| Plat_OR630 | 19 | 31 | 2 | 3 | 2 | - | - |
| Plat_OR631 | 29 | 29 | 2 | 0 | 0 | - | - |
| Plat_OR633 | 27 | 28 | 2 | 0 | 0 | - | - |
| Plat_OR636 | 11 | 29 | 0 | 1 | 1 | - | - |
| Plat_OR638 | 16 | 29 | 2 | 1 | 1 | - | - |
| Plat_OR641 | 21 | 25 | 3 | 2 | 1 | - | - |
| Plat_OR642 | 25 | 29 | 3 | 0 | 1 | - | - |
| Plat_OR643 | 24 | 32 | 0 | 2 | 0 | - | - |
| Plat_OR646 | 24 | 27 | 1 | 2 | 2 | - | - |
| Plat_OR647 | 27 | 26 | 1 | 2 | 2 | - | - |
| Plat_OR648 | 28 | 23 | 1 | 3 | 2 | - | - |
| Plat_OR649 | 27 | 25 | 1 | 3 | 1 | - | - |
| Plat_OR65  | 10 | 3  | 4 | 3 | 5 | - | - |
| Plat_OR650 | 17 | 40 | 4 | 2 | 2 | - | - |
| Plat_OR651 | 17 | 37 | 4 | 2 | 2 | - | - |
| Plat_OR652 | 18 | 36 | 4 | 3 | 2 | - | - |
| Plat_OR653 | 22 | 29 | 1 | 1 | 1 | - | - |
| Plat_OR657 | 23 | 27 | 2 | 5 | 0 | - | - |
| Plat_OR690 | 13 | 29 | 3 | 5 | 0 | - | - |
| Plat_OR698 | 17 | 25 | 4 | 3 | 0 | - | - |
| Plat_OR699 | 16 | 14 | 4 | 2 | 0 | - | - |
| Plat_OR70  | 14 | 27 | 4 | 4 | 0 | - | - |
| Plat_OR700 | 16 | 14 | 4 | 4 | 0 | - | - |
| Plat_OR704 | 14 | 11 | 1 | 4 | 0 | - | - |
| Plat_OR709 | 21 | 24 | 4 | 2 | 0 | - | - |
| Plat_OR711 | 24 | 20 | 4 | 2 | 3 | - | - |
| Plat_OR716 | 24 | 29 | 3 | 1 | 0 | - | - |
| Plat_OR718 | 19 | 24 | 4 | 5 | 0 | - | - |
| Plat_OR720 | 27 | 27 | 3 | 1 | 0 | - | - |
| Plat_OR721 | 26 | 31 | 3 | 3 | 0 | - | - |
| Plat_OR722 | 18 | 28 | 4 | 2 | 0 | - | - |
| Plat_OR724 | 14 | 27 | 4 | 4 | 0 | - | - |
| Plat_OR727 | 19 | 23 | 2 | 0 | 0 | - | - |
| Plat_OR731 | 13 | 25 | 4 | 3 | 0 | - | - |
| Plat_OR735 | 17 | 23 | 0 | 3 | 0 | - | - |
| Plat_OR740 | 18 | 29 | 4 | 2 | 0 | - | - |
| Plat_OR743 | 17 | 30 | 1 | 2 | 0 | - | - |
| Plat_OR747 | 18 | 29 | 2 | 5 | 0 | - | - |
| Plat_OR748 | 17 | 31 | 3 | 4 | 0 | - | - |
| Plat_OR753 | 14 | 22 | 4 | 2 | 0 | - | - |
| Plat_OR87  | 23 | 14 | 1 | 1 | 0 | - | - |
| Plat_OR94  | 18 | 18 | 3 | 1 | 0 | - | - |
| Plat_OR96  | 18 | 27 | 4 | 3 | 5 | - | - |
| Plat_OR99  | 19 | 20 | 3 | 3 | 4 | - | - |
